# Supplementary material for: A facile approach to synthesize 3,5-disubstituted-1,2,4-oxadiazoles via copper-catalyzed-cascade annulation of amidines and methylarenes
Source: Royal Society of Chemistry journal article supplement (doi:10.1039/c5cc02110c), 2015-01-01
Supplement: c5cc02110c1.pdf [file c5cc02110c1.pdf]

# A Facile Approach to 3,5-Disubstituted-1,2,4-Oxadiazoles via Copper-Catalyzed Cascade Annulation Amidines and Methylarenes

Wei Guo,<sup>ab</sup> Kunbo Huang,<sup>a</sup> Fanghua Ji,<sup>a</sup> Wanqing Wu,<sup>a</sup> and Huanfeng Jiang\*<sup>a</sup>

<sup>a</sup> School of Chemistry and Chemical Engineering, South China University of Technology, Guangzhou 510640, China. \*E-mail: [jianghf@scut.edu.cn](mailto:jianghf@scut.edu.cn)

<sup>b</sup> Key laboratory of organo-pharmaceutical chemistry of Jiangxi province, Gannan Normal University, Ganzhou 341000, China

## Supporting Information

|                                                                    |     |
|--------------------------------------------------------------------|-----|
| A. General methods.....                                            | S2  |
| B. General procedure for the synthesis of oxazole derivatives..... | S2  |
| C. Screening reaction conditions.....                              | S2  |
| D. Characterization data .....                                     | S3  |
| E. Reference.....                                                  | S15 |
| F. NMR Spectra.....                                                | S16 |

## A. General methods

Melting points were measured using a melting point instrument and are uncorrected.  $^1\text{H}$  and  $^{13}\text{C}$  NMR spectra were recorded on a 400 MHz NMR spectrometer. IR spectra were obtained with an infrared spectrometer on either potassium bromide pellets or liquid films between two potassium bromide pellets. GC–MS data were obtained using electron ionization. HRMS was carried out on a high-resolution mass spectrometer (LCMS-IT-TOF). TLC was performed using commercially available 100–400 mesh silica gel plates (GF254). Unless otherwise noted, purchased chemicals were used without further purification.

## B. General procedure for the synthesis of disubstituted 1,2,4-oxadiazoles

General procedure for **3aa**: A mixture of benzamidine hydrochloride **1a** (0.25 mmol), toluene **2a** (0.50 mmol),  $\text{Cu}(\text{OAc})_2$  (4.5 mg, 10 mol %),  $\text{K}_3\text{PO}_4$  (159 mg, 3 equiv), 70% TBHP (63 mg, 3 equiv) and DCE (1 mL) in a test tube (10 mL) equipped with a magnetic stirring bar. The mixture was stirred at room temperature for 12 h. After the reaction was completed, 10 mL ethyl acetate ( $3 \times 10$  mL) was added into the tube. The combined organic layers were washed with brine to neutral, dried over  $\text{MgSO}_4$ , and concentrated in vacuum. Purification of the residue on a preparative TLC afforded **3aa** as a white solid.

## C. Screening reaction conditions

We initiated our investigations by examining the reaction of benzamidine hydrochloride (**1a**) with toluene (**2a**) in the presence of copper salts, bases and oxidants (Table 1). Fortunately, the desired product **3aa** was obtained in 24% isolated yield with  $\text{CuCl}_2$  as catalyst,  $\text{K}_3\text{PO}_4$  as base and 70% TBHP as oxidant at room temperature (entry 1). A screening of copper catalysts revealed that  $\text{Cu}(\text{OAc})_2$  was most effective, and its use resulted in the formation of **3aa** in 81% isolated yield (entries 2-5). A higher temperature led to a decreased yield due to the transformation of **1a** to benzonitrile (entries 6-7). No products were obtained in the absence of copper salt, base or oxidant (entries 8-10). The examination of different bases were also performed, however, no desired product could be obtained with the use of DBU (entry 11). Evaluation of additional bases such as KOH,  $\text{Na}_2\text{CO}_3$  and  $\text{Cs}_2\text{CO}_3$  provided conditions that resulted in a much lower yield of **3aa** relative to  $\text{K}_3\text{PO}_4$  (entries 12-14). Some commonly used oxidants, such as TBHP, DTBP,  $\text{H}_2\text{O}_2$ ,  $\text{K}_2\text{S}_2\text{O}_8$  and  $\text{O}_2$  were also tested, in which TBHP was found to be the best one, while others showed little effect (entries 4, 15-18). When the amount of copper, base and oxidant were decreased, dramatic lowering of yields were observed (entries 19-21). When the reaction was performed in  $\text{N}_2$  atmosphere, 79% yield of **3aa** was isolated (entry 22). A gram scale preparation was performed and the isolated yield was 63% (entry 23).

**Table 1.** Screening for optimal reaction conditions.<sup>a</sup>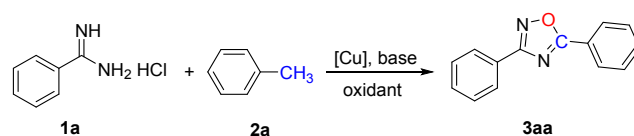

| Entry           | [Cu]                 | Base                            | Oxidant                                      | Yield (%) <sup>b</sup> |
|-----------------|----------------------|---------------------------------|----------------------------------------------|------------------------|
| 1               | CuCl <sub>2</sub>    | K <sub>3</sub> PO <sub>4</sub>  | 70%TBHP                                      | 18                     |
| 2               | CuBr <sub>2</sub>    | K <sub>3</sub> PO <sub>4</sub>  | 70%TBHP                                      | 33                     |
| 3               | CuI                  | K <sub>3</sub> PO <sub>4</sub>  | 70%TBHP                                      | 0                      |
| 4               | Cu(OAc) <sub>2</sub> | K <sub>3</sub> PO <sub>4</sub>  | 70%TBHP                                      | 81                     |
| 5               | Cu(OTf) <sub>2</sub> | K <sub>3</sub> PO <sub>4</sub>  | 70%TBHP                                      | 15                     |
| 6 <sup>c</sup>  | Cu(OAc) <sub>2</sub> | K <sub>3</sub> PO <sub>4</sub>  | 70%TBHP                                      | 21                     |
| 7 <sup>d</sup>  | Cu(OAc) <sub>2</sub> | K <sub>3</sub> PO <sub>4</sub>  | 70%TBHP                                      | trace                  |
| 8               | none                 | K <sub>3</sub> PO <sub>4</sub>  | 70%TBHP                                      | 0                      |
| 9               | Cu(OAc) <sub>2</sub> | none                            | 70%TBHP                                      | 0                      |
| 10              | Cu(OAc) <sub>2</sub> | K <sub>3</sub> PO <sub>4</sub>  | none                                         | 0                      |
| 11              | Cu(OAc) <sub>2</sub> | DBU                             | 70%TBHP                                      | 0                      |
| 12              | Cu(OAc) <sub>2</sub> | KOH                             | 70%TBHP                                      | 11                     |
| 13              | Cu(OAc) <sub>2</sub> | Na <sub>2</sub> CO <sub>3</sub> | 70%TBHP                                      | 14                     |
| 14              | Cu(OAc) <sub>2</sub> | CS <sub>2</sub> CO <sub>3</sub> | 70%TBHP                                      | 28                     |
| 15              | Cu(OAc) <sub>2</sub> | K <sub>3</sub> PO <sub>4</sub>  | DTBP                                         | 0                      |
| 16              | Cu(OAc) <sub>2</sub> | K <sub>3</sub> PO <sub>4</sub>  | H <sub>2</sub> O <sub>2</sub>                | 0                      |
| 17              | Cu(OAc) <sub>2</sub> | K <sub>3</sub> PO <sub>4</sub>  | K <sub>2</sub> S <sub>2</sub> O <sub>8</sub> | 0                      |
| 18              | Cu(OAc) <sub>2</sub> | K <sub>3</sub> PO <sub>4</sub>  | O <sub>2</sub>                               | 0                      |
| 19 <sup>e</sup> | Cu(OAc) <sub>2</sub> | K <sub>3</sub> PO <sub>4</sub>  | 70%TBHP                                      | 43                     |
| 20 <sup>f</sup> | Cu(OAc) <sub>2</sub> | K <sub>3</sub> PO <sub>4</sub>  | 70%TBHP                                      | 46                     |
| 21 <sup>g</sup> | Cu(OAc) <sub>2</sub> | K <sub>3</sub> PO <sub>4</sub>  | 70%TBHP                                      | 28                     |
| 22 <sup>h</sup> | Cu(OAc) <sub>2</sub> | K <sub>3</sub> PO <sub>4</sub>  | 70%TBHP                                      | 79                     |
| 23 <sup>i</sup> | Cu(OAc) <sub>2</sub> | K <sub>3</sub> PO <sub>4</sub>  | 70%TBHP                                      | 63                     |

<sup>a</sup> Reaction conditions: unless otherwise noted, all reaction were performed with **1a** (0.25 mmol), **2a** (0.5 mmol), [Cu] catalyst (10 mol %), 70% TBHP (3 equiv) and base (3 equiv) in a 1.0 mL DCE at room temperature for 12 h. <sup>b</sup> Isolated yield based on **1a**. <sup>c</sup> 60 °C for 12 h. <sup>d</sup> 80 °C for 12 h. <sup>e</sup> 5 mol % Cu(OAc)<sub>2</sub> was used. <sup>f</sup> 1.5 equiv K<sub>3</sub>PO<sub>4</sub> was used. <sup>g</sup> 1.5 equiv 70% TBHP was used. <sup>h</sup> The reaction proceeded with N<sub>2</sub> atmosphere. <sup>i</sup> A gram scale preparation were performed with **1a** (10 mmol), **2a** (20 mmol), Cu(OAc)<sub>2</sub> (10 mol %), K<sub>3</sub>PO<sub>4</sub> (3 equiv), 70% TBHP (3 equiv) and DCE (20 mL) at room temperature for 12 h.

#### D. Control experiments

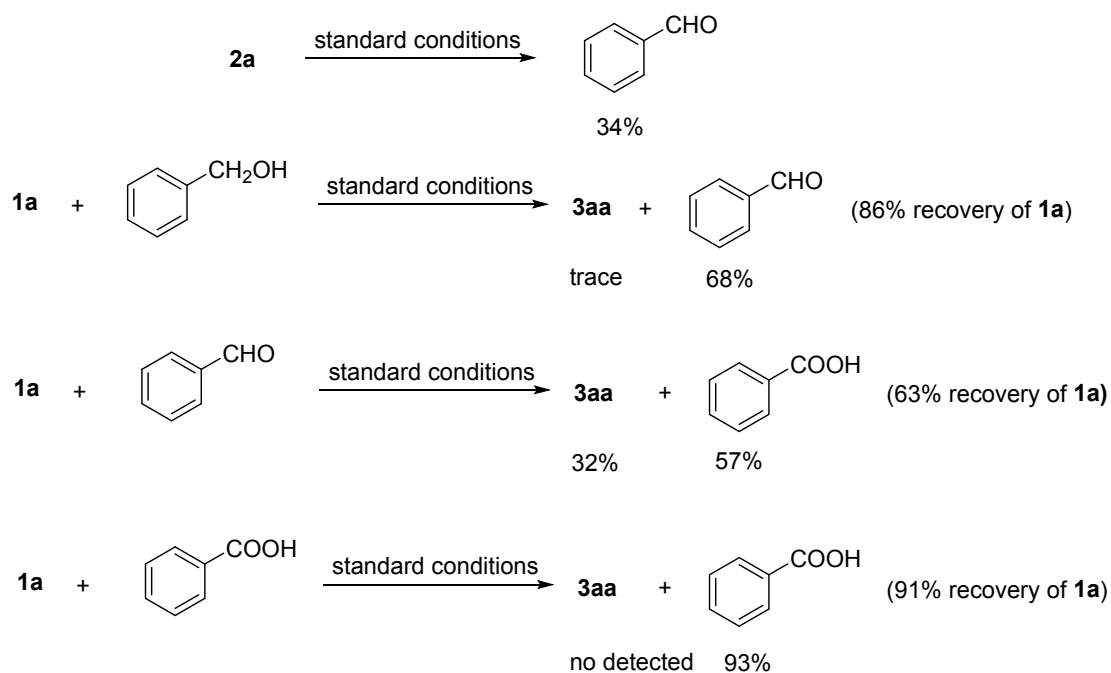

Without benzamidine hydrochloride, the toluene was oxidized to benzaldehyde by TBHP with a low yield under the standard conditions. The reactions failed to give the desired product **3aa** when benzamidine hydrochloride was reacted with benzylic alcohol or benzoic acid under the standard conditions, and we found that benzylic alcohol was converted to benzaldehyde. For benzaldehyde, 32% yield of the desired product was obtained.

### E. Characterization data for all products

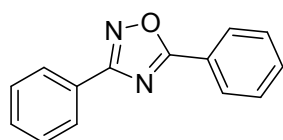

#### 3,5-Diphenyl-1,2,4-oxadiazole<sup>[1]</sup> (**3aa**)

Yield: 0.045 g (81%), white solid, m. p. 108-109 °C; IR (KBr,  $\text{cm}^{-1}$ ):  $\nu = 3057, 1607, 1556, 1533, 1494, 1440, 1362, 1263, 1171, 1129, 720, 682$ ;  $^1\text{H}$  NMR (400 Hz,  $\text{CDCl}_3$ , ppm):  $\delta = 8.19\text{-}8.18$  (m, 4H),  $7.55\text{-}7.49$  (m, 6H);  $^{13}\text{C}$  NMR (100 Hz,  $\text{CDCl}_3$ , ppm):  $\delta = 175.71, 168.99, 132.70, 131.18, 129.09, 128.86, 128.17, 127.56, 127.05, 124.35$ ; HRMS (ESI) calc.  $\text{C}_{14}\text{H}_{10}\text{N}_2\text{ONa}$   $[\text{M}+\text{Na}]^+$ : 245.0685, found: 245.0687.

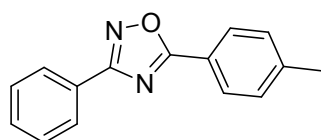

#### 3-Phenyl-5-p-tolyl-1,2,4-oxadiazole<sup>[2]</sup> (**3ab**)

Yield: 0.041 g (68%), white solid, m. p. 112-114 °C; IR (KBr,  $\text{cm}^{-1}$ ):  $\nu = 3067, 3032,$

2922, 2851, 1610, 1526, 1443, 1362, 1267, 1177, 1128, 739, 691;  $^1\text{H}$  NMR (400 Hz,  $\text{CDCl}_3$ , ppm):  $\delta$  = 8.18 (d, 2H,  $J$  = 8.0 Hz), 8.10 (d, 2H,  $J$  = 8.0 Hz), 7.51-7.50 (m, 3H), 7.34 (d, 2H,  $J$  = 8.0 Hz), 2.44 (s, 3H);  $^{13}\text{C}$  NMR (100 Hz,  $\text{CDCl}_3$ , ppm):  $\delta$  = 175.86, 168.90, 143.48, 131.11, 129.81, 128.83, 128.15, 127.53, 127.12, 121.63, 21.75; HRMS (ESI) calc.  $\text{C}_{15}\text{H}_{12}\text{N}_2\text{ONa}$   $[\text{M}+\text{Na}]^+$ : 259.0842, found: 259.0837.

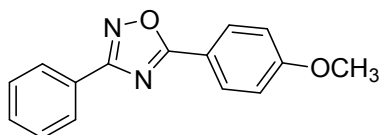

### 5-(4-Methoxyphenyl)-3-phenyl-1,2,4-oxadiazole<sup>[3]</sup> (3ac)

Yield: 0.043 g (68%), white solid, m. p. 95-97 °C; IR (KBr,  $\text{cm}^{-1}$ ):  $\nu$  = 3069, 2977, 2919, 2844, 1609, 1510, 1468, 1368, 1263, 1179, 1022, 836, 749, 692;  $^1\text{H}$  NMR (400 Hz,  $\text{CDCl}_3$ , ppm):  $\delta$  = 8.16-8.14 (m, 4H), 7.51-7.49 (m, 3H), 7.04-7.01 (m, 2H), 3.88 (s, 3H);  $^{13}\text{C}$  NMR (100 Hz,  $\text{CDCl}_3$ , ppm):  $\delta$  = 175.60, 168.83, 163.18, 131.06, 130.07, 128.81, 127.51, 127.18, 116.91, 114.51, 55.50; HRMS (ESI) calc.  $\text{C}_{15}\text{H}_{12}\text{N}_2\text{O}_2\text{Na}$   $[\text{M}+\text{Na}]^+$ : 275.0791, found: 275.0792.

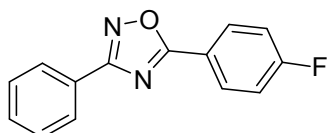

### 5-(4-Fluorophenyl)-3-phenyl-1,2,4-oxadiazole (3ad)

Yield: 0.042 g (70%), white solid, m. p. 119-120 °C; IR (KBr,  $\text{cm}^{-1}$ ):  $\nu$  = 3072, 1602, 1524, 1470, 1414, 1362, 1283, 1077, 843, 747, 694;  $^1\text{H}$  NMR (400 Hz,  $\text{CDCl}_3$ , ppm):  $\delta$  = 8.22-8.29 (m, 2H), 8.15 (d, 2H,  $J$  = 8.0 Hz), 7.50-7.49 (m, 3H), 7.24-7.19 (m, 2H);  $^{13}\text{C}$  NMR (100 Hz,  $\text{CDCl}_3$ , ppm):  $\delta$  = 174.78, 168.99, 165.47 (d,  $J$  = 253 Hz), 131.24, 130.60 (d,  $J$  = 9 Hz), 128.86, 127.52, 126.87, 120.71 (d,  $J$  = 3 Hz), 116.46 (d,  $J$  = 22 Hz); HRMS (ESI) calc.  $\text{C}_{14}\text{H}_9\text{FN}_2\text{ONa}$   $[\text{M}+\text{Na}]^+$ : 263.0591, found: 263.0589.

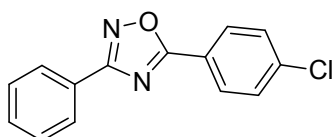

### 5-(4-Chlorophenyl)-3-phenyl-1,2,4-oxadiazole<sup>[4]</sup> (3ae)

Yield: 0.047 g (74%), white solid, m. p. 118-121 °C; IR (KBr,  $\text{cm}^{-1}$ ):  $\nu$  = 3062, 1604, 1554, 1522, 1494, 1399, 1361, 1267, 1082, 836, 738, 698;  $^1\text{H}$  NMR (400 Hz,  $\text{CDCl}_3$ , ppm):  $\delta$  = 8.15 (d, 4H,  $J$  = 8.0 Hz), 7.54-7.42 (m, 5H);  $^{13}\text{C}$  NMR (100 Hz,  $\text{CDCl}_3$ , ppm):  $\delta$  = 174.81, 169.07, 139.20, 131.29, 129.52, 129.45, 128.88, 127.53, 126.79, 122.79; HRMS (ESI) calc.  $\text{C}_{14}\text{H}_9\text{ClN}_2\text{ONa}$   $[\text{M}+\text{Na}]^+$ : 279.0296, found: 279.0301.

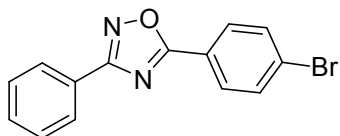

### 5-(4-Bromophenyl)-3-phenyl-1,2,4-oxadiazole<sup>[5]</sup> (3af)

Yield: 0.055 g (72%), white solid, m. p. 118-121 °C; IR (KBr, cm<sup>-1</sup>):  $\nu$  = 3061, 1603, 1581, 1551, 1519, 1475, 1401, 1365, 1266, 832, 737, 714, 681; <sup>1</sup>H NMR (400 Hz, CDCl<sub>3</sub>, ppm):  $\delta$  = 8.16 (d, 2H,  $J$  = 8.0 Hz), 8.08 (d, 2H,  $J$  = 8.0 Hz), 7.70 (d, 2H,  $J$  = 8.0 Hz), 7.52-7.51 (m, 3H); <sup>13</sup>C NMR (100 Hz, CDCl<sub>3</sub>, ppm):  $\delta$  = 174.92, 169.09, 132.51, 131.31, 129.56, 128.89, 127.73, 127.54, 126.77, 123.22; HRMS (ESI) calc. C<sub>14</sub>H<sub>9</sub>BrN<sub>2</sub>O<sub>Na</sub> [M+Na]<sup>+</sup>: 322.9790, found: 322.9787.

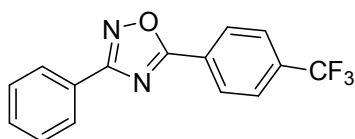

### 3-Phenyl-5-(4-(trifluoromethyl)phenyl)-1,2,4-oxadiazole (3ag)

Yield: 0.047 g (65%), white solid, m. p. 101-102 °C; IR (KBr, cm<sup>-1</sup>):  $\nu$  = 3076, 3036, 1598, 1564, 1526, 1508, 1470, 1449, 1413, 1326, 1170, 1118, 850, 792, 757, 721, 686; <sup>1</sup>H NMR (400 Hz, CDCl<sub>3</sub>, ppm):  $\delta$  = 8.35 (d, 2H,  $J$  = 8.0 Hz), 8.17 (d, 2H,  $J$  = 4.0 Hz), 7.82 (d, 2H,  $J$  = 8.0 Hz), 7.53-7.52 (m, 3H); <sup>13</sup>C NMR (100 Hz, CDCl<sub>3</sub>, ppm):  $\delta$  = 174.38, 169.24, 134.27 (d,  $J$  = 32 Hz), 131.43, 128.93, 128.55, 127.56, 127.47, 126.61, 126.14 (q,  $J$  = 8 Hz), 124.31 (d,  $J$  = 271 Hz); HRMS (ESI) calc. C<sub>15</sub>H<sub>10</sub>F<sub>3</sub>N<sub>2</sub>O [M+H]<sup>+</sup>: 291.0740, found: 291.0736.

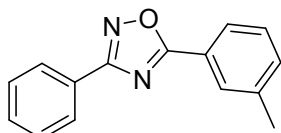

### 3-Phenyl-5-m-tolyl-1,2,4-oxadiazole<sup>[6]</sup> (3ah)

Yield: 0.039 g (65%), white solid, m. p. 72-73 °C; IR (KBr, cm<sup>-1</sup>):  $\nu$  = 3064, 2922, 2851, 1611, 1559, 1529, 1478, 1441, 1361, 1283, 1068, 917, 737, 690; <sup>1</sup>H NMR (400 Hz, CDCl<sub>3</sub>, ppm):  $\delta$  = 8.18-8.17 (m, 2H), 8.04-8.00 (m, 2H), 7.51-7.50 (m, 3H), 7.45-7.39 (m, 2H), 2.46 (s, 3H); <sup>13</sup>C NMR (100 Hz, CDCl<sub>3</sub>, ppm):  $\delta$  = 175.92, 168.94, 139.03, 129.01, 128.84, 128.67, 127.54, 127.06, 125.33, 124.22, 21.33; HRMS (ESI) calc. C<sub>15</sub>H<sub>12</sub>N<sub>2</sub>O<sub>Na</sub> [M+Na]<sup>+</sup>: 259.0842, found: 259.0845.

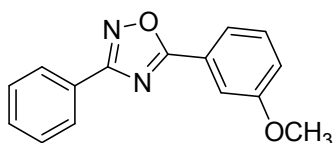

### 5-(3-Methoxyphenyl)-3-phenyl-1,2,4-oxadiazole<sup>[5]</sup> (3ai)

Yield: 0.045 g (71%), white solid, m. p. 81-83 °C; IR (KBr, cm<sup>-1</sup>):  $\nu$  = 3068, 3005, 2931, 2840, 1605, 1559, 1483, 1439, 1363, 1287, 1229, 1181, 1129, 1041, 992, 849,

793, 744, 691; <sup>1</sup>H NMR (400 Hz, CDCl<sub>3</sub>, ppm): δ = 8.17 (d, 2H, *J* = 4.0 Hz), 7.80 (d, 1H, *J* = 8.0 Hz), 7.72 (s, 1H), 7.51-7.43 (m, 4H), 7.13 (d, 1H, *J* = 12.0 Hz), 3.90 (s, 3H); <sup>13</sup>C NMR (100 Hz, CDCl<sub>3</sub>, ppm): δ = 175.66, 168.99, 159.99, 131.19, 130.24, 128.85, 127.55, 126.99, 125.41, 120.61, 119.29, 112.64, 55.56; HRMS (ESI) calc. C<sub>15</sub>H<sub>12</sub>N<sub>2</sub>O<sub>2</sub>Na [M+Na]<sup>+</sup>: 275.0791, found: 275.0792.

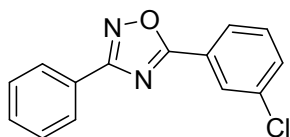

### 5-(3-Chlorophenyl)-3-phenyl-1,2,4-oxadiazole<sup>[5]</sup> (3aj)

Yield: 0.047 g (73%), white solid, m. p. 102-103 °C; IR (KBr, cm<sup>-1</sup>): ν = 3073, 1604, 1554, 1522, 1475, 1439, 1362, 1282, 1074, 733, 682; <sup>1</sup>H NMR (400 Hz, CDCl<sub>3</sub>, ppm): δ = 8.20 (s, 1H), 8.15 (d, 2H, *J* = 8.0 Hz), 8.08 (d, 2H, *J* = 8.0 Hz), 7.57-7.47 (m, 5H); <sup>13</sup>C NMR (100 Hz, CDCl<sub>3</sub>, ppm): δ = 174.45, 169.08, 135.29, 132.74, 131.33, 130.45, 128.89, 128.17, 127.54, 126.71, 126.19, 125.90; HRMS (ESI) calc. C<sub>14</sub>H<sub>9</sub>ClN<sub>2</sub>ONa [M+Na]<sup>+</sup>: 279.0296, found: 279.0297.

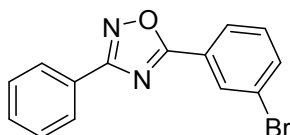

### 5-(3-Bromophenyl)-3-phenyl-1,2,4-oxadiazole<sup>[5]</sup> (3ak)

Yield: 0.057 g (76%), white solid, m. p. 107-109 °C; IR (KBr, cm<sup>-1</sup>): ν = 3061, 3031, 1603, 1551, 1521, 1480, 1439, 1356, 1271, 1075, 793, 737, 680; <sup>1</sup>H NMR (400 Hz, CDCl<sub>3</sub>, ppm): δ = 8.35 (s, 1H), 8.16-8.11 (m, 3H), 7.71 (d, 1H, *J* = 8.0 Hz), 7.51-7.50 (m, 3H), 7.39 (d, 1H, *J* = 8.0 Hz); <sup>13</sup>C NMR (100 Hz, CDCl<sub>3</sub>, ppm): δ = 174.30, 169.06, 135.66, 131.34, 131.05, 130.65, 128.90, 127.54, 126.70, 126.63, 126.10, 123.16; HRMS (ESI) calc. C<sub>14</sub>H<sub>9</sub>BrN<sub>2</sub>ONa [M+Na]<sup>+</sup>: 322.9790, found: 322.9790.

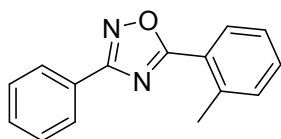

### 3-Phenyl-5-o-tolyl-1,2,4-oxadiazole<sup>[7]</sup> (3al)

Yield: 0.036 g (61%), white solid, m. p. 51-52 °C; IR (KBr, cm<sup>-1</sup>): ν = 3065, 2968, 2927, 2854, 1604, 1555, 1520, 1440, 1361, 1298, 1255, 1174, 1065, 799, 740, 691; <sup>1</sup>H NMR (400 Hz, CDCl<sub>3</sub>, ppm): δ = 8.19-8.14 (m, 3H), 7.51-7.50 (m, 3H), 7.44 (d, 1H, *J* = 8.0 Hz), 7.35 (d, 2H, *J* = 8.0 Hz), 2.77 (s, 3H); <sup>13</sup>C NMR (100 Hz, CDCl<sub>3</sub>, ppm): δ = 176.35, 168.60, 139.16, 132.18, 131.91, 131.13, 130.21, 128.85, 127.55, 127.17, 126.28, 123.51, 21.97; HRMS (ESI) calc. C<sub>15</sub>H<sub>12</sub>N<sub>2</sub>ONa [M+Na]<sup>+</sup>: 259.0842, found: 259.0846.

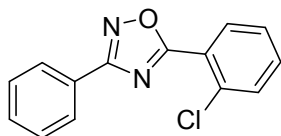

### 5-(2-Chlorophenyl)-3-phenyl-1,2,4-oxadiazole (3am)

Yield: 0.041 g (63%), white solid, m. p. 56-57 °C; IR (KBr,  $\text{cm}^{-1}$ ):  $\nu = 3067, 1605, 1571, 1519, 1482, 1445, 1362, 1301, 1134, 1045, 967, 915, 743, 689$ ;  $^1\text{H NMR}$  (400 Hz,  $\text{CDCl}_3$ , ppm):  $\delta = 8.18$  (d, 2H,  $J = 8.0$  Hz), 8.12 (d, 1H,  $J = 8.0$  Hz), 7.56-7.45 (m, 5H), 7.41-7.38 (m, 1H);  $^{13}\text{C NMR}$  (100 Hz,  $\text{CDCl}_3$ , ppm):  $\delta = 174.31, 166.70, 133.88, 133.12, 131.94, 131.45, 131.29, 128.90, 127.59, 127.09, 126.81, 123.67$ ; HRMS (ESI) calc.  $\text{C}_{14}\text{H}_9\text{ClN}_2\text{ONa}$   $[\text{M}+\text{Na}]^+$ : 279.0296, found: 279.0301.

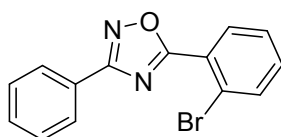

### 5-(2-Bromophenyl)-3-phenyl-1,2,4-oxadiazole (3an)

Yield: 0.046 g (62%), white solid, m. p. 56-57 °C; IR (KBr,  $\text{cm}^{-1}$ ):  $\nu = 3069, 1600, 1570, 1543, 1480, 1446, 1359, 1312, 1139, 1028, 974, 740, 691$ ;  $^1\text{H NMR}$  (400 Hz,  $\text{CDCl}_3$ , ppm):  $\delta = 8.18$  (d, 2H,  $J = 8.0$  Hz), 8.06 (d, 1H,  $J = 8.0$  Hz), 7.77 (d, 1H,  $J = 8.0$  Hz), 7.51-7.38 (m, 5H);  $^{13}\text{C NMR}$  (100 Hz,  $\text{CDCl}_3$ , ppm):  $\delta = 174.85, 168.71, 134.81, 132.16, 131.31, 128.91, 127.60, 126.79, 125.80, 122.16$ ; HRMS (ESI) calc.  $\text{C}_{14}\text{H}_9\text{BrN}_2\text{ONa}$   $[\text{M}+\text{Na}]^+$ : 322.9790, found: 322.9793.

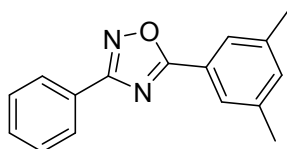

### 5-(3,5-Dimethylphenyl)-3-phenyl-1,2,4-oxadiazole (3ao)

Yield: 0.043 g (69%), white solid, m. p. 87-88 °C; IR (KBr,  $\text{cm}^{-1}$ ):  $\nu = 3066, 2920, 2850, 1610, 1562, 1445, 1363, 1300, 1224, 1028, 919, 833, 748, 690$ ;  $^1\text{H NMR}$  (400 Hz,  $\text{CDCl}_3$ , ppm):  $\delta = 8.18$ -8.17 (m, 2H), 7.84 (s, 2H), 7.51-7.50 (m, 3H), 7.23 (s, 1H), 2.42 (s, 6H);  $^{13}\text{C NMR}$  (100 Hz,  $\text{CDCl}_3$ , ppm):  $\delta = 176.1, 168.89, 138.90, 134.49, 131.11, 128.83, 127.53, 127.10, 125.87, 124.09, 21.20$ ; HRMS (ESI) calc.  $\text{C}_{16}\text{H}_{14}\text{N}_2\text{ONa}$   $[\text{M}+\text{Na}]^+$ : 273.0998, found: 273.1005.

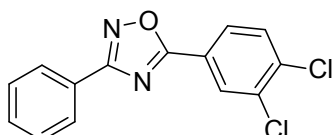

### 5-(3,4-Dichlorophenyl)-3-phenyl-1,2,4-oxadiazole (3ap)

Yield: 0.054 g (74%), white solid, m. p. 133-134 °C; IR (KBr,  $\text{cm}^{-1}$ ):  $\nu = 3068, 1608, 1574, 1546, 1480, 1448, 1396, 1361, 1289, 1269, 1031, 912, 893, 829, 803, 740, 685$ ;  $^1\text{H NMR}$  (400 Hz,  $\text{CDCl}_3$ , ppm):  $\delta = 8.29$  (s, 1H), 8.14-8.13 (m, 2H), 8.01 (d, 1H,  $J =$



8.0 Hz), 7.61 (d, 1H,  $J = 8.0$  Hz), 7.51-7.50 (m, 3H);  $^{13}\text{C}$  NMR (100 Hz,  $\text{CDCl}_3$ , ppm):  $\delta = 173.72, 169.14, 137.40, 133.82, 131.42, 131.31, 129.92, 128.91, 127.53, 127.06, 126.54, 124.02$ ; HRMS (ESI) calc.  $\text{C}_{14}\text{H}_9\text{Cl}_2\text{N}_2\text{O}$   $[\text{M}+\text{H}]^+$ : 291.0086, found: 291.0086.

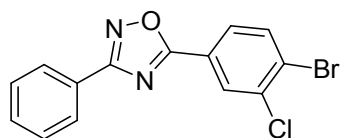

#### 5-(4-Bromo-3-chlorophenyl)-3-phenyl-1,2,4-oxadiazole (3aq)

Yield: 0.061 g (73%), white solid, m. p. 107-108 °C; IR (KBr,  $\text{cm}^{-1}$ ):  $\nu = 3066, 1604, 1545, 1524, 1476, 1447, 1393, 1360, 1118, 1021, 741, 685$ ;  $^1\text{H}$  NMR (400 Hz,  $\text{CDCl}_3$ , ppm):  $\delta = 8.30$  (s, 1H), 8.15 (d, 2H,  $J = 8.0$  Hz), 7.94 (d, 1H,  $J = 8.0$  Hz), 7.81 (d, 1H,  $J = 8.0$  Hz), 7.52-7.51 (m, 3H);  $^{13}\text{C}$  NMR (100 Hz,  $\text{CDCl}_3$ , ppm):  $\delta = 173.85, 169.18, 135.83, 134.65, 131.44, 129.64, 128.93, 127.75, 127.55, 127.04, 126.54, 124.71$ ; HRMS (ESI) calc.  $\text{C}_{14}\text{H}_9\text{BrClN}_2\text{O}$   $[\text{M}+\text{H}]^+$ : 334.9738, found: 334.9728.

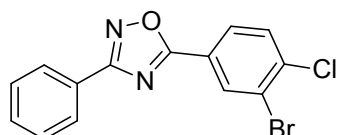

#### 5-(3-Bromo-4-chlorophenyl)-3-phenyl-1,2,4-oxadiazole (3ar)

Yield: 0.062 g (75%), white solid, m. p. 148-149 °C; IR (KBr,  $\text{cm}^{-1}$ ):  $\nu = 3064, 1604, 1544, 1525, 1478, 1447, 1391, 1361, 1289, 1268, 1123, 1025, 981, 913, 895, 830, 741, 685$ ;  $^1\text{H}$  NMR (400 Hz,  $\text{CDCl}_3$ , ppm):  $\delta = 8.47$  (s, 1H), 8.14 (d, 2H,  $J = 8.0$  Hz), 8.06 (d, 1H,  $J = 8.0$  Hz), 7.62 (d, 1H,  $J = 8.0$  Hz), 7.52-7.50 (m, 3H);  $^{13}\text{C}$  NMR (100 Hz,  $\text{CDCl}_3$ , ppm):  $\delta = 173.58, 169.14, 139.36, 133.17, 131.43, 131.10, 128.92, 127.73, 127.54, 126.54, 124.08, 123.51$ ; HRMS (ESI) calc.  $\text{C}_{14}\text{H}_9\text{BrClN}_2\text{O}$   $[\text{M}+\text{H}]^+$ : 334.9738, found: 334.9731.

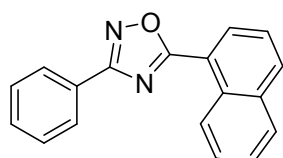

#### 5-(Naphthalen-1-yl)-3-phenyl-1,2,4-oxadiazole<sup>81</sup> (3as)

Yield: 0.038 g (56%), white solid, m. p. 87-89 °C; IR (KBr,  $\text{cm}^{-1}$ ):  $\nu = 3054, 1598, 1579, 1551, 1514, 1474, 1445, 1358, 1306, 1288, 1252, 1143, 1071, 966, 844, 773, 750, 730, 694$ ;  $^1\text{H}$  NMR (400 Hz,  $\text{CDCl}_3$ , ppm):  $\delta = 9.26$  (d, 1H,  $J = 8.0$  Hz), 8.41 (d, 1H,  $J = 8.0$  Hz), 8.26-8.25 (m, 2H), 8.08 (d, 1H,  $J = 8.0$  Hz), 7.93 (d, 1H,  $J = 8.0$  Hz), 7.71-7.69 (m, 1H), 7.61-7.54 (m, 5H);  $^{13}\text{C}$  NMR (100 Hz,  $\text{CDCl}_3$ , ppm):  $\delta = 175.89, 168.85, 133.92, 133.62, 131.23, 130.32, 130.00, 128.91, 128.81, 128.31, 127.64, 127.64, 126.74, 125.84, 124.93, 120.84$ ; HRMS (ESI) calc.  $\text{C}_{18}\text{H}_{12}\text{N}_2\text{ONa}$   $[\text{M}+\text{Na}]^+$ : 295.0842, found: 295.0850.

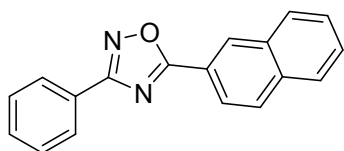

### 5-(Naphthalen-2-yl)-3-phenyl-1,2,4-oxadiazole (3at)

Yield: 0.030 g (43%), white solid, m. p. 121-122 °C; IR (KBr,  $\text{cm}^{-1}$ ):  $\nu = 3053, 1608, 1585, 1554, 1526, 1473, 1444, 1367, 1290, 1134, 1071, 905, 824, 759, 737, 694$ ;  $^1\text{H}$  NMR (400 Hz,  $\text{CDCl}_3$ , ppm):  $\delta = 8.77$  (s, 1H), 8.25-8.21 (m, 3H), 8.02-7.99 (m, 2H), 7.91 (d, 1H,  $J = 8.0$  Hz), 7.62-7.54 (m, 5H);  $^{13}\text{C}$  NMR (100 Hz,  $\text{CDCl}_3$ , ppm):  $\delta = 175.90, 169.09, 135.24, 132.80, 131.24, 129.25, 129.19, 129.08, 128.88, 128.65, 128.46, 127.99, 127.58, 127.19, 123.93, 121.55$ ; HRMS (ESI) calc.  $\text{C}_{18}\text{H}_{12}\text{N}_2\text{O}$   $[\text{M}+\text{Na}]^+$ : 295.0842, found: 295.0845.

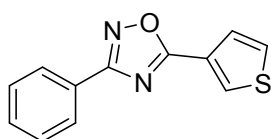

### 3-Phenyl-5-(thiophen-3-yl)-1,2,4-oxadiazole (3au)

Yield: 0.035 g (54%), white solid, m. p. 77-78 °C; IR (KBr,  $\text{cm}^{-1}$ ):  $\nu = 3104, 1637, 1600, 1525, 1471, 1443, 1416, 1384, 1353, 1299, 1125, 1070, 1023, 914, 855, 804, 736, 690$ ;  $^1\text{H}$  NMR (400 Hz,  $\text{CDCl}_3$ , ppm):  $\delta = 8.18$  (s, 1H), 8.07-8.06 (m, 2H), 7.66-7.65 (m, 1H), 7.42-7.38 (m, 4H);  $^{13}\text{C}$  NMR (100 Hz,  $\text{CDCl}_3$ , ppm):  $\delta = 171.96, 168.81, 131.18, 130.17, 128.85, 127.55, 127.44, 126.95, 126.71, 126.01$ ; HRMS (ESI) calc.  $\text{C}_{12}\text{H}_9\text{N}_2\text{OS}$   $[\text{M}+\text{H}]^+$ : 229.0587, found: 229.0585.

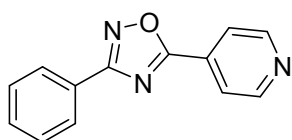

### 4-(3-Phenyl-1,2,4-oxadiazol-5-yl)pyridine (3av)

Yield: 0.037 g (67%), white solid, m. p. 155-157 °C; IR (KBr,  $\text{cm}^{-1}$ ):  $\nu = 3065, 3031, 1644, 1608, 1572, 1545, 1471, 1445, 1410, 1363, 1284, 1222, 1174, 1132, 1065, 1023, 915, 834, 767, 734, 719, 688$ ;  $^1\text{H}$  NMR (400 Hz,  $\text{CDCl}_3$ , ppm):  $\delta = 8.88$  (s, 2H), 8.17 (d, 2H,  $J = 8.0$  Hz), 8.05 (d, 2H,  $J = 4.0$  Hz), 7.53-7.50 (m, 3H);  $^{13}\text{C}$  NMR (100 Hz,  $\text{CDCl}_3$ , ppm):  $\delta = 173.79, 169.37, 151.03, 131.55, 131.18, 128.97, 127.57, 126.38, 121.37$ ; HRMS (ESI) calc.  $\text{C}_{13}\text{H}_{10}\text{N}_3\text{O}$   $[\text{M}+\text{H}]^+$ : 224.0818, found: 224.0818.

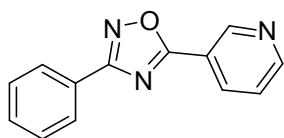

### 3-(3-Phenyl-1,2,4-oxadiazol-5-yl)pyridine<sup>[9]</sup> (3aw)

Yield: 0.035 g (63%), white solid, m. p. 120-122 °C; IR (KBr,  $\text{cm}^{-1}$ ):  $\nu = 3063, 1634,$

1603, 1578, 1550, 1519, 1439, 1357, 1283, 1129, 1071, 965, 896, 734, 687; <sup>1</sup>H NMR (400 Hz, CDCl<sub>3</sub>, ppm): δ = 9.44 (s, 1H), 8.84 (d, 1H, *J* = 8.0 Hz), 8.46 (d, 1H, *J* = 8.0 Hz), 8.17 (d, 2H, *J* = 8.0 Hz), 7.52-7.48 (m, 4H); <sup>13</sup>C NMR (100 Hz, CDCl<sub>3</sub>, ppm): δ = 173.65, 169.10, 153.26, 149.16, 135.24, 131.43, 128.92, 127.56, 126.53, 123.80, 120.76; HRMS (ESI) calc. C<sub>13</sub>H<sub>10</sub>N<sub>3</sub>O [M+H]<sup>+</sup>: 224.0818, found: 224.0815.

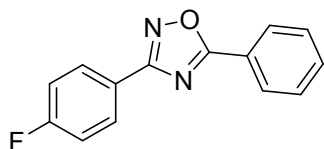

### 3-(4-Fluorophenyl)-5-phenyl-1,2,4-oxadiazole (3ba)

Yield: 0.045 g (74%), white solid, m. p. 116-117 °C; IR (KBr, cm<sup>-1</sup>): ν = 3063, 1603, 1558, 1488, 1446, 1359, 1319, 1282, 1223, 1130, 1097, 1064, 843, 742, 683; <sup>1</sup>H NMR (400 Hz, CDCl<sub>3</sub>, ppm): δ = 8.19-8.14 (m, 4H), 7.57-7.51 (m, 3H), 7.19-7.15 (t, 2H, *J* = 8.0 Hz); <sup>13</sup>C NMR (100 Hz, CDCl<sub>3</sub>, ppm): δ = 175.78, 168.13, 164.60 (d, *J* = 250 Hz), 132.78, 129.68 (d, *J* = 9 Hz), 129.10, 128.15, 124.22, 123.24 (d, *J* = 3 Hz), 116.01 (d, *J* = 22 Hz); HRMS (ESI) calc. C<sub>14</sub>H<sub>9</sub>FN<sub>2</sub>ONa [M+Na]<sup>+</sup>: 263.0591, found: 263.0593.

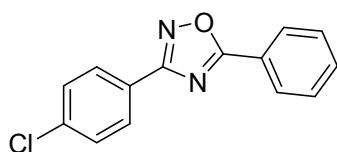

### 3-(4-Chlorophenyl)-5-phenyl-1,2,4-oxadiazole<sup>[2]</sup> (3ca)

Yield: 0.046 g (72%), white solid, m. p. 77-79 °C (108-110) ; IR (KBr, cm<sup>-1</sup>): ν = 3061, 1604, 1554, 1518, 1489, 1445, 1405, 1356, 1271, 1088, 1017, 966, 918, 834, 738, 707, 683; <sup>1</sup>H NMR (400 Hz, CDCl<sub>3</sub>, ppm): δ = 8.13 (d, 2H, *J* = 8.0 Hz), 8.05 (d, 2H, *J* = 8.0 Hz), 7.54-7.40 (m, 5H); <sup>13</sup>C NMR (100 Hz, CDCl<sub>3</sub>, ppm): δ = 175.80, 168.07, 137.27, 132.78, 129.12, 129.07, 128.80, 128.13, 125.49, 124.13; HRMS (ESI) calc. C<sub>14</sub>H<sub>9</sub>ClN<sub>2</sub>ONa [M+Na]<sup>+</sup>: 279.0296, found: 279.0294.

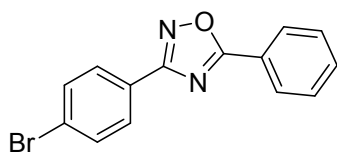

### 3-(4-Bromophenyl)-5-phenyl-1,2,4-oxadiazole<sup>[2]</sup> (3da)

Yield: 0.054 g (72%), white solid, m. p. 102-103 °C; IR (KBr, cm<sup>-1</sup>): ν = 3059, 1595, 1553, 1516, 1489, 1445, 1403, 1356, 1318, 1271, 1176, 1131, 1104, 1072, 919, 834, 737, 684; <sup>1</sup>H NMR (400 Hz, CDCl<sub>3</sub>, ppm): δ = 8.20 (d, 2H, *J* = 8.0 Hz), 8.04 (d, 2H, *J* = 8.0 Hz), 7.65-7.60 (m, 3H), 7.57-7.53 (m, 2H); <sup>13</sup>C NMR (100 Hz, CDCl<sub>3</sub>, ppm): δ = 175.93, 168.27, 132.88, 132.15, 129.15, 129.04, 128.19, 125.95, 125.75, 124.15; HRMS (ESI) calc. C<sub>14</sub>H<sub>9</sub>BrN<sub>2</sub>ONa [M+Na]<sup>+</sup>: 322.9790, found: 322.9791.

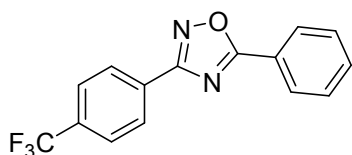

### 5-Phenyl-3-(4-(trifluoromethyl)phenyl)-1,2,4-oxadiazole (3ea)

Yield: 0.044 g (61%), white solid, m. p. 93-95 °C; IR (KBr,  $\text{cm}^{-1}$ ):  $\nu = 3065, 1614, 1558, 1494, 1446, 1414, 1360, 1324, 1269, 1172, 1105, 1062, 1017, 848, 750, 726, 686$ ;  $^1\text{H NMR}$  (400 Hz,  $\text{CDCl}_3$ , ppm):  $\delta = 8.30$  (d, 2H,  $J = 8.0$  Hz),  $8.22$  (d, 2H,  $J = 8.0$  Hz),  $7.81$ - $7.76$  (m, 2H),  $7.63$ - $7.55$  (m, 3H);  $^{13}\text{C NMR}$  (100 Hz,  $\text{CDCl}_3$ , ppm):  $\delta = 176.14, 167.91, 132.94, 132.86$  (d,  $J = 32$  Hz),  $130.40$ ,  $129.13, 128.17, 127.84, 125.79$  (dd,  $J = 3$  Hz,  $J = 11$  Hz),  $124.01, 123.83$  (d,  $J = 270$  Hz); HRMS (ESI) calc.  $\text{C}_{15}\text{H}_{10}\text{F}_3\text{N}_2\text{O}$   $[\text{M}+\text{H}]^+$ : 291.0740, found: 291.0740.

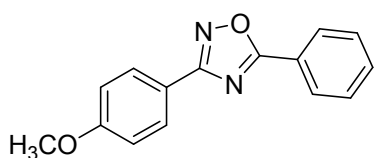

### 3-(4-Methoxyphenyl)-5-phenyl-1,2,4-oxadiazole<sup>[10]</sup> (3fa)

Yield: 0.049 g (78%), white solid, m. p. 97-98 °C; IR (KBr,  $\text{cm}^{-1}$ ):  $\nu = 3059, 3006, 2968, 2916, 2839, 1610, 1558, 1494, 1450, 1419, 1364, 1303, 1256, 1172, 1026, 835, 746, 684$ ;  $^1\text{H NMR}$  (400 Hz,  $\text{CDCl}_3$ , ppm):  $\delta = 8.20$  (d, 2H,  $J = 8.0$  Hz),  $8.11$  (d, 2H,  $J = 8.0$  Hz),  $7.59$ - $7.52$  (m, 3H),  $7.01$  (d, 2H,  $J = 8.0$  Hz),  $3.87$  (s, 3H);  $^{13}\text{C NMR}$  (100 Hz,  $\text{CDCl}_3$ , ppm):  $\delta = 175.44, 168.68, 161.96, 132.63, 129.14, 129.07, 128.15, 124.44, 119.47, 114.26, 55.39$ ; HRMS (ESI) calc.  $\text{C}_{15}\text{H}_{12}\text{N}_2\text{O}_2\text{Na}$   $[\text{M}+\text{Na}]^+$ : 275.0791, found: 275.0799.

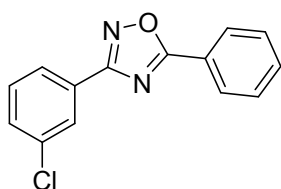

### 3-(3-Chlorophenyl)-5-phenyl-1,2,4-oxadiazole<sup>[2]</sup> (3ga)

Yield: 0.049 g (77%), white solid, m. p. 102-103 °C; IR (KBr,  $\text{cm}^{-1}$ ):  $\nu = 3089, 1608, 1553, 1514, 1471, 1457, 1440, 1361, 1280, 1140, 1072, 885, 764, 677$ ;  $^1\text{H NMR}$  (400 Hz,  $\text{CDCl}_3$ , ppm):  $\delta = 8.20$  (s, 1H),  $8.17$  (d, 2H,  $J = 8.0$  Hz),  $8.04$  (d, 1H,  $J = 4.0$  Hz),  $7.62$ - $7.52$  (m, 3H),  $7.49$ - $7.40$  (m, 2H);  $^{13}\text{C NMR}$  (100 Hz,  $\text{CDCl}_3$ , ppm):  $\delta = 175.97, 167.96, 134.95, 132.89, 131.21, 130.16, 129.14, 128.73, 128.18, 127.65, 125.57, 124.11$ ; HRMS (ESI) calc.  $\text{C}_{14}\text{H}_9\text{ClN}_2\text{ONa}$   $[\text{M}+\text{Na}]^+$ : 279.0296, found: 279.0303.

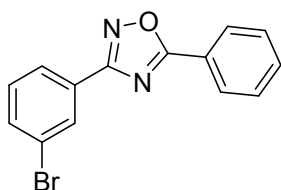

### 3-(3-Bromophenyl)-5-phenyl-1,2,4-oxadiazole (3ha)

Yield: 0.061 g (81%), white solid, m. p. 106-107 °C; IR (KBr,  $\text{cm}^{-1}$ ):  $\nu = 3067, 1607, 1550, 1512, 1484, 1426, 1339, 1267, 1062, 970, 926, 887, 804, 742, 676$ ;  $^1\text{H}$  NMR (400 Hz,  $\text{CDCl}_3$ , ppm):  $\delta = 8.28$  (s, 1H), 8.14 (d, 2H,  $J = 8.0$  Hz), 8.05 (d, 2H,  $J = 8.0$  Hz), 7.60-7.54 (m, 2H), 7.49 (t, 2H,  $J = 8.0$  Hz), 7.31 (t, 1H,  $J = 8.0$  Hz);  $^{13}\text{C}$  NMR (100 Hz,  $\text{CDCl}_3$ , ppm):  $\delta = 175.90, 167.76, 134.10, 132.86, 130.48, 130.37, 129.10, 128.93, 128.15, 126.00, 124.05, 122.94$ ; HRMS (ESI) calc.  $\text{C}_{14}\text{H}_9\text{BrN}_2\text{ONa}$   $[\text{M}+\text{Na}]^+$ : 322.9790, found: 322.9796.

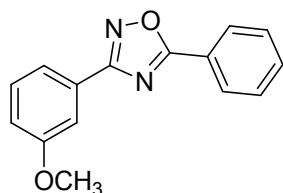

### 3-(3-Methoxyphenyl)-5-phenyl-1,2,4-oxadiazole (3ia)

Yield: 0.053 g (83%), white solid, m. p. 82-83 °C; IR (KBr,  $\text{cm}^{-1}$ ):  $\nu = 3066, 3004, 2963, 2836, 1612, 1561, 1523, 1465, 1365, 1318, 1281, 1242, 1182, 1043, 844, 795, 743, 687$ ;  $^1\text{H}$  NMR (400 Hz,  $\text{CDCl}_3$ , ppm):  $\delta = 8.19$  (d, 2H,  $J = 8.0$  Hz), 7.76 (d, 1H,  $J = 8.0$  Hz), 7.69 (s, 1H), 7.57-7.49 (m, 3H), 7.39 (t, 1H,  $J = 8.0$  Hz), 7.04 (d, 1H,  $J = 12.0$  Hz), 3.87 (s, 3H);  $^{13}\text{C}$  NMR (100 Hz,  $\text{CDCl}_3$ , ppm):  $\delta = 175.68, 168.91, 159.92, 129.96, 129.08, 128.19, 128.16, 124.31, 120.01, 117.64, 112.15, 55.43$ ; HRMS (ESI) calc.  $\text{C}_{15}\text{H}_{13}\text{N}_2\text{O}_2$   $[\text{M}+\text{H}]^+$ : 253.0972, found: 253.0970.

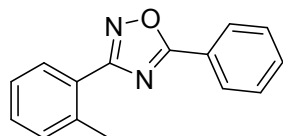

### 5-Phenyl-3-o-tolyl-1,2,4-oxadiazole (3ja)

Yield: 0.044 g (75%), white solid, m. p. 79-81 °C; IR (KBr,  $\text{cm}^{-1}$ ):  $\nu = 3036, 2922, 2850, 1610, 1561, 1516, 1480, 1449, 1348, 1278, 1171, 1115, 1066, 900, 740, 688$ ;  $^1\text{H}$  NMR (400 Hz,  $\text{CDCl}_3$ , ppm):  $\delta = 8.21$  (d, 1H,  $J = 8.0$  Hz), 8.09 (d, 1H,  $J = 8.0$  Hz), 7.61-7.52 (m, 3H), 7.42-7.34 (m, 3H), 2.68 (s, 3H);  $^{13}\text{C}$  NMR (100 Hz,  $\text{CDCl}_3$ , ppm):  $\delta = 174.73, 169.61, 138.28, 132.67, 131.38, 130.58, 130.15, 129.11, 128.18, 126.27, 126.00, 124.39, 22.11$ ; HRMS (ESI) calc.  $\text{C}_{15}\text{H}_{13}\text{N}_2\text{O}$   $[\text{M}+\text{H}]^+$ : 237.1022, found: 237.1025.

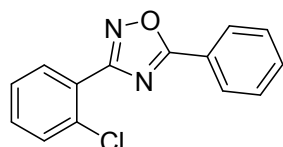

### 3-(2-Chlorophenyl)-5-phenyl-1,2,4-oxadiazole<sup>[11]</sup> (3ka)

Yield: 0.051 g (79%), white solid, m. p. 86-88 °C; IR (KBr,  $\text{cm}^{-1}$ ):  $\nu = 3071, 1610, 1561, 1491, 1347, 1278, 1092, 895, 739, 685$ ;  $^1\text{H}$  NMR (400 Hz,  $\text{CDCl}_3$ , ppm):  $\delta = 8.20$  (d, 2H,  $J = 8.0$  Hz), 8.01 (d, 1H,  $J = 8.0$  Hz), 7.61-7.51 (m, 4H), 7.44-7.37 (m,

2H);  $^{13}\text{C}$  NMR (100 Hz,  $\text{CDCl}_3$ , ppm):  $\delta = 175.28, 167.78, 133.55, 132.87, 131.79, 131.69, 130.94, 129.14, 128.21, 126.90, 126.30, 124.10$ ; HRMS (ESI) calc.  $\text{C}_{14}\text{H}_9\text{ClN}_2\text{ONa}$   $[\text{M}+\text{Na}]^+$ : 279.0296, found: 279.0300.

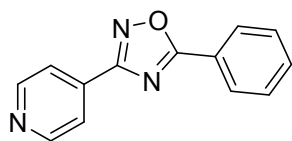

#### 4-(5-Phenyl-1,2,4-oxadiazol-3-yl)pyridine (3la)

Yield: 0.034 g (61%), white solid, m. p. 152-153 °C; IR (KBr,  $\text{cm}^{-1}$ ):  $\nu = 3006, 1605, 1548, 1517, 1486, 1412, 1366, 1308, 1268, 1137, 1060, 743, 680$ ;  $^1\text{H}$  NMR (400 Hz,  $\text{CDCl}_3$ , ppm):  $\delta = 8.80$  (d, 2H,  $J = 4.0$  Hz), 8.20 (d, 2H,  $J = 8.0$  Hz), 8.02 (d, 2H,  $J = 4.0$  Hz), 7.62-7.53 (m, 3H);  $^{13}\text{C}$  NMR (100 Hz,  $\text{CDCl}_3$ , ppm):  $\delta = 176.46, 167.41, 150.62, 134.43, 133.10, 129.19, 128.20, 123.83, 121.32$ ; HRMS (ESI) calc.  $\text{C}_{13}\text{H}_{10}\text{N}_3\text{O}$   $[\text{M}+\text{H}]^+$ : 224.0818, found: 224.0820.

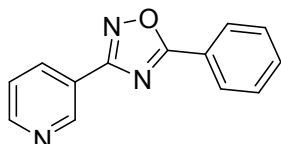

#### 3-(5-Phenyl-1,2,4-oxadiazol-3-yl)pyridine<sup>[12]</sup> (3ma)

Yield: 0.035 g (63%), white solid, m. p. 140-141 °C; IR (KBr,  $\text{cm}^{-1}$ ):  $\nu = 3065, 1587, 1551, 1445, 140, 1364, 1272, 1187, 1063, 1019, 967, 787, 734, 687$ ;  $^1\text{H}$  NMR (400 Hz,  $\text{CDCl}_3$ , ppm):  $\delta = 9.39$  (s, 1H), 8.76 (d, 1H,  $J = 4.0$  Hz), 8.42 (d, 1H,  $J = 4.0$  Hz), 8.19 (d, 2H,  $J = 8.0$  Hz), 7.62-7.52 (m, 3H), 7.43 (t, 1H,  $J = 8.0$  Hz);  $^{13}\text{C}$  NMR (100 Hz,  $\text{CDCl}_3$ , ppm):  $\delta = 176.11, 166.98, 151.98, 148.69, 134.70, 132.98, 129.14, 128.18, 123.92, 123.61, 123.25$ ; HRMS (ESI) calc.  $\text{C}_{13}\text{H}_{10}\text{N}_3\text{O}$   $[\text{M}+\text{H}]^+$ : 224.0818, found: 224.0821.

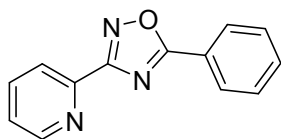

#### 2-(5-Phenyl-1,2,4-oxadiazol-3-yl)pyridine<sup>[10]</sup> (3na)

Yield: 0.033 g (59%), white solid, m. p. 131-132 °C; IR (KBr,  $\text{cm}^{-1}$ ):  $\nu = 3066, 1610, 1557, 1514, 1489, 1447, 1366, 1278, 1156, 1039, 925, 50, 723$ ;  $^1\text{H}$  NMR (400 Hz,  $\text{CDCl}_3$ , ppm):  $\delta = 8.84$  (d, 1H,  $J = 4.0$  Hz), 8.27 (d, 2H,  $J = 8.0$  Hz), 8.21 (d, 1H,  $J = 8.0$  Hz), 7.86 (t, 1H,  $J = 8.0$  Hz), 7.58-7.52 (m, 3H), 7.44 (m, 1H);  $^{13}\text{C}$  NMR (100 Hz,  $\text{CDCl}_3$ , ppm):  $\delta = 176.43, 168.75, 150.40, 146.45, 137.02, 132.91, 129.06, 128.29, 125.48, 123.98, 123.24$ ; HRMS (ESI) calc.  $\text{C}_{13}\text{H}_{10}\text{N}_3\text{O}$   $[\text{M}+\text{H}]^+$ : 224.0818, found: 224.0818.

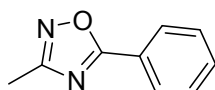

### 3-Methyl-5-phenyl-1,2,4-oxadiazole<sup>[13]</sup> (3oa)

Yield: 0.030 g (75%), white solid, m. p. 57-58 °C; IR (KBr, cm<sup>-1</sup>):  $\nu$  = 3064, 2923, 2851, 1613, 1562, 1448, 1395, 1342, 1274, 1101, 1070, 786, 722, 688; <sup>1</sup>H NMR (400 Hz, CDCl<sub>3</sub>, ppm):  $\delta$  = 8.11 (d, 2H,  $J$  = 8.0 Hz), 7.60-7.49 (m, 3H), 2.47 (s, 3H); <sup>13</sup>C NMR (100 Hz, CDCl<sub>3</sub>, ppm):  $\delta$  = 175.42, 167.77, 132.62, 129.07, 127.99, 124.23, 11.69; HRMS (ESI) calc. C<sub>9</sub>H<sub>9</sub>N<sub>2</sub>O [M+H]<sup>+</sup>: 161.0709, found: 161.0707.

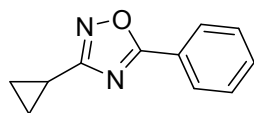

### 3-Cyclopropyl-5-phenyl-1,2,4-oxadiazole (3pa)

Yield: 0.034 g (73%), pale yellow oil; IR (KBr, cm<sup>-1</sup>):  $\nu$  = 3095, 3065, 3013, 2930, 2850, 1614, 1563, 1530, 1485, 1451, 1376, 1279, 1248, 1179, 1116, 1060, 905, 822, 788, 743, 697; <sup>1</sup>H NMR (400 Hz, CDCl<sub>3</sub>, ppm):  $\delta$  = 8.05 (d, 2H,  $J$  = 4.0 Hz), 7.53-7.43 (m, 3H), 2.14-2.11 (m, 1H), 1.11-1.05 (m, 4H); <sup>13</sup>C NMR (100 Hz, CDCl<sub>3</sub>, ppm):  $\delta$  = 175.02, 172.90, 132.39, 128.90, 127.91, 124.34, 7.70, 6.90; HRMS (ESI) calc. C<sub>11</sub>H<sub>10</sub>N<sub>2</sub>O<sub>Na</sub> [M+Na]<sup>+</sup>: 209.0685, found: 209.0685.

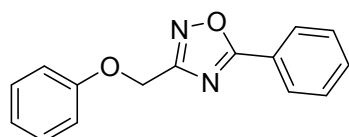

### 3-(Phenoxy)methyl-5-phenyl-1,2,4-oxadiazole (3qa)

Yield: 0.047 g (68%), white solid, m. p. 67-69 °C; IR (KBr, cm<sup>-1</sup>):  $\nu$  = 3066, 2931, 2861, 1598, 1561, 1491, 1451, 1397, 1352, 1301, 1242, 1076, 754, 722, 689; <sup>1</sup>H NMR (400 Hz, CDCl<sub>3</sub>, ppm):  $\delta$  = 8.09 (d, 2H,  $J$  = 8.0 Hz), 7.51 (t, 1H,  $J$  = 8.0 Hz), 7.44 (t, 2H,  $J$  = 8.0 Hz), 7.27 (t, 2H,  $J$  = 8.0 Hz), 7.04 (d, 2H,  $J$  = 8.0 Hz), 6.97 (t, 1H,  $J$  = 8.0 Hz), 5.21 (s, 2H); <sup>13</sup>C NMR (100 Hz, CDCl<sub>3</sub>, ppm):  $\delta$  = 176.40, 167.50, 158.06, 133.02, 129.64, 129.14, 128.23, 123.89, 121.85, 114.98, 61.23; HRMS (ESI) calc. C<sub>15</sub>H<sub>12</sub>N<sub>2</sub>O<sub>2</sub>Na [M+Na]<sup>+</sup>: 275.0791, found: 275.0796.

## E. References

1. J. K. Augustine, V. Akabote, S. G. Hegde and P. Alagarsamy, *J. Org. Chem.*, 2009, **74**, 5640-5643.
2. B. Kaboudin and L. Malekzadeh, *Tetrahedron Lett.*, 2011, **52**, 6424-6426.
3. S. Rostamizadeh, H. R. Ghaieni, R. Aryan and A. M. Amani, *Tetrahedron*, 2010, **66**, 494-497.
4. Adib, M.; Jahromi, A. H.; Tavoosi, N.; Mahdavi, M.; Bijanzadeh, H. R. *Tetrahedron Lett.*, 2006, **47**, 2965-2967.
5. J. K. Augustine, V. Vairaperumal, S. Narasimhan, P. Alagarsamy, A. Radhakrishnan, *Tetrahedron*, 2009, **65**, 9989-9996.
6. L. Giuseppe and P. Diazofurans. Maria, *Annali di Chimica (Rome, Italy)*. 1957, **47**, 376-384.
7. R. L. N. Harris and J. L. Huppertz, *Aust. J. Chem.*, 1977, **30**, 2225-2240.
8. S. Chiou and H. J. Shine, *J. Heterocycl. Chem.*, 1989, **26**, 125-128.
9. H. Kazuho, K. Eisuke and Z. Shonosuke, *Chem. Pharm. Bull.*, 1980, **28**, 3296-3303.
10. D. Grant, R. Dahl and N. D. P. Cosford, *J. Org. Chem.*, 2008, **73**, 7219-7223.
11. A. Romdhane, R. Gharbi and Z. Mighri, *Heterocyc. Commun.*, 2004, **10**, 151-156.
12. C. S. Naveena, P. L. Lobo, B. Poojary and N. S. Kumari, *Org. Chem. Indian J.*, 2010, **6**, 154-159.
13. T. E. Young and W. T. Beidler, *J. Org. Chem.*, 1985, **50**, 1182-1186.

## F. NMR spectra for all compounds



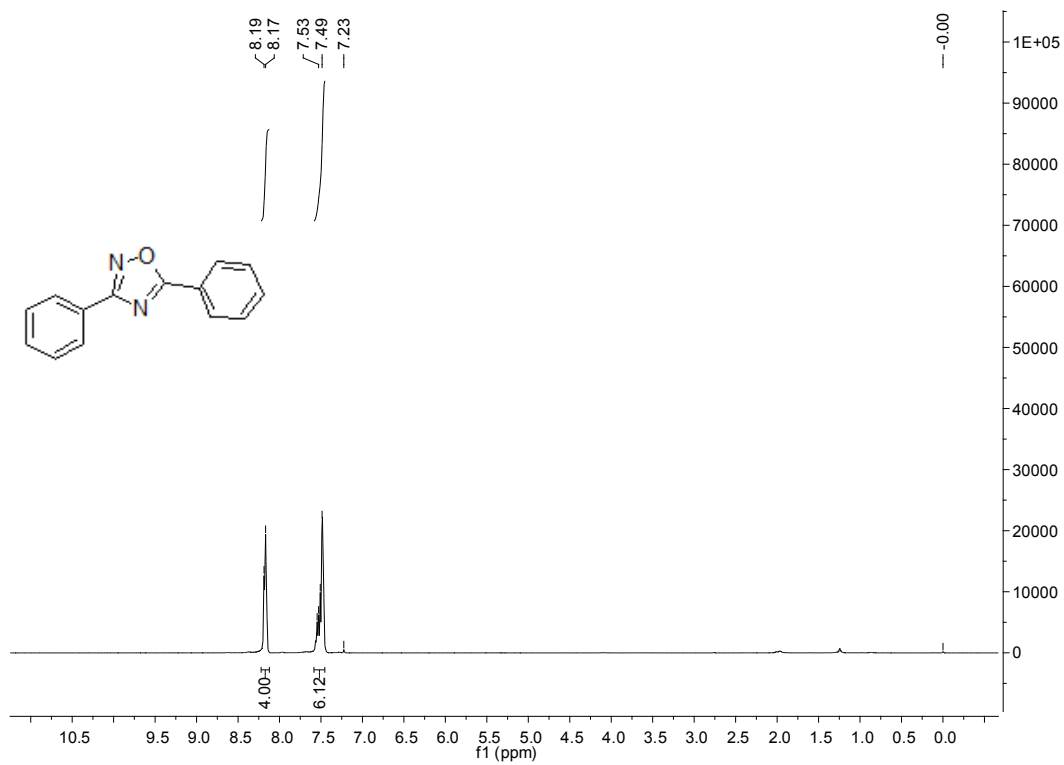

<sup>1</sup>H NMR of **3aa**

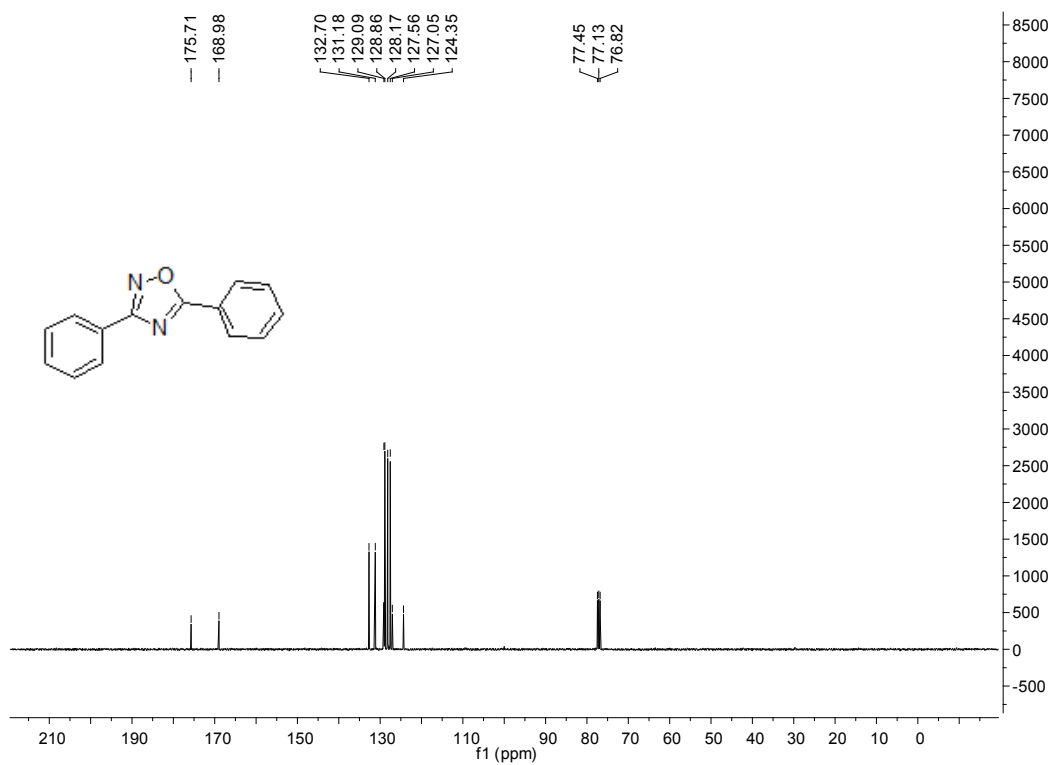

<sup>13</sup>C NMR of **3aa**

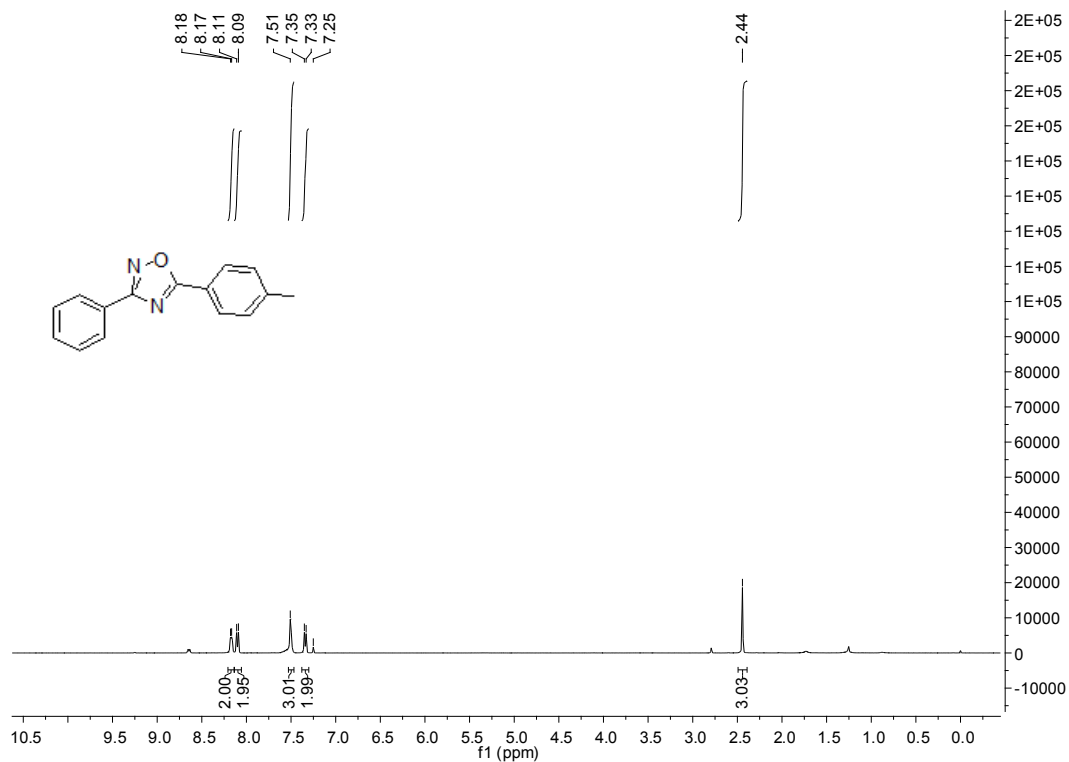

**<sup>1</sup>H NMR of 3ab**

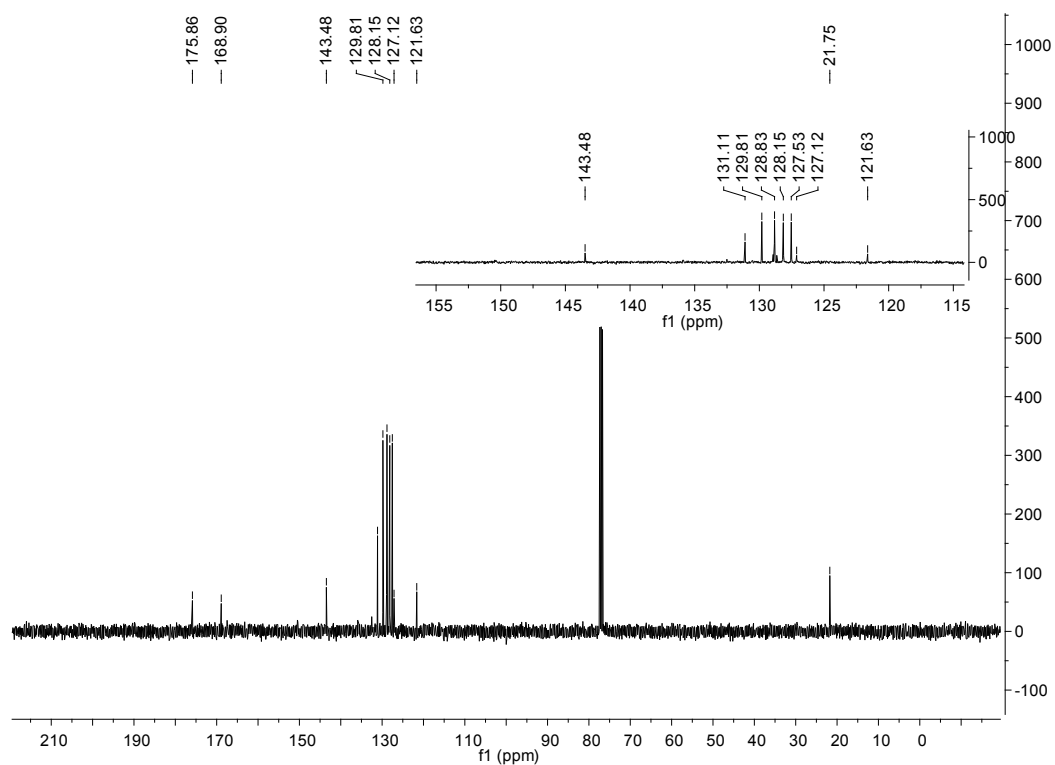

**<sup>13</sup>C NMR of 3ab**

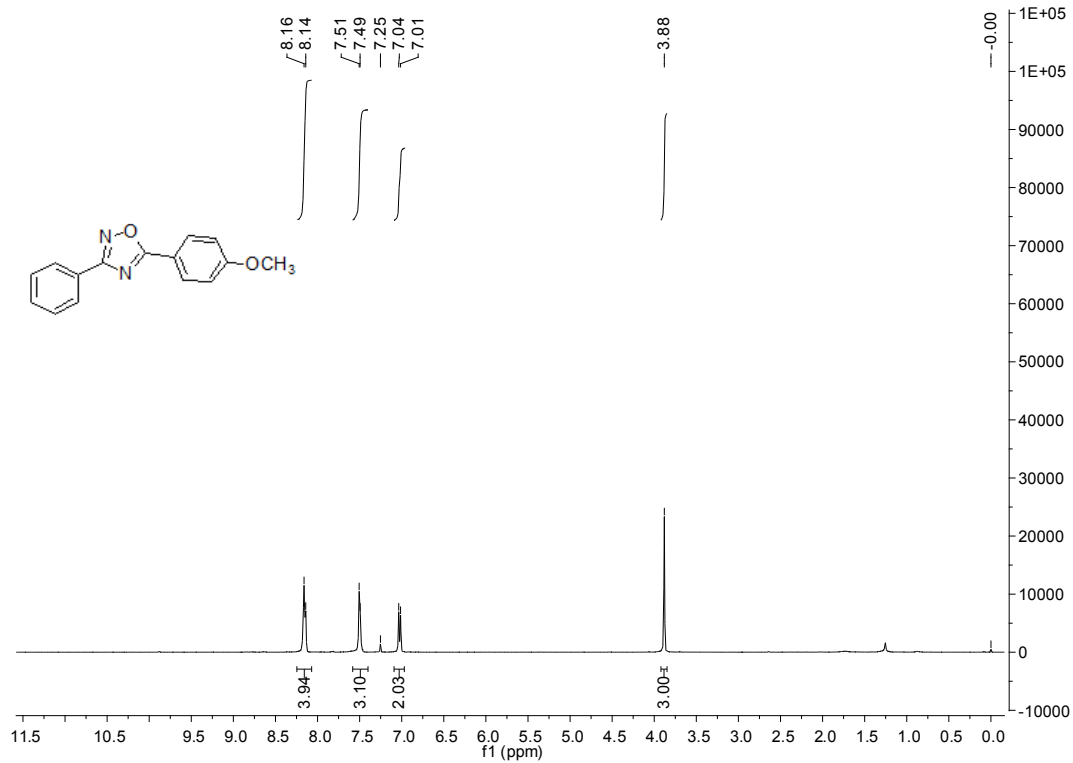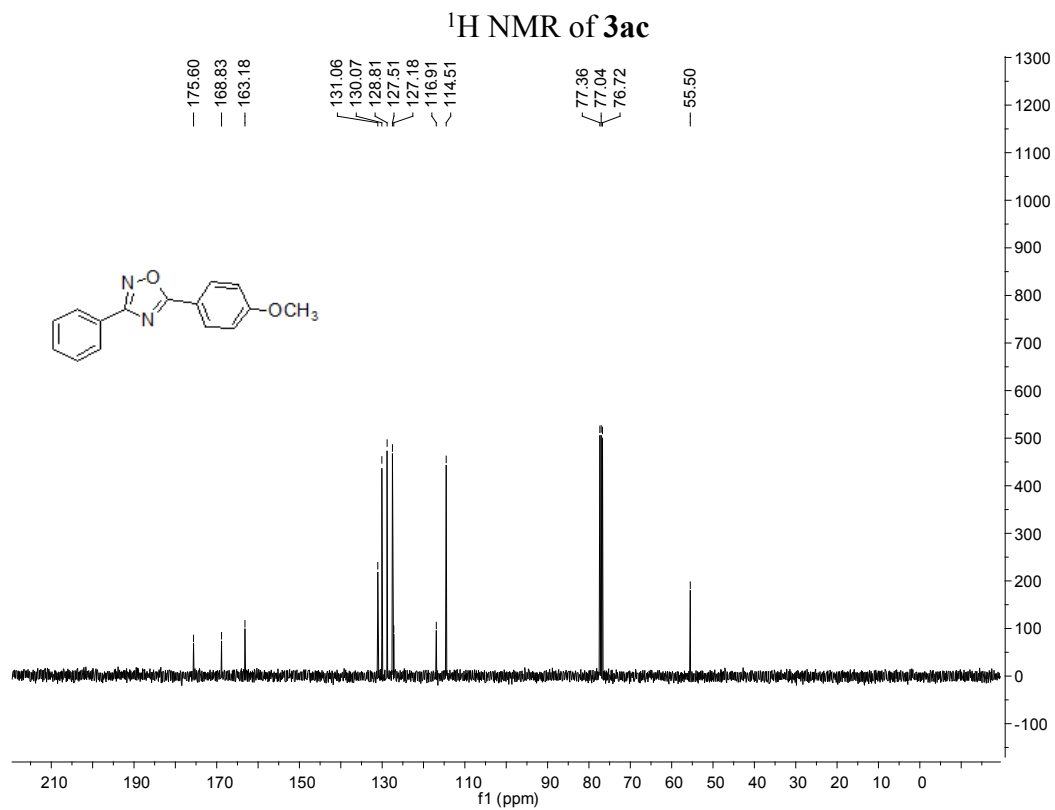

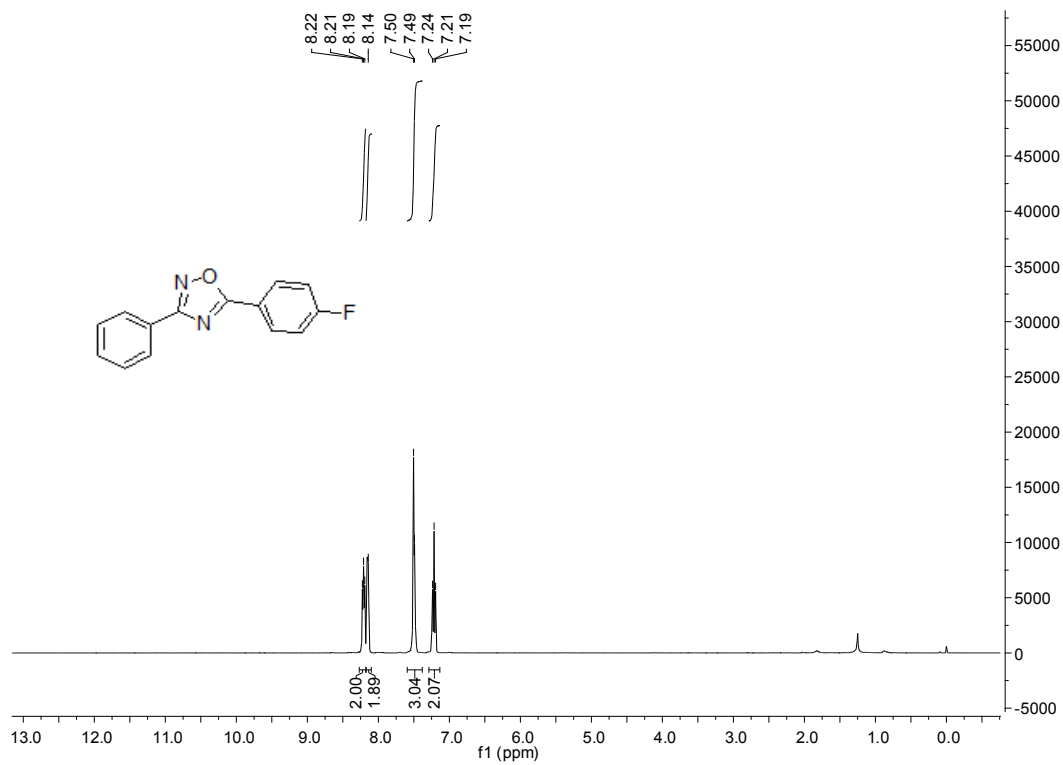

<sup>1</sup>H NMR of **3ad**

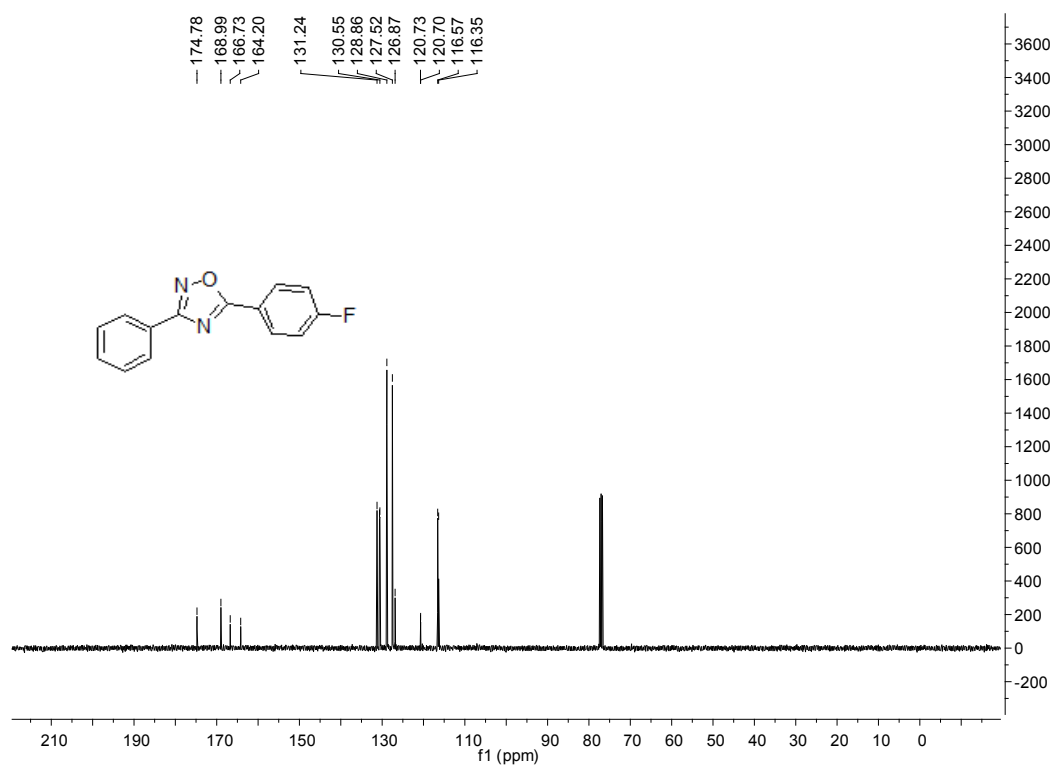

<sup>13</sup>C NMR of **3ad**

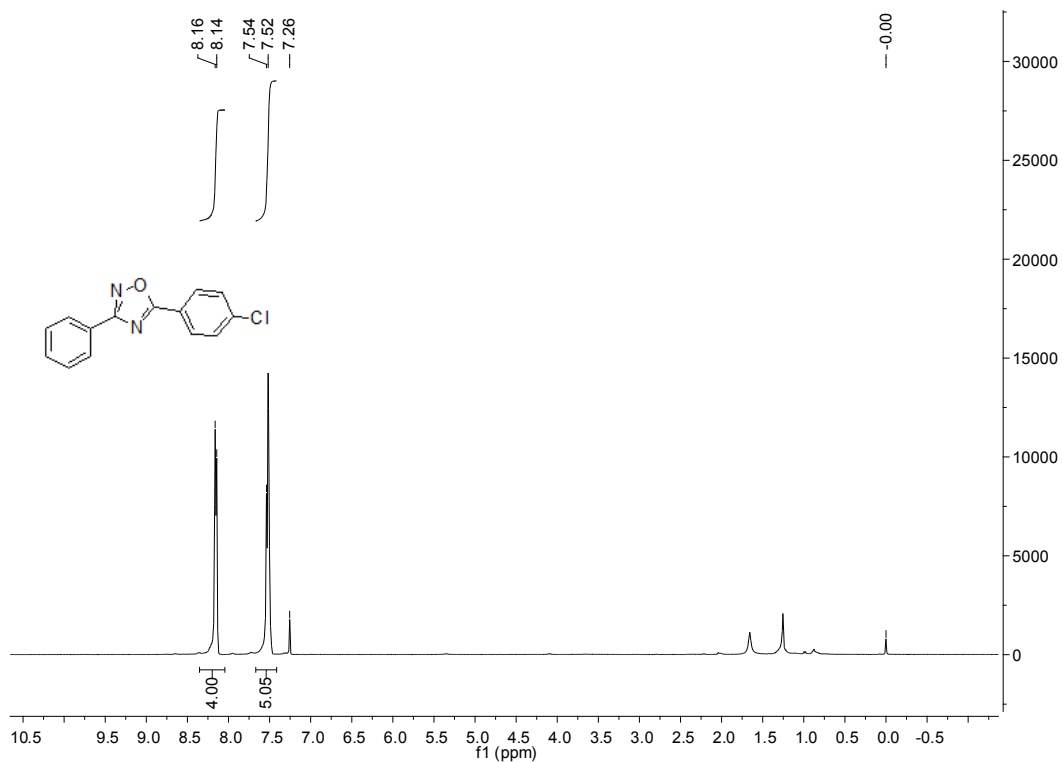

$^1\text{H NMR}$  of 3ae

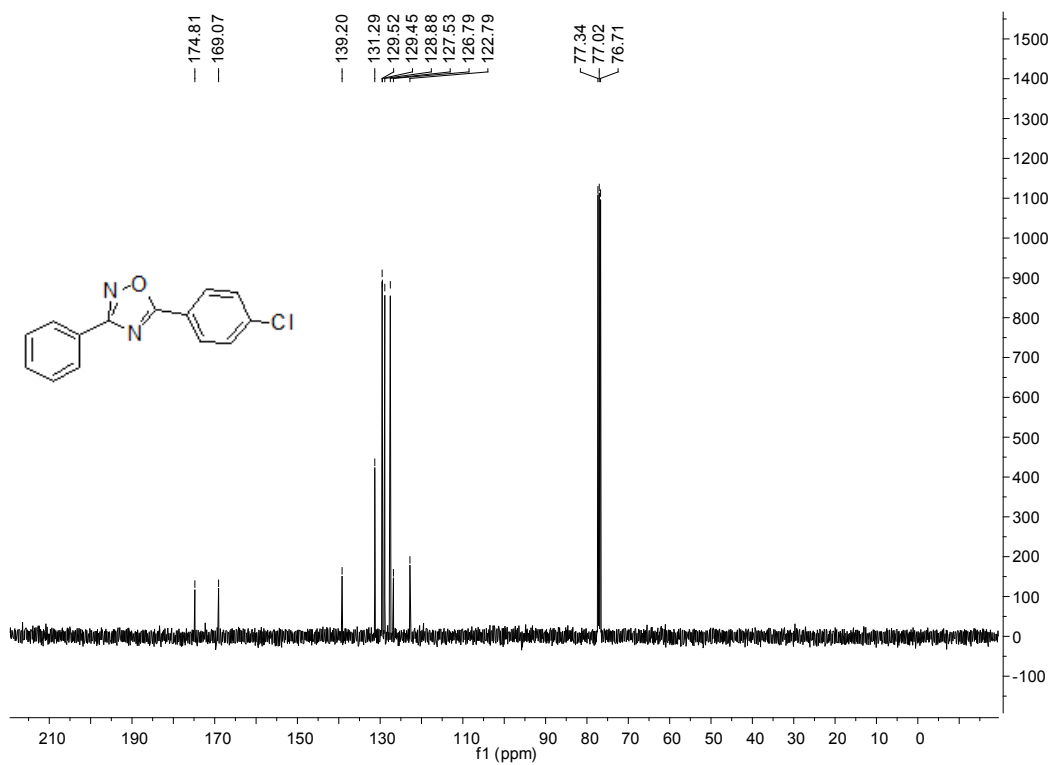

$^{13}\text{C NMR}$  of 3ae

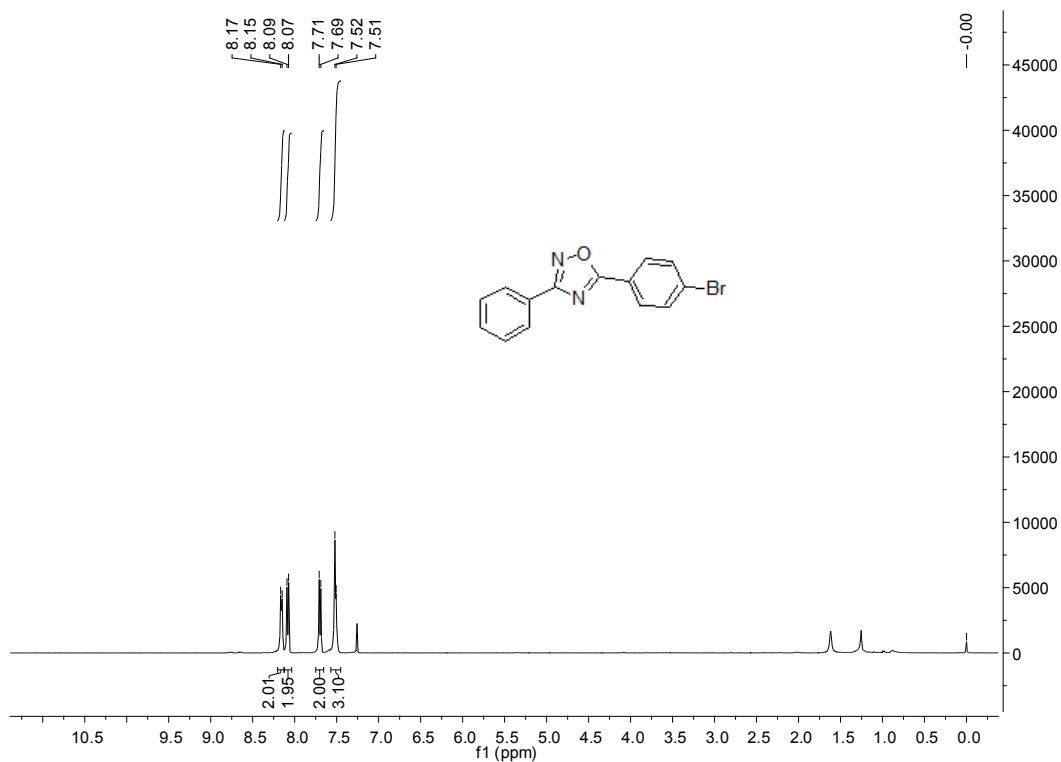

**<sup>1</sup>H NMR of 3af**

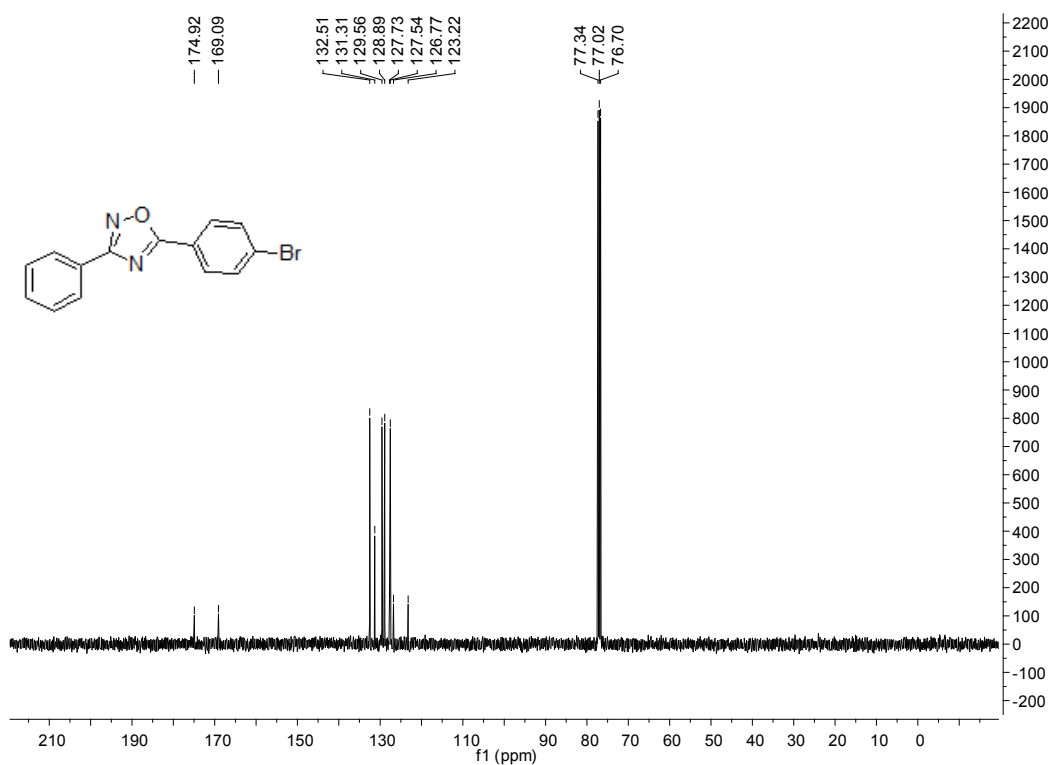

**<sup>13</sup>C NMR of 3af**

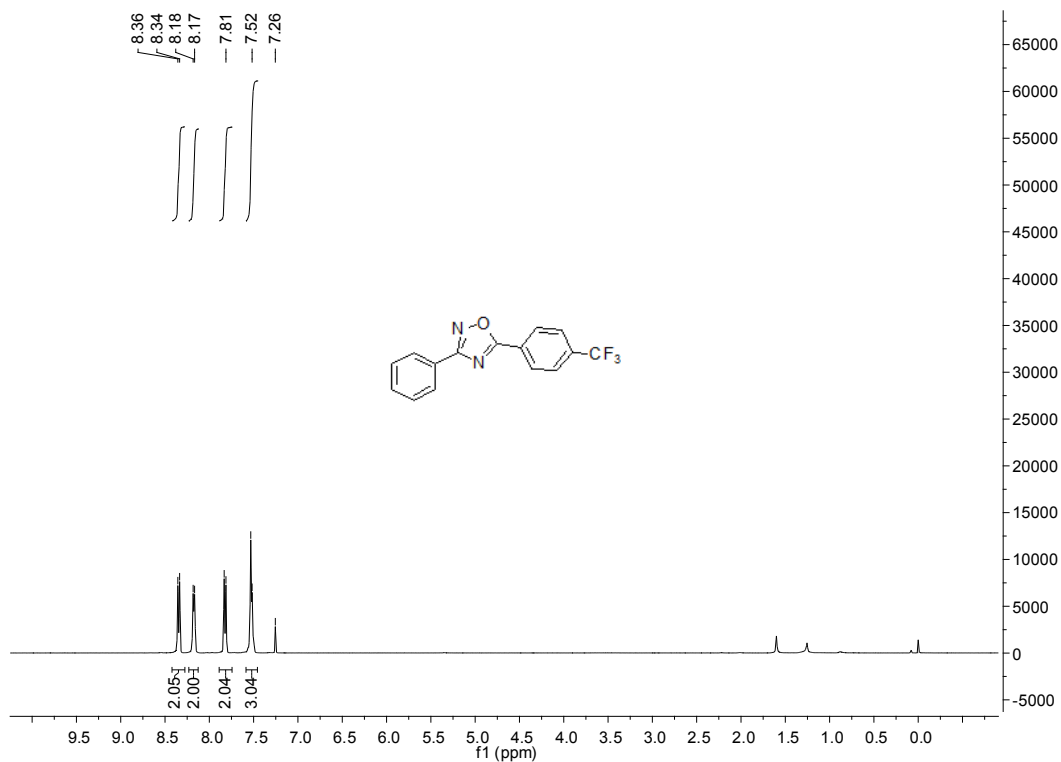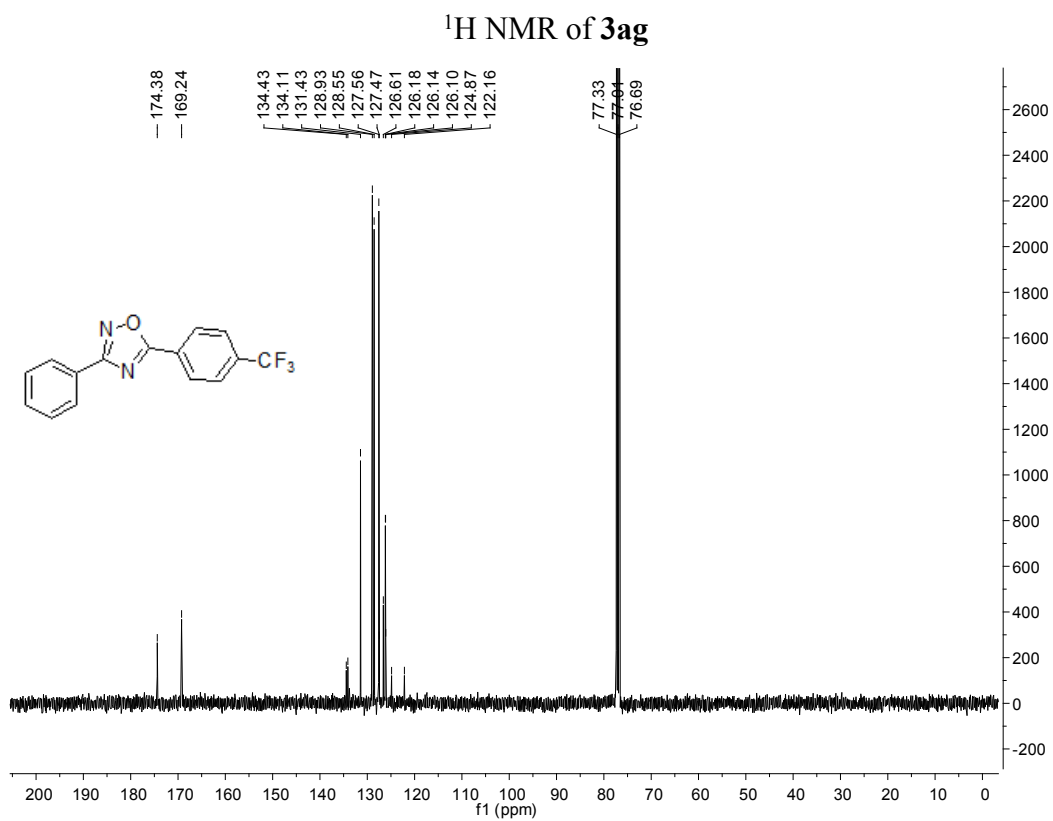

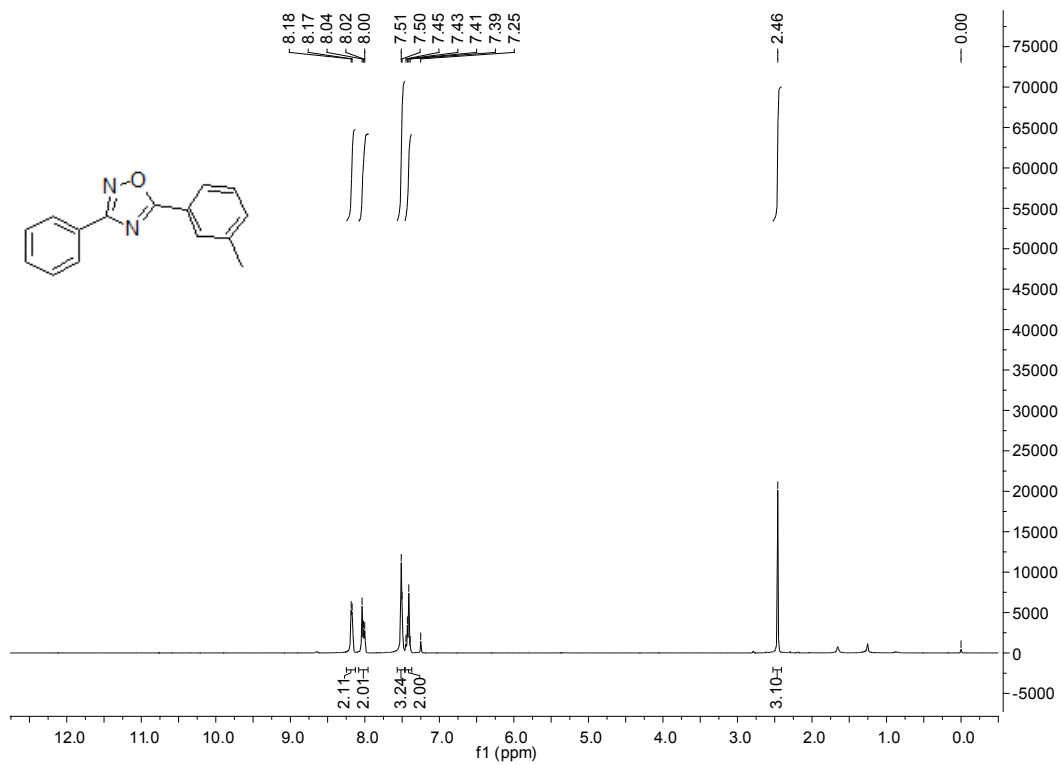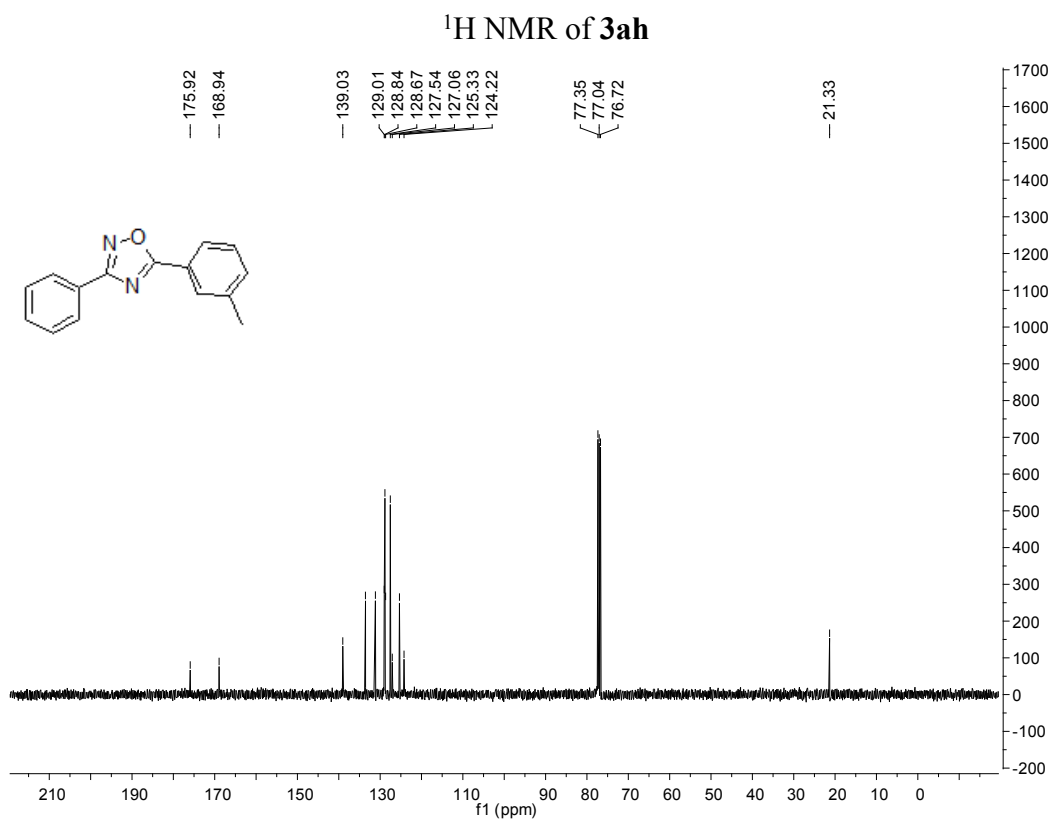



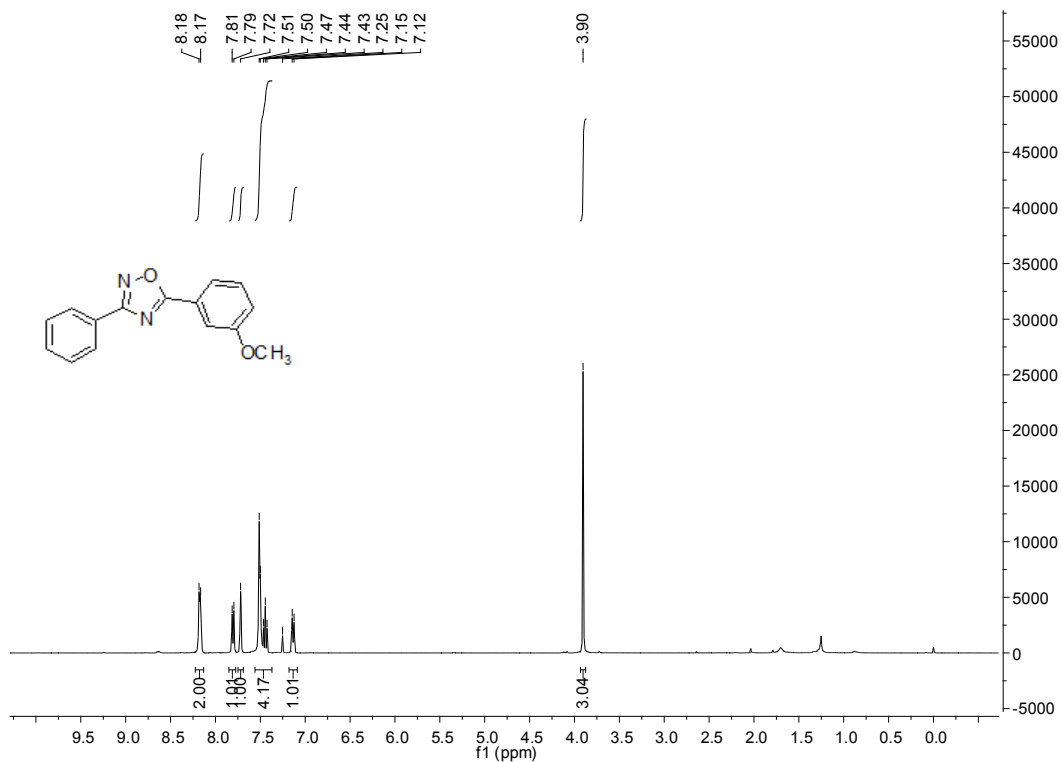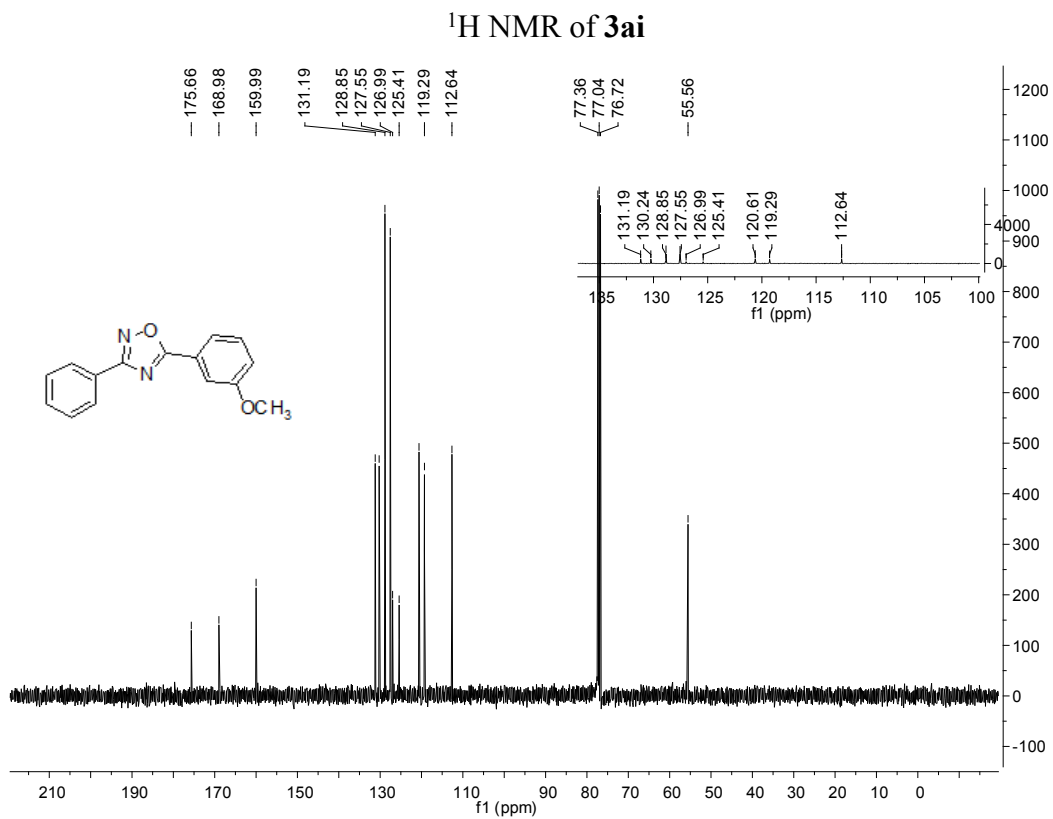

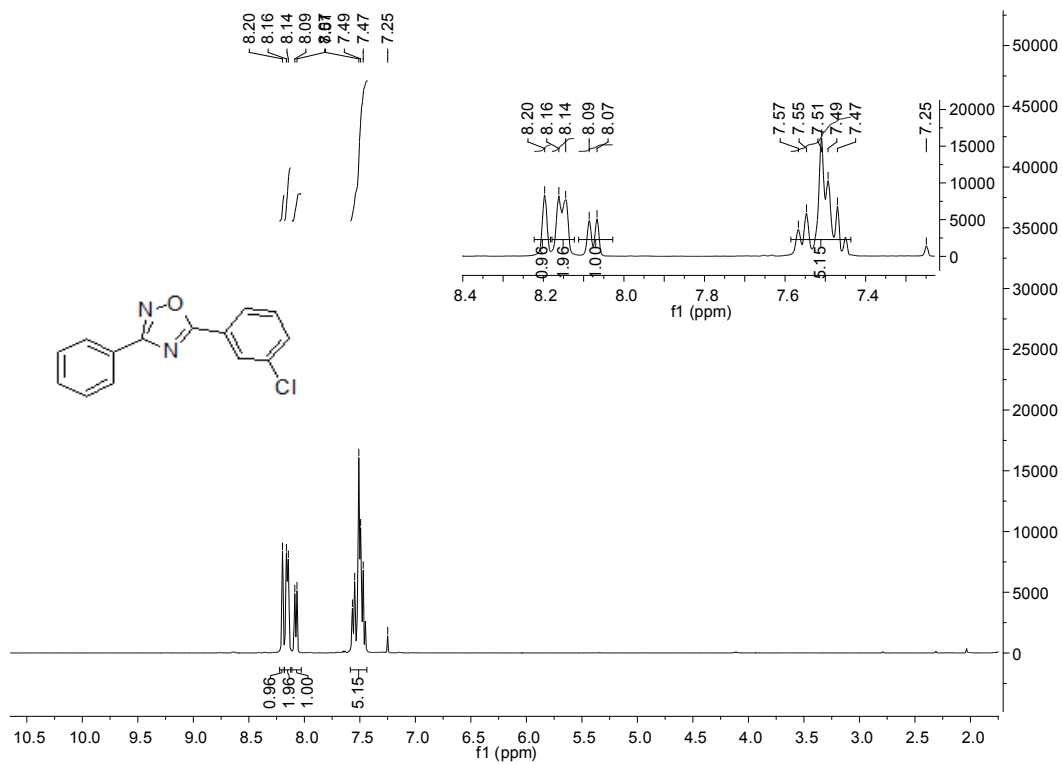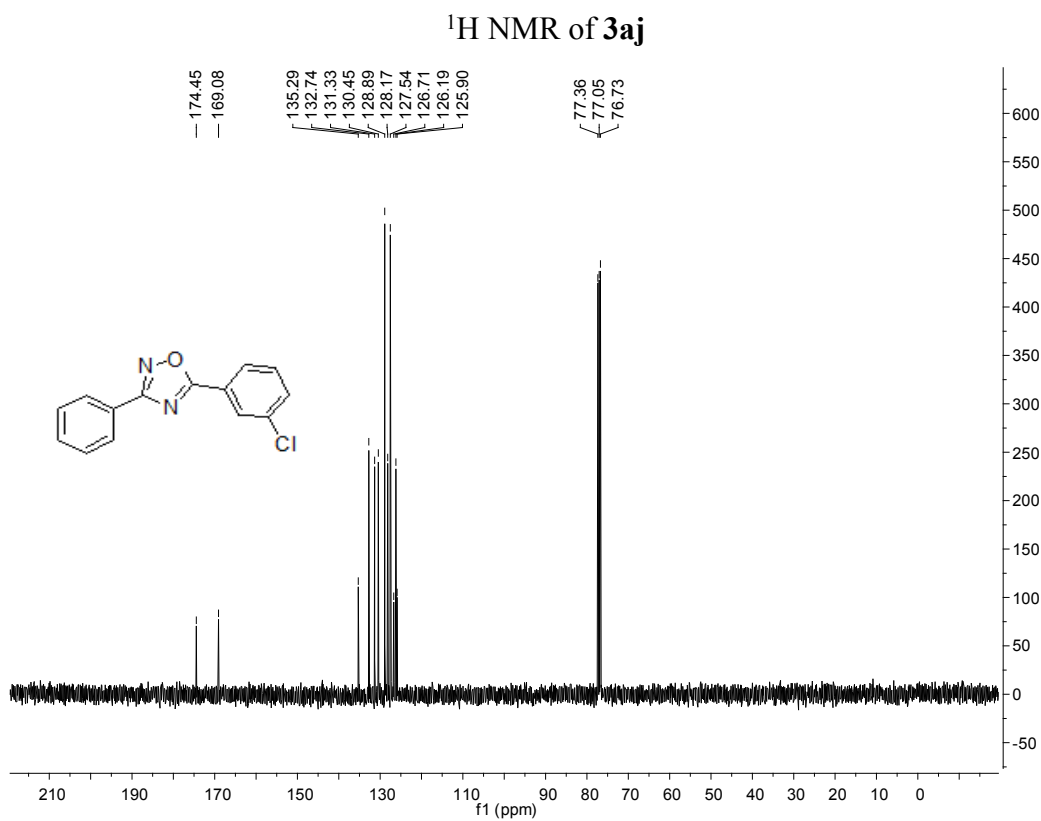

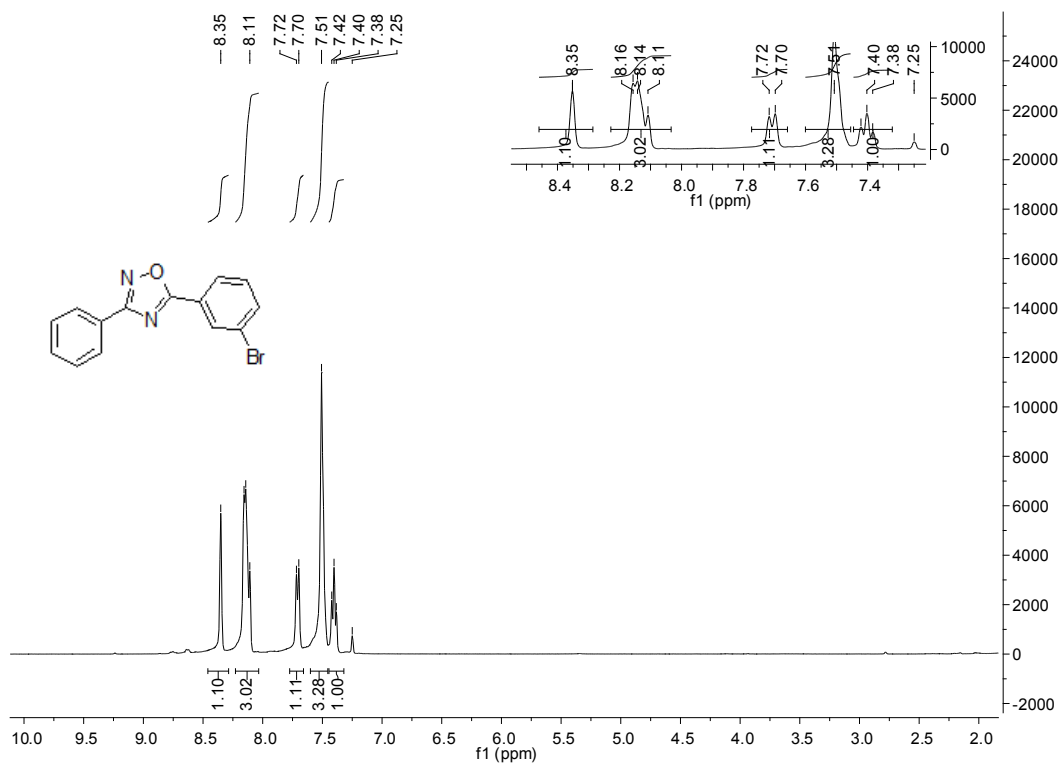

**<sup>1</sup>H NMR of 3ak**

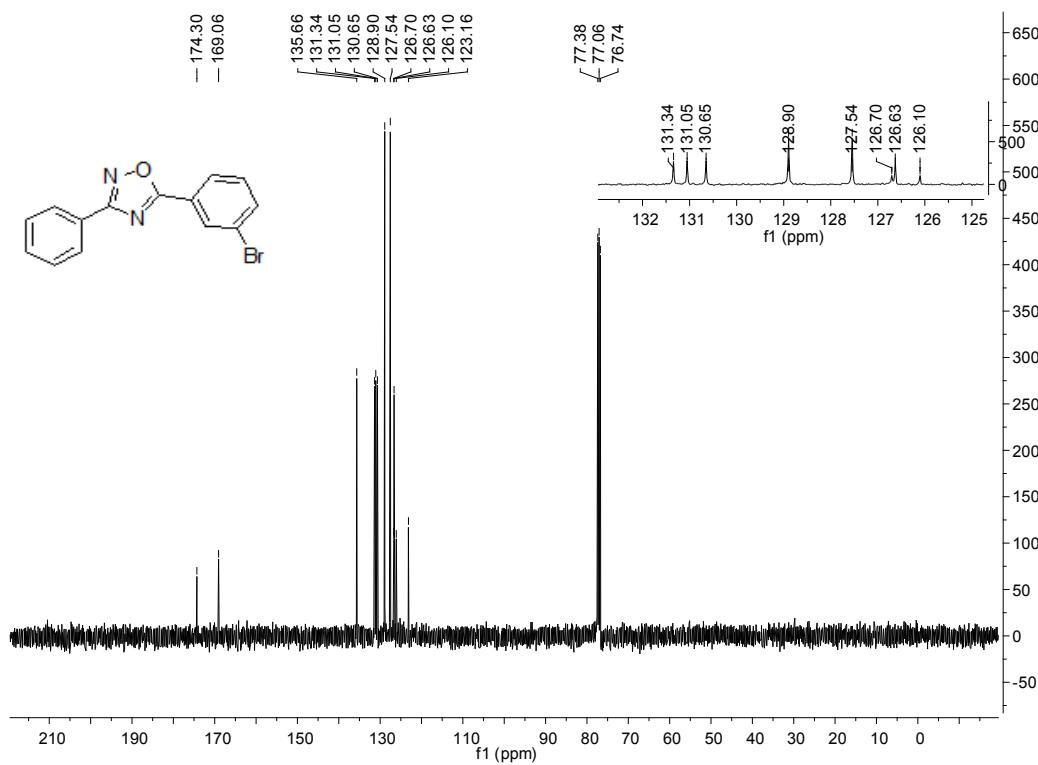

**<sup>13</sup>C NMR of 3ak**

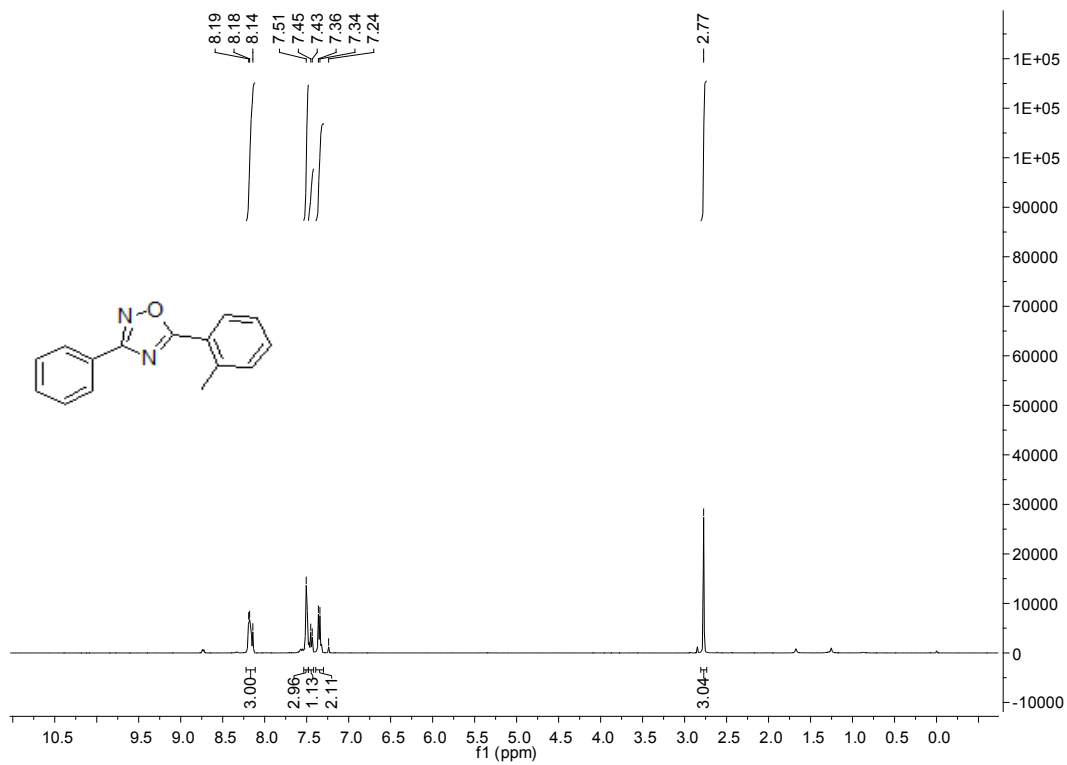

**<sup>1</sup>H NMR of 3al**

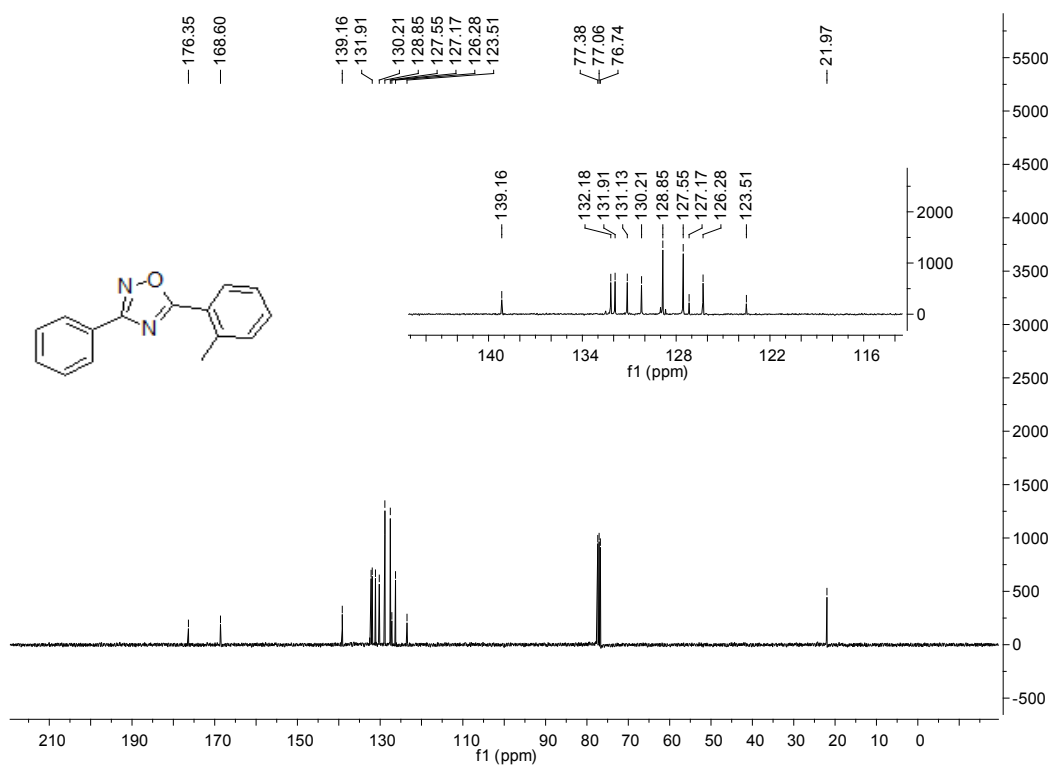

**<sup>13</sup>C NMR of 3al**

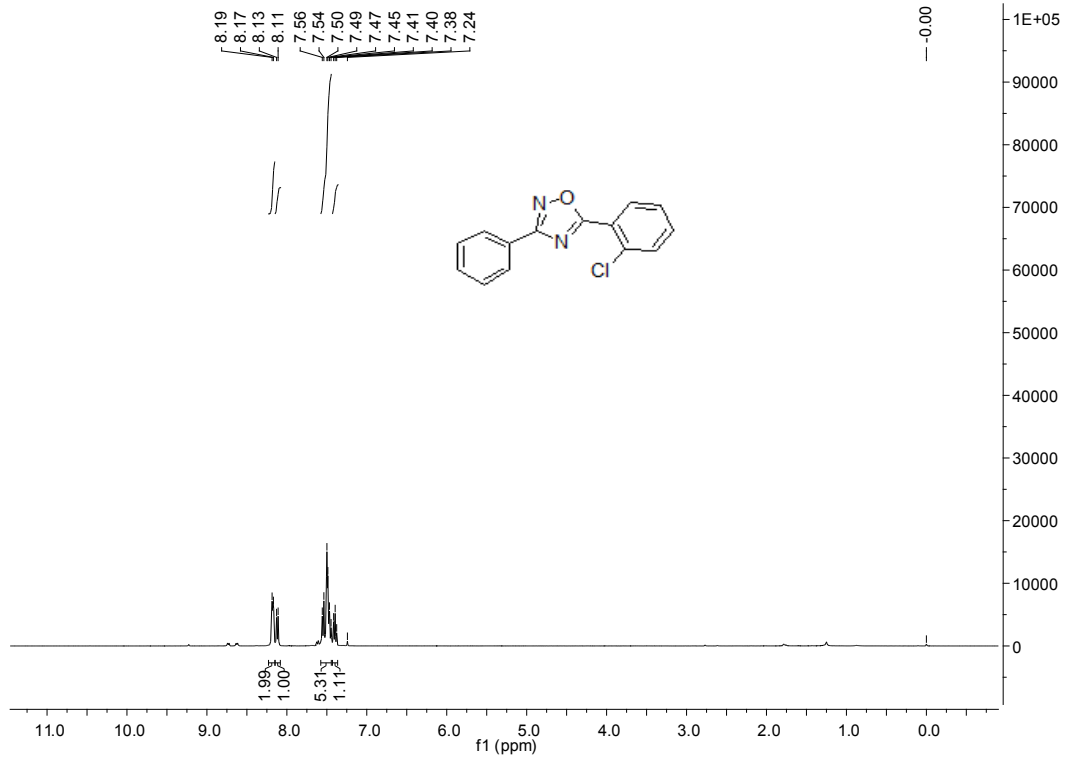

$^1\text{H NMR}$  of 3am

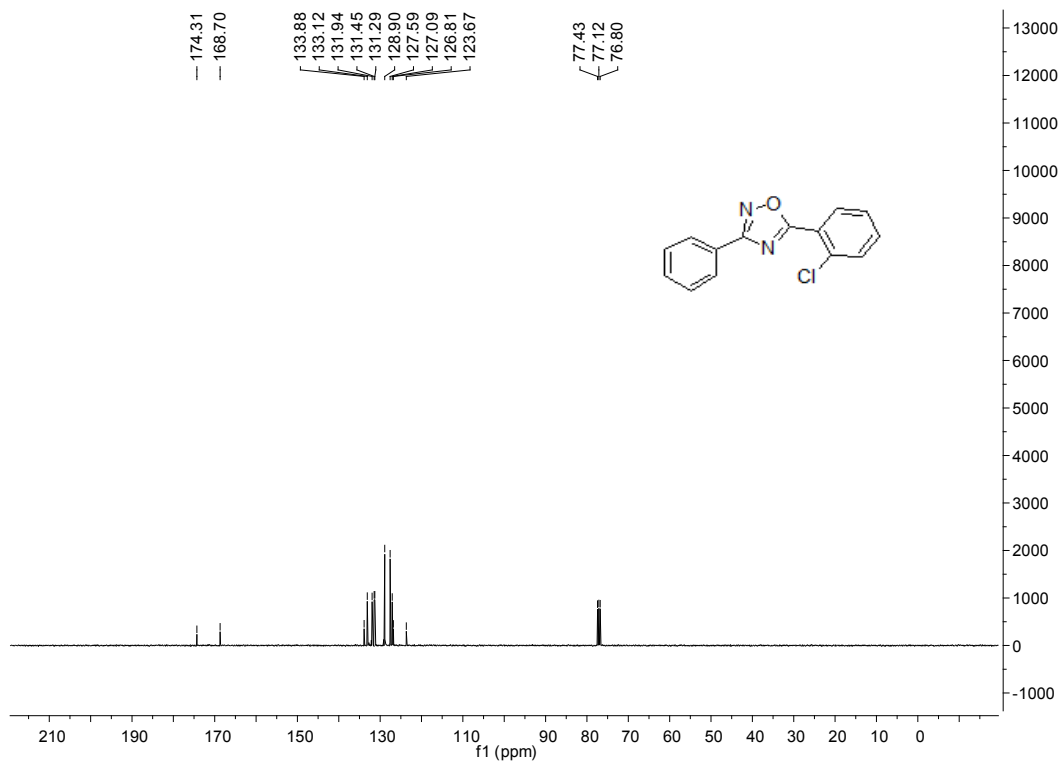

$^{13}\text{C NMR}$  of 3am

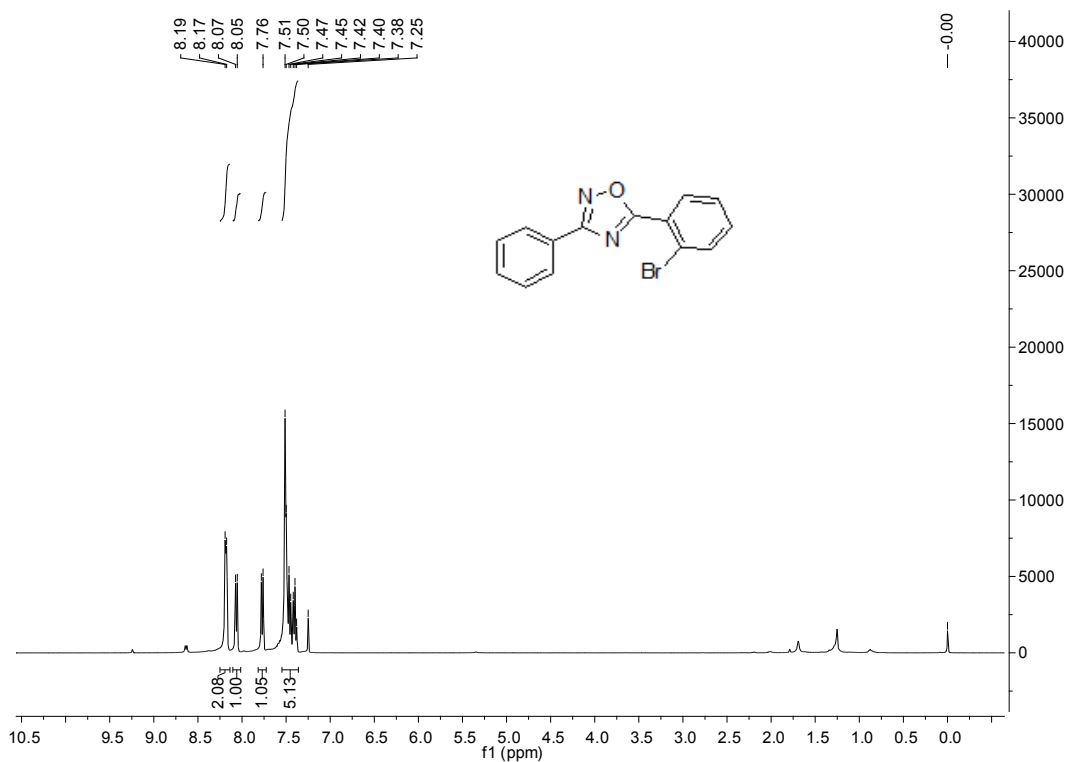

**<sup>1</sup>H NMR of 3an**

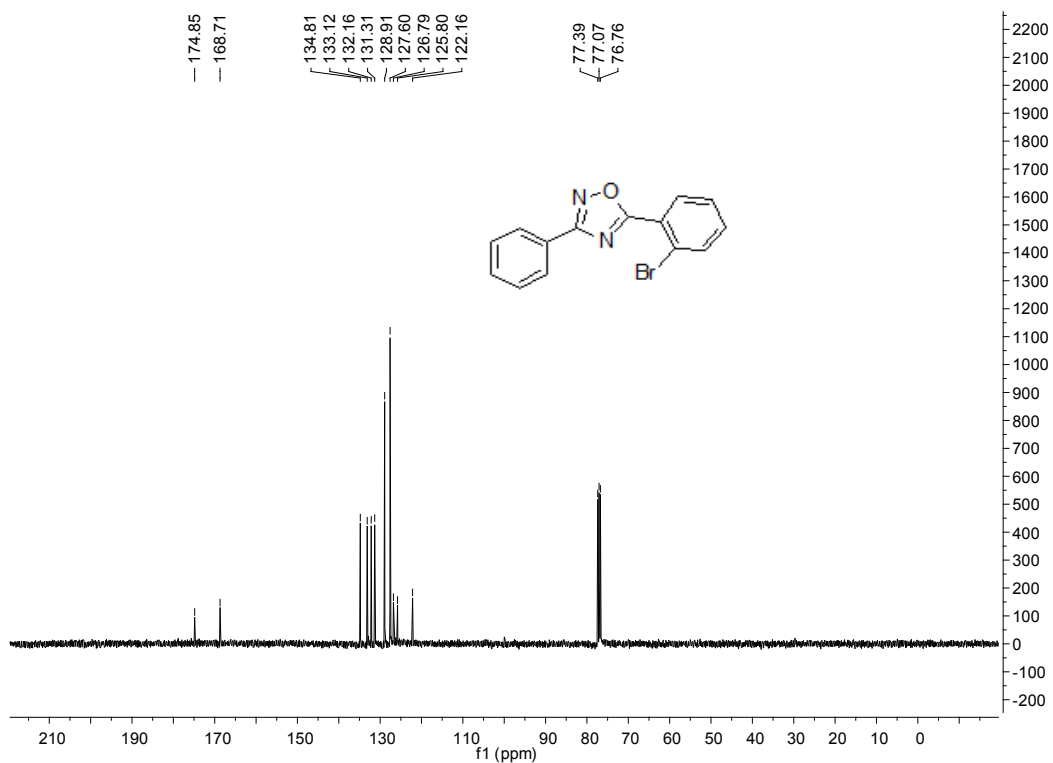

**<sup>13</sup>C NMR of 3an**

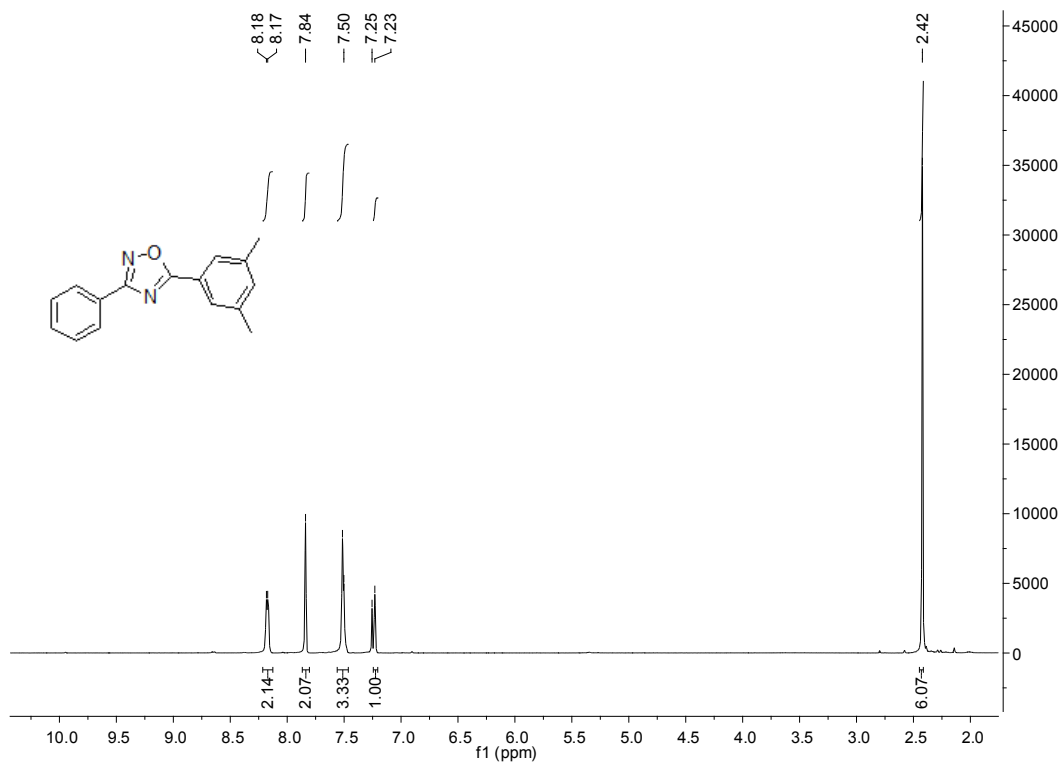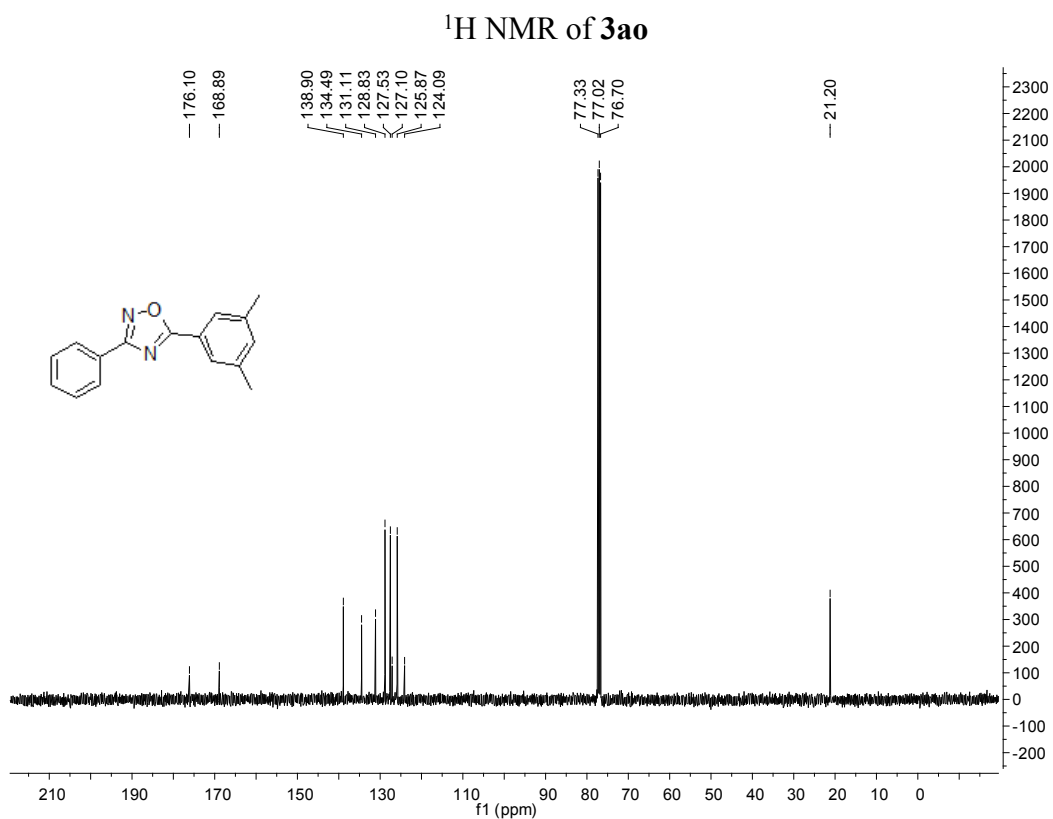

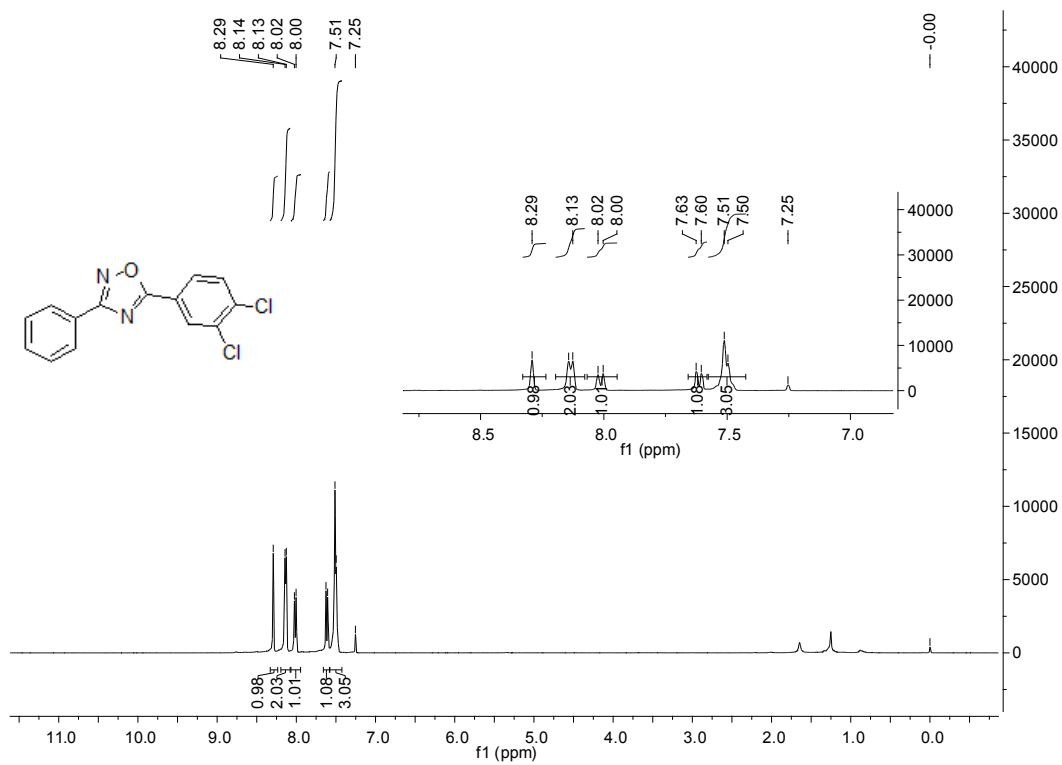

**<sup>1</sup>H NMR of 3ap**

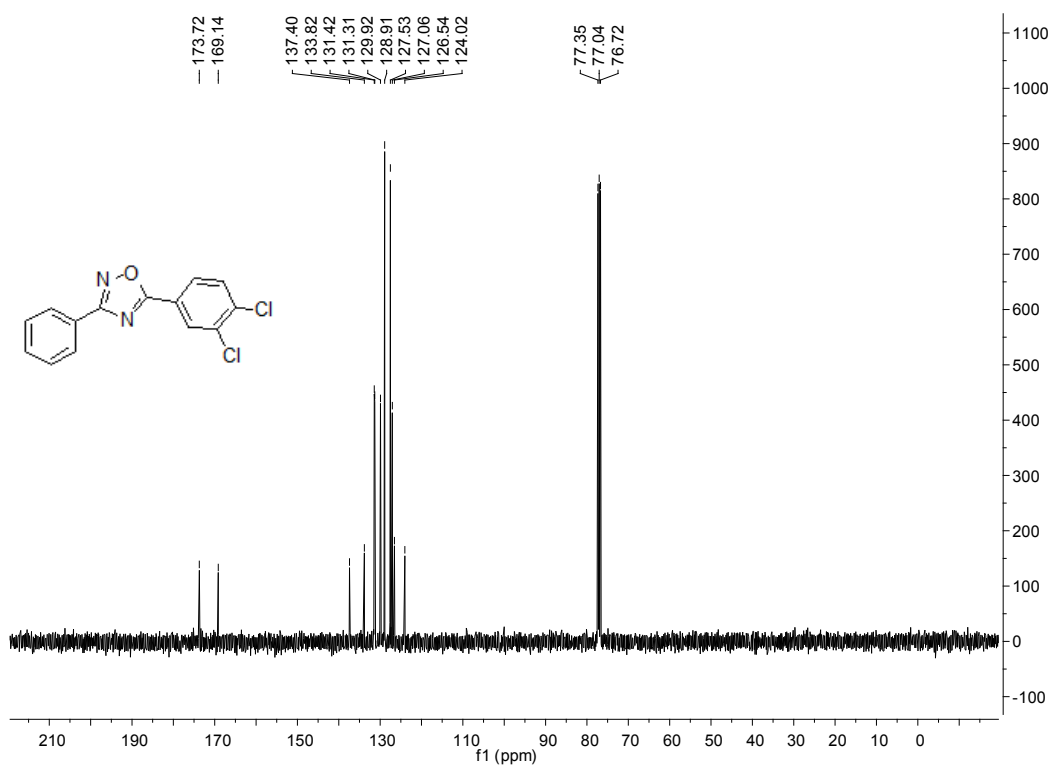

**<sup>13</sup>C NMR of 3ap**



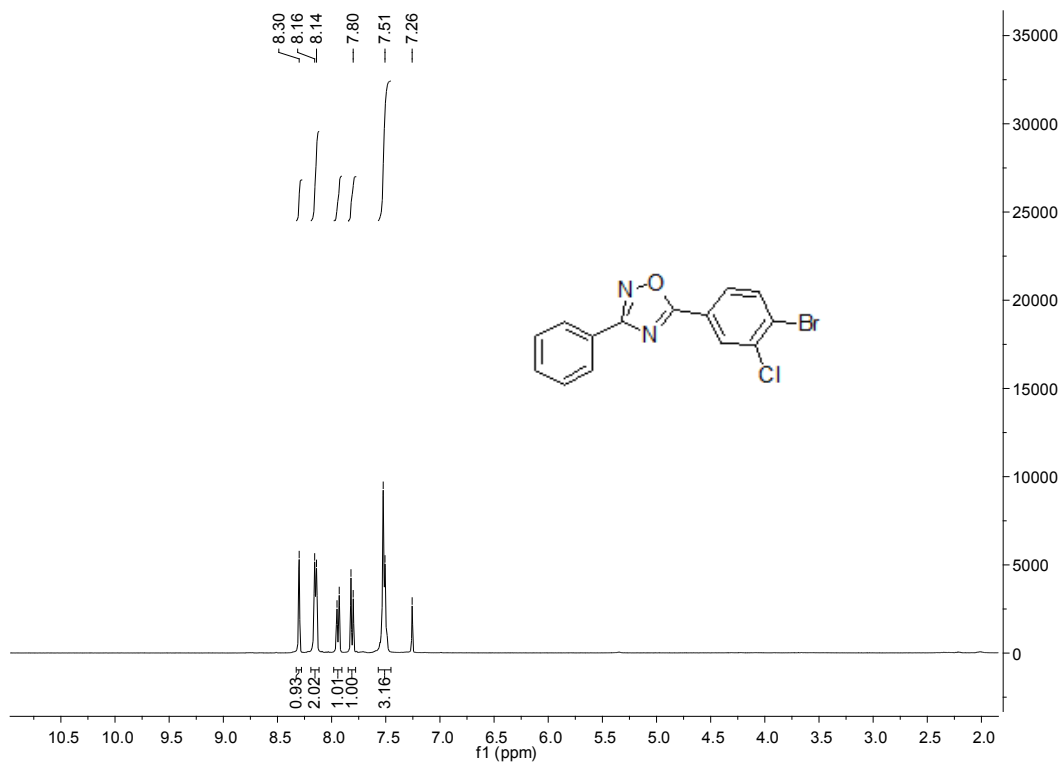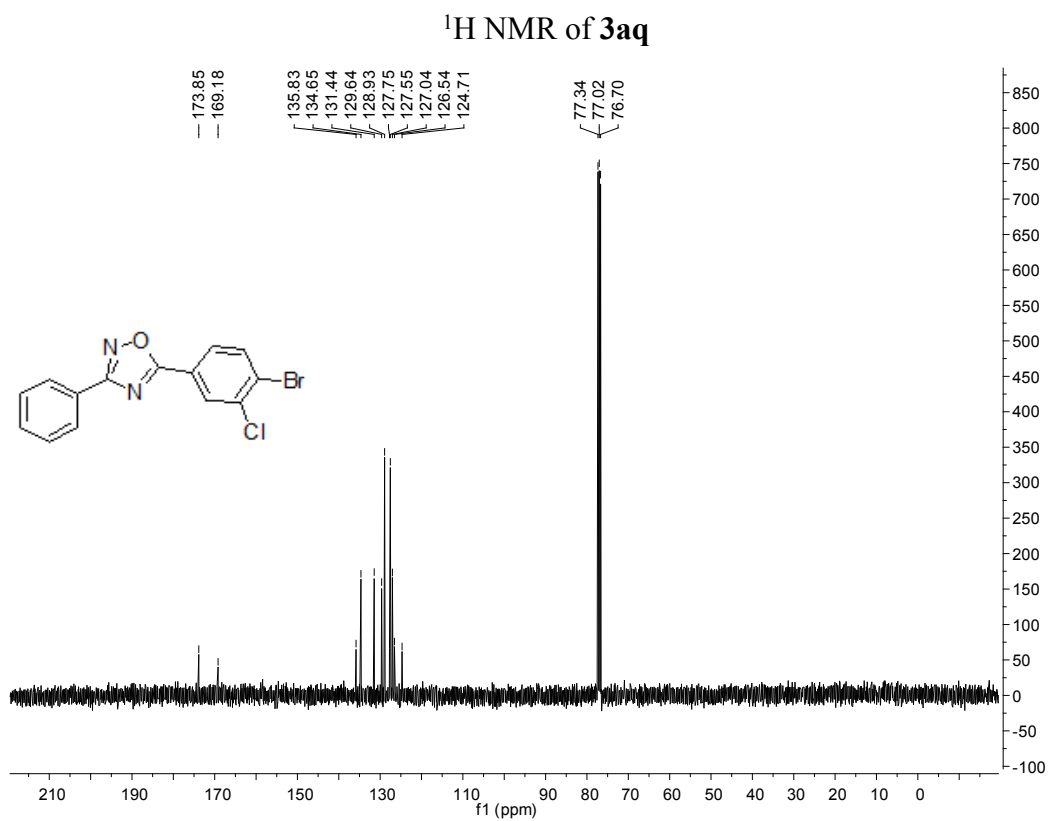

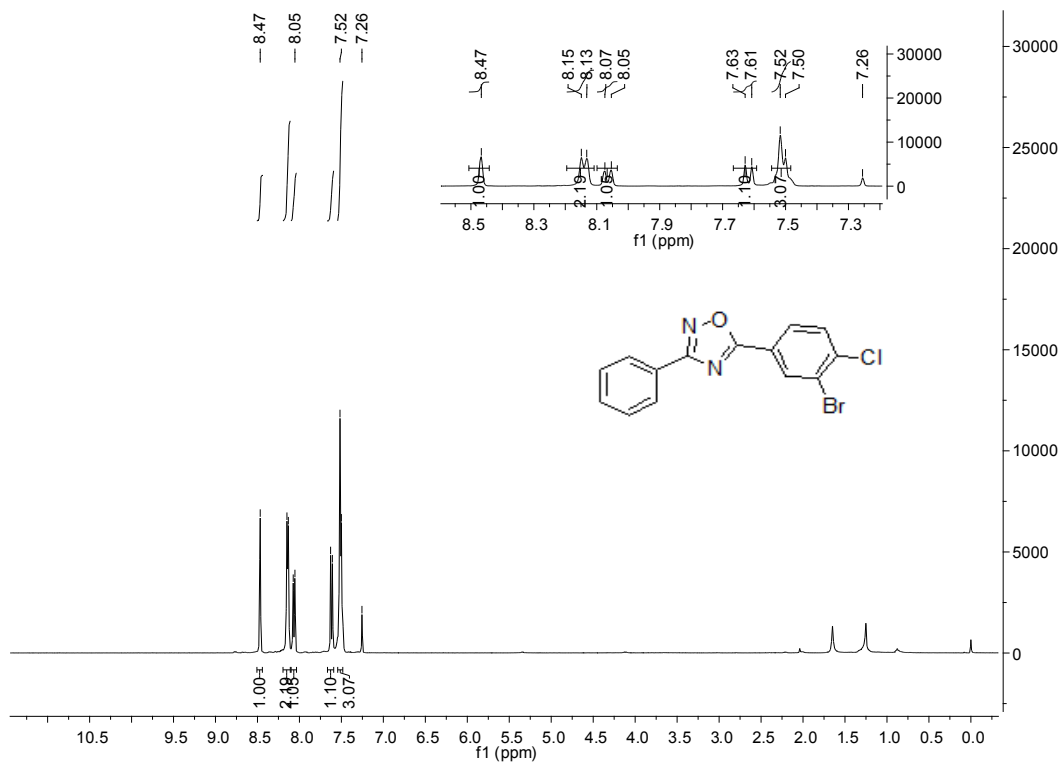

<sup>1</sup>H NMR of **3ar**

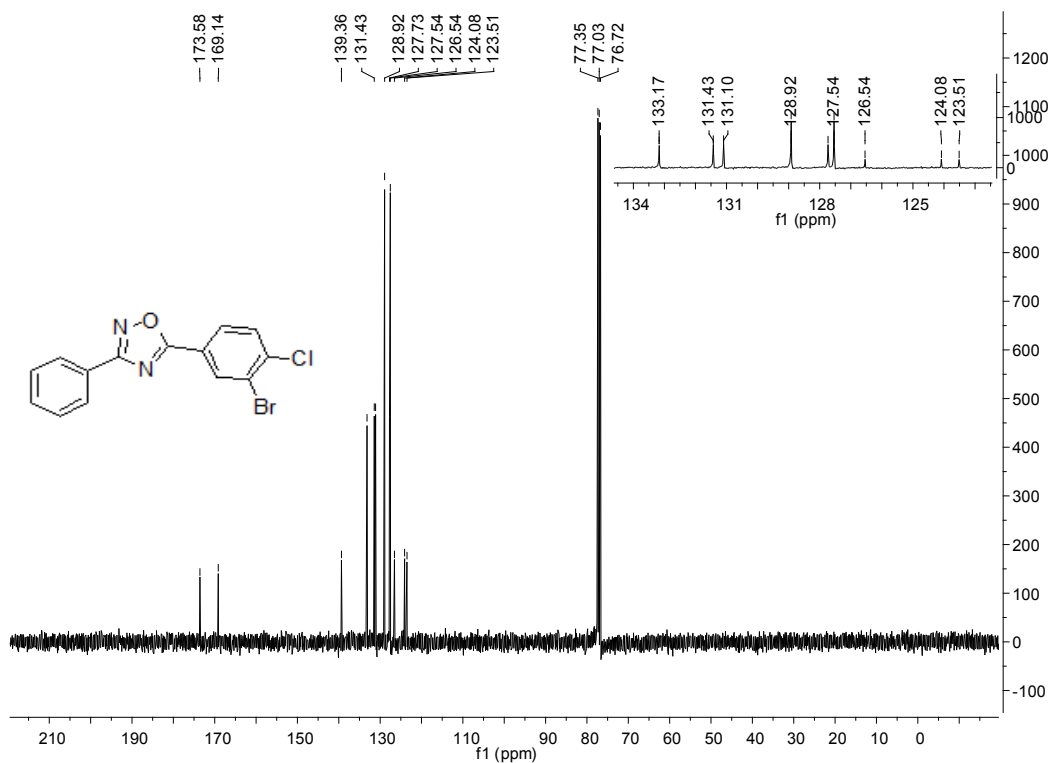

<sup>13</sup>C NMR of **3ar**

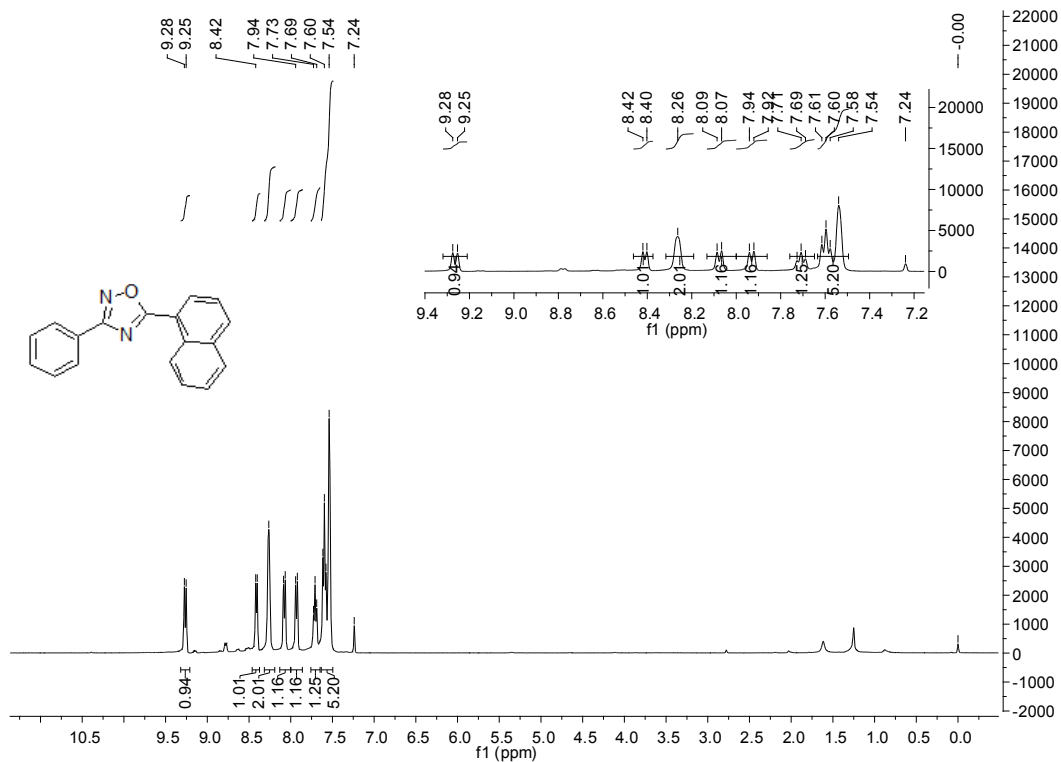

**<sup>1</sup>H NMR of 3as**

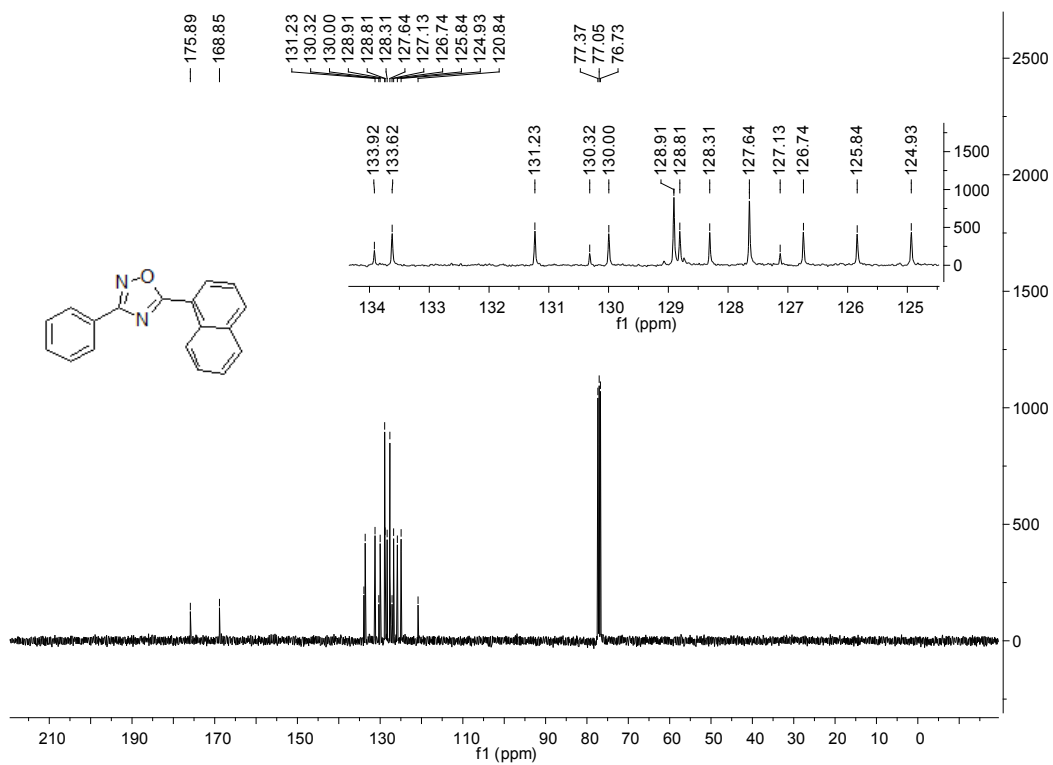

**<sup>13</sup>C NMR of 3as**

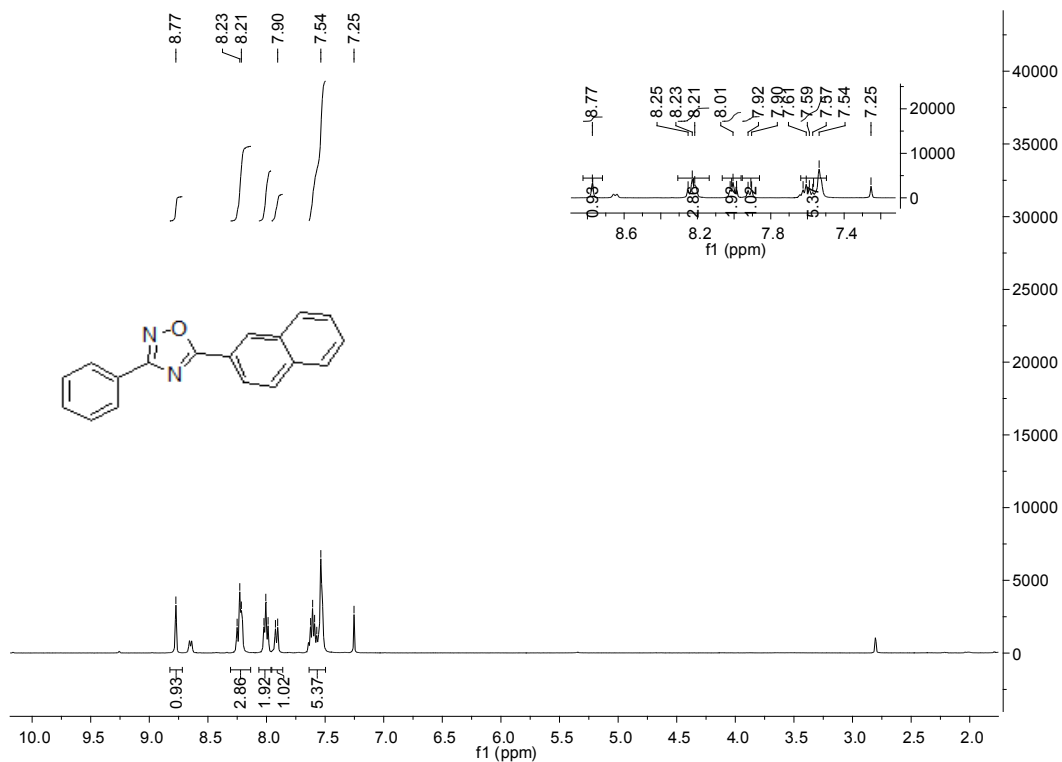

<sup>1</sup>H NMR of 3at

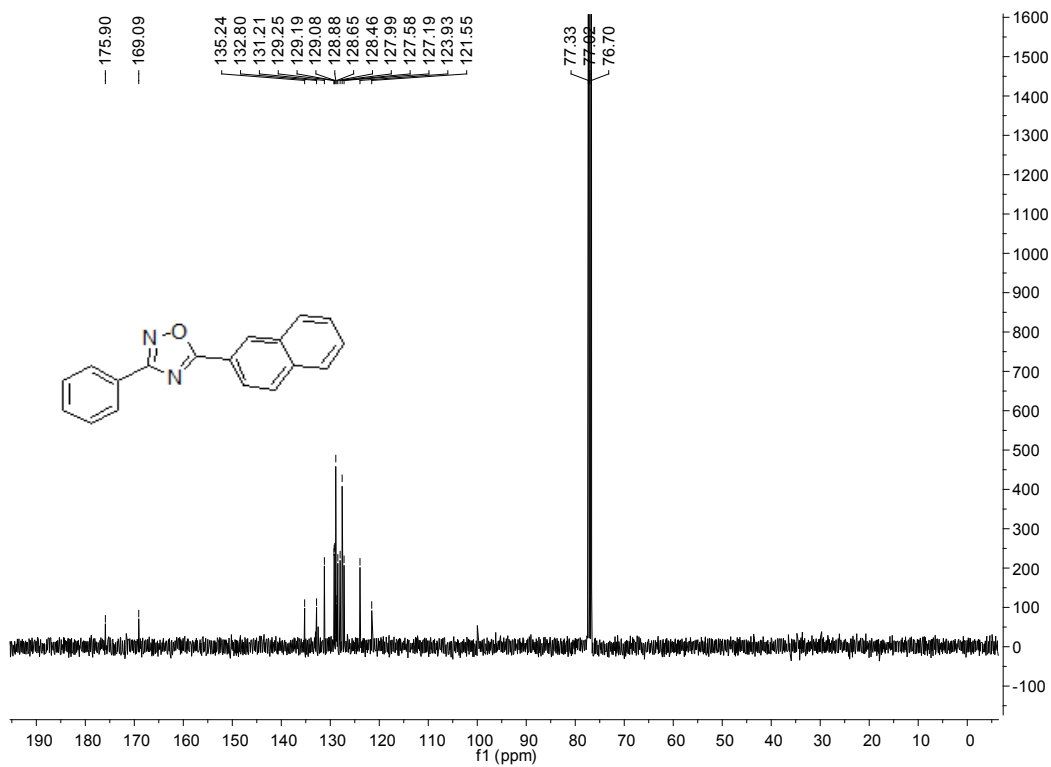

<sup>13</sup>C NMR of 3at

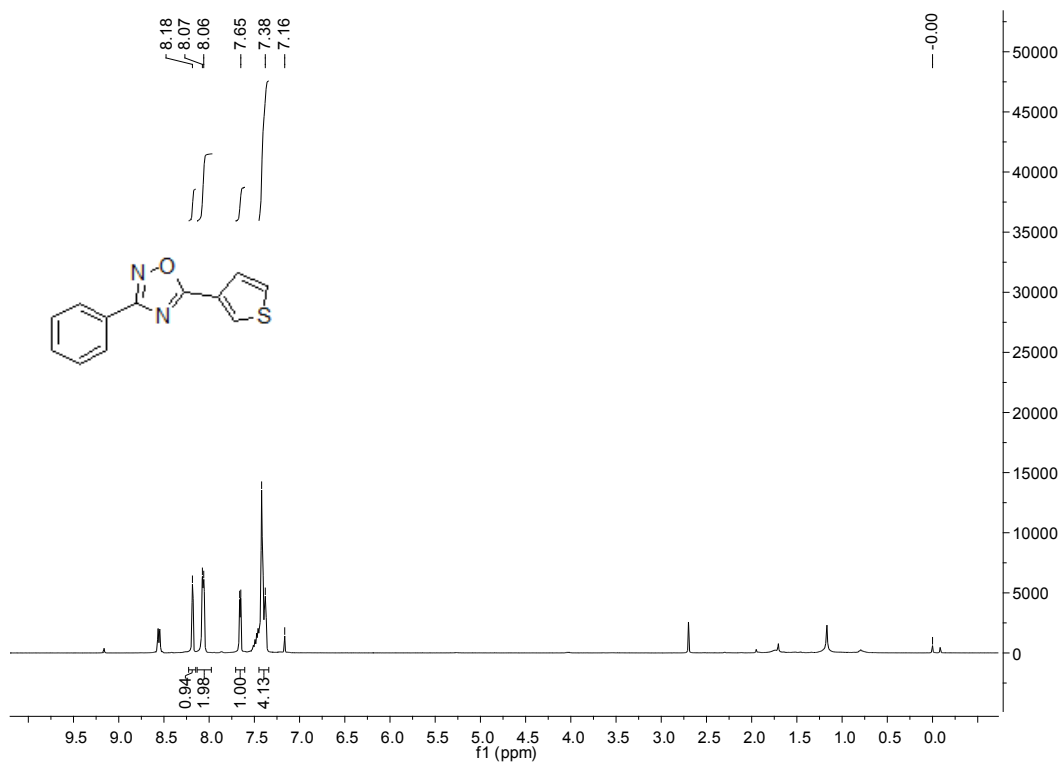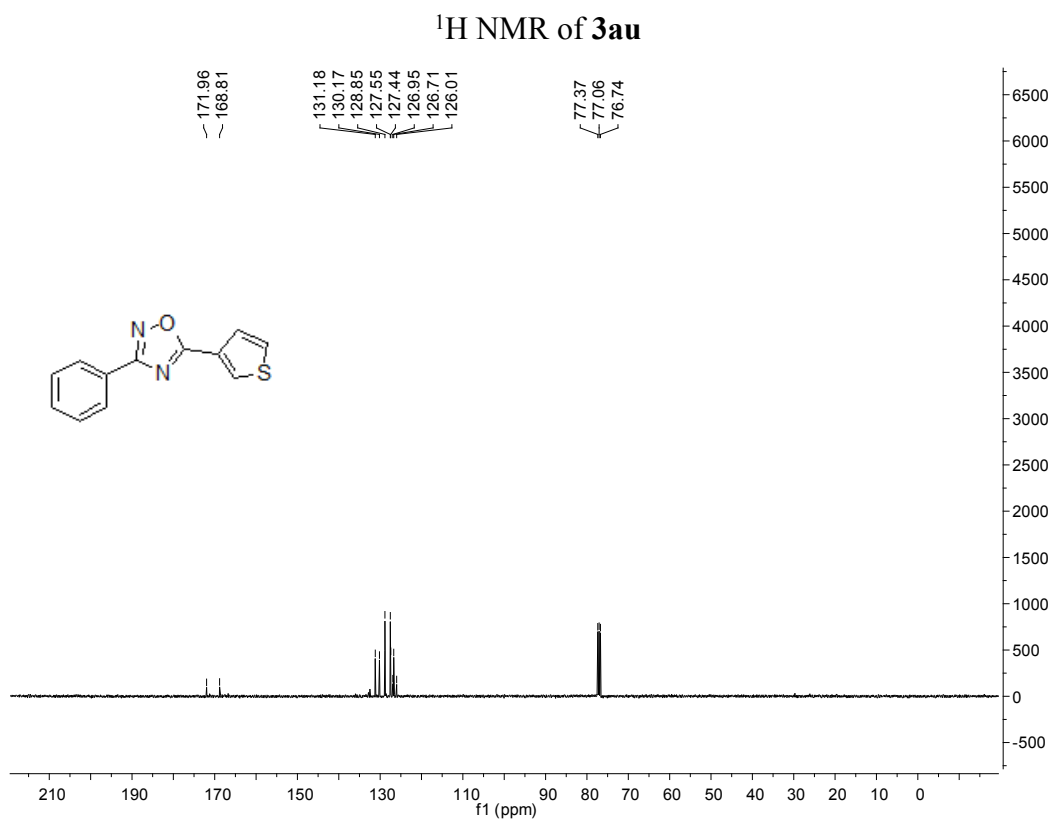

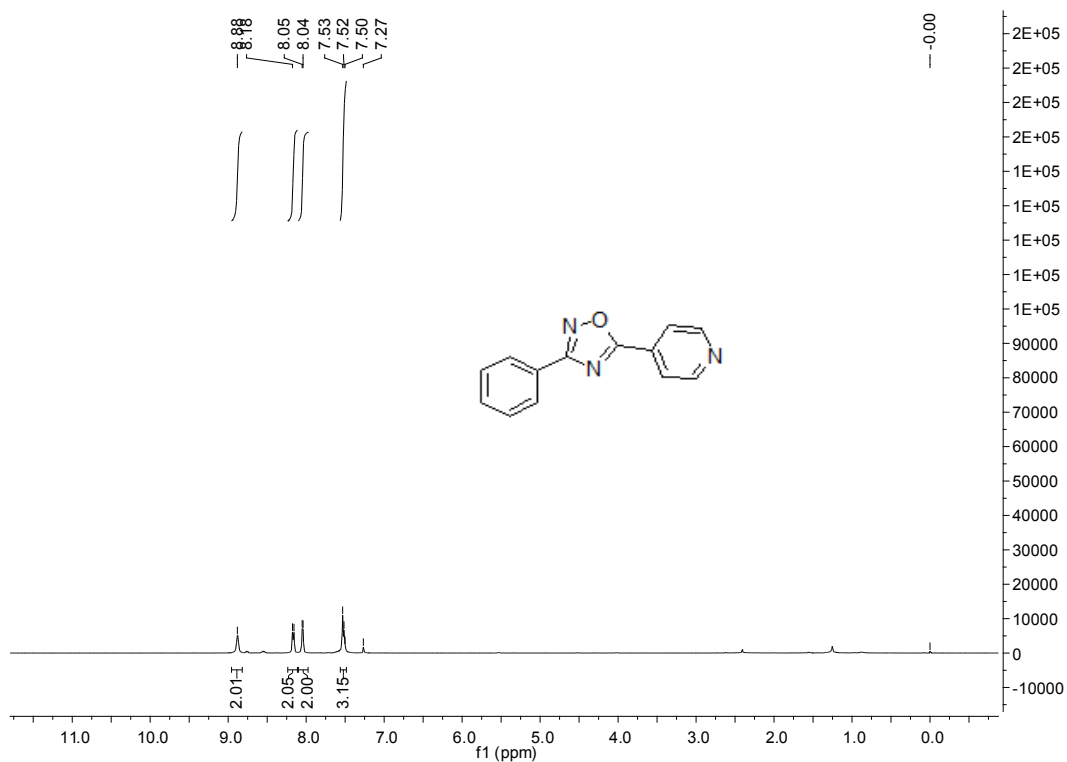

**<sup>1</sup>H NMR of 3av**

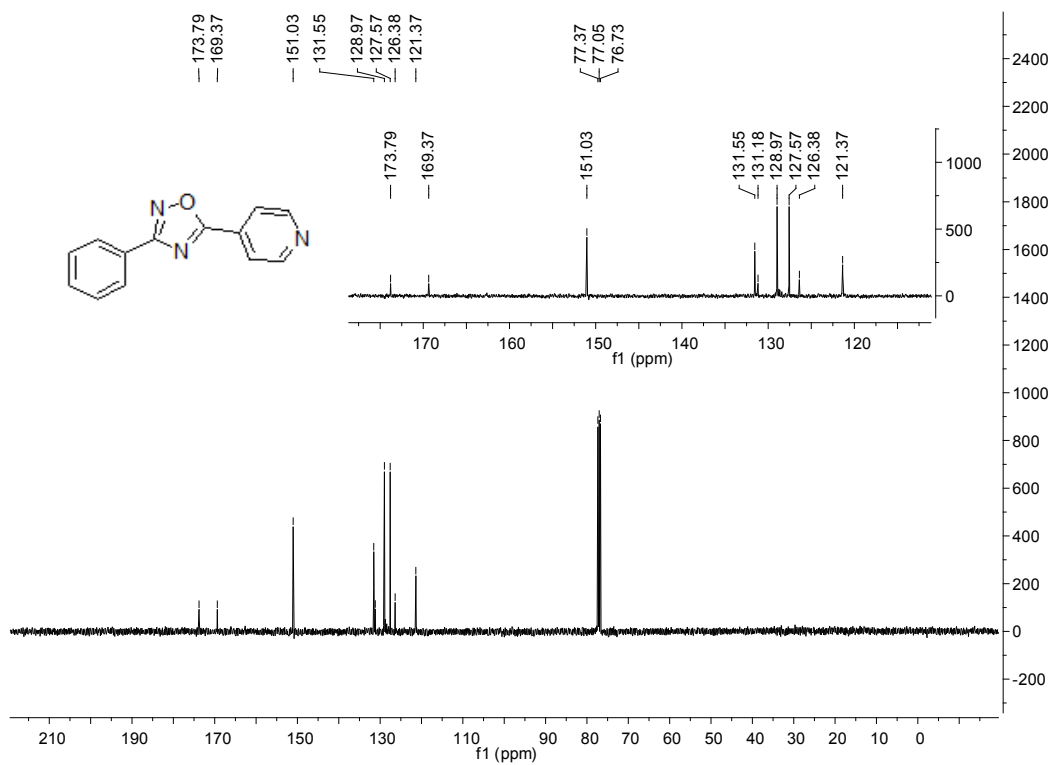

**<sup>13</sup>C NMR of 3av**

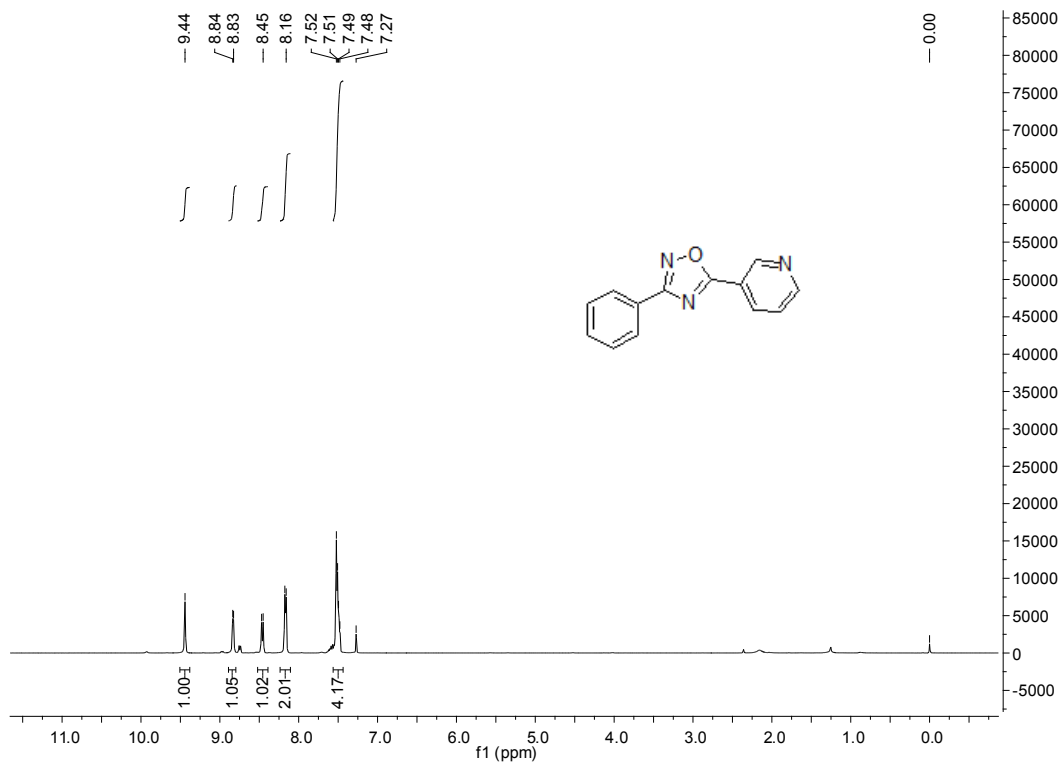

<sup>1</sup>H NMR of 3aw

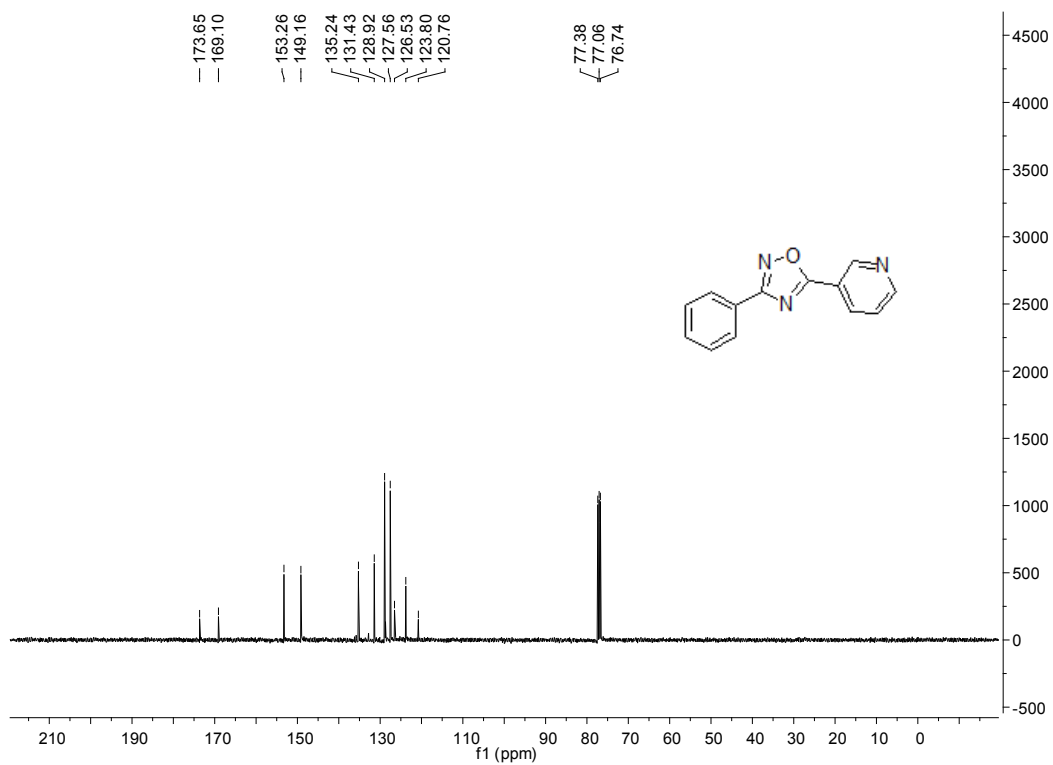

<sup>13</sup>C NMR of 3aw

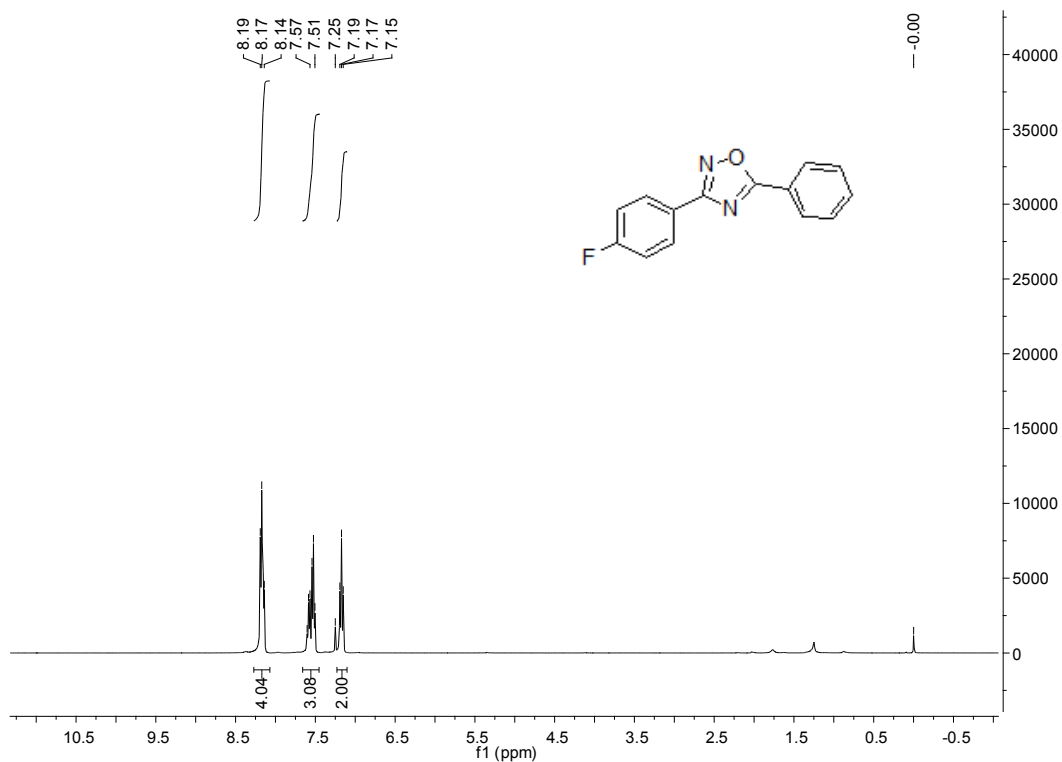

<sup>1</sup>H NMR of **3ba**

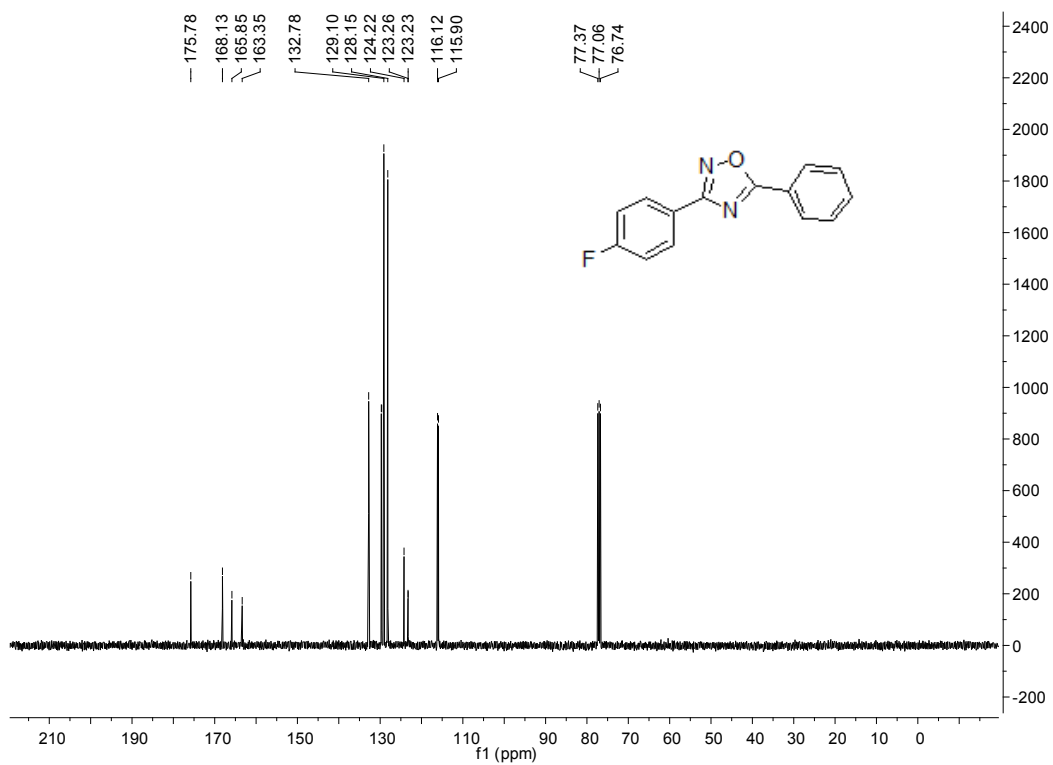

<sup>13</sup>C NMR of **3ba**



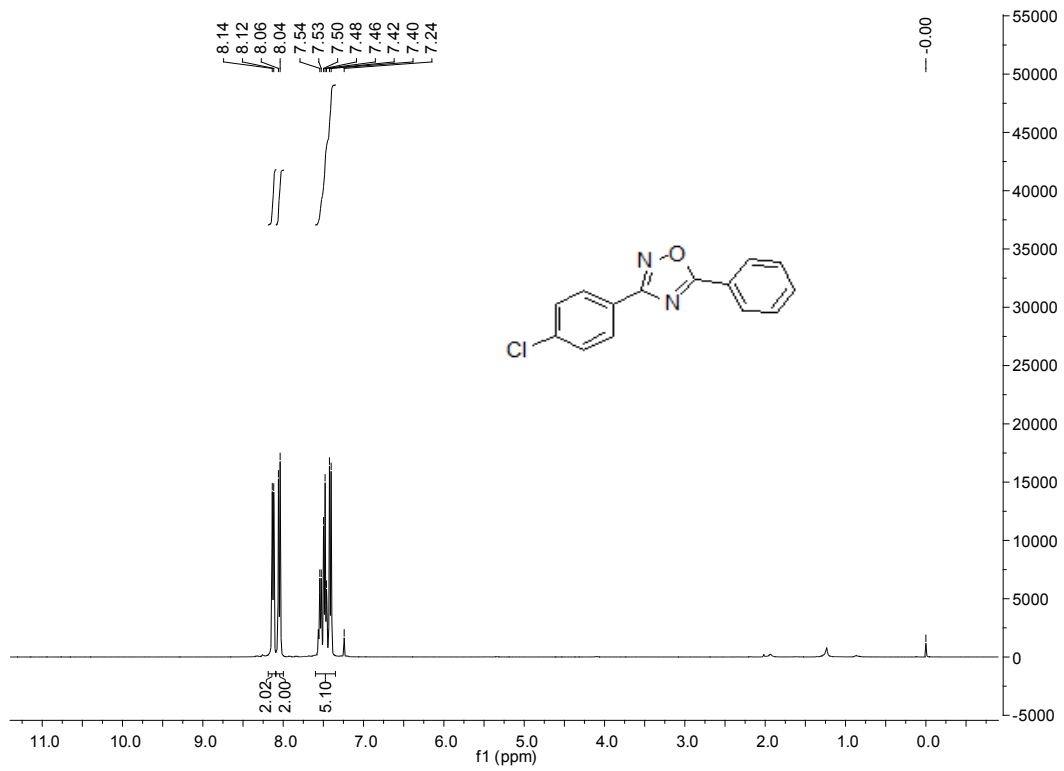

<sup>1</sup>H NMR of 3ca

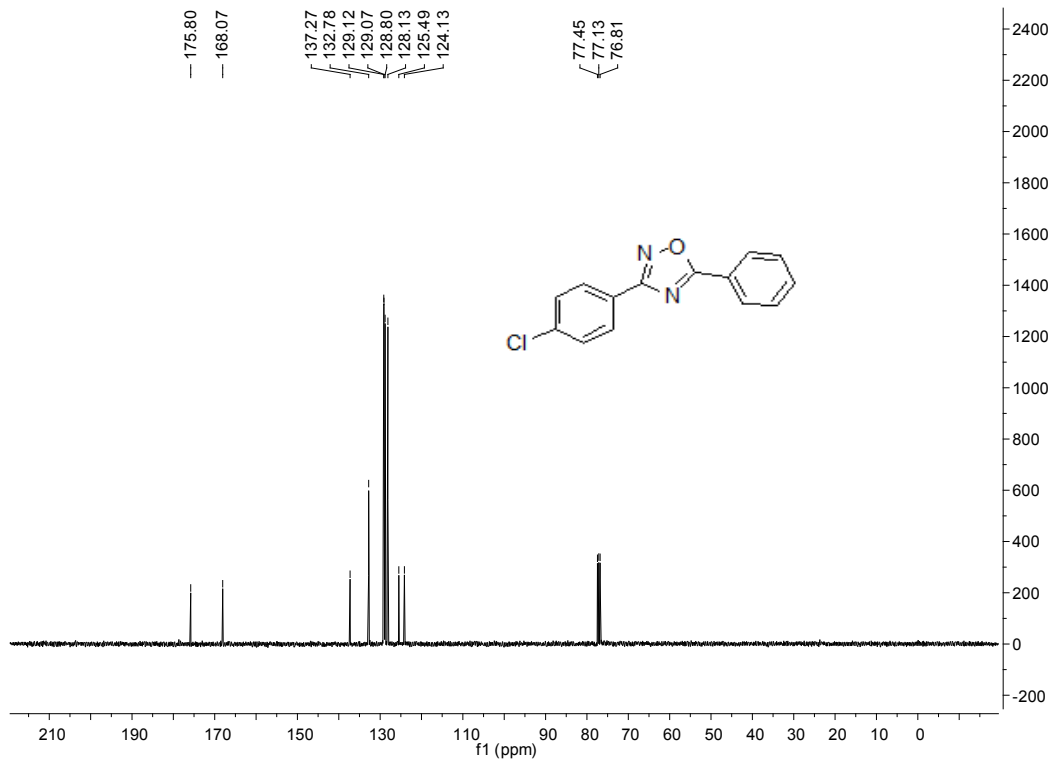

<sup>13</sup>C NMR of 3ca

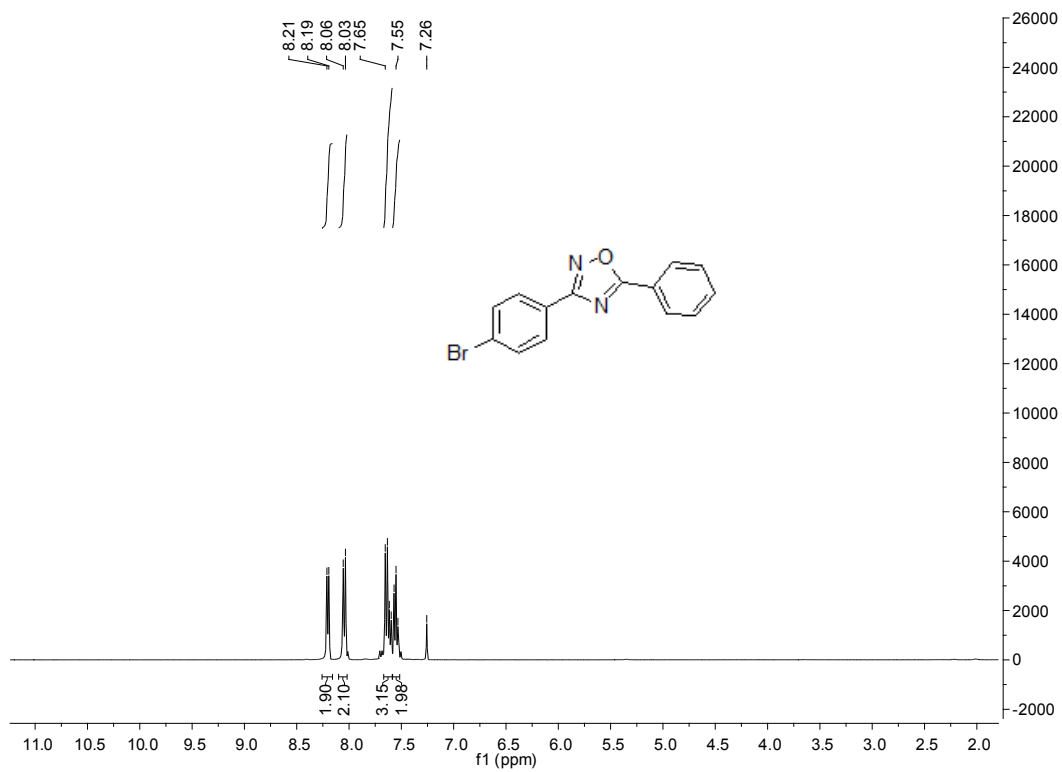

<sup>1</sup>H NMR of 3da

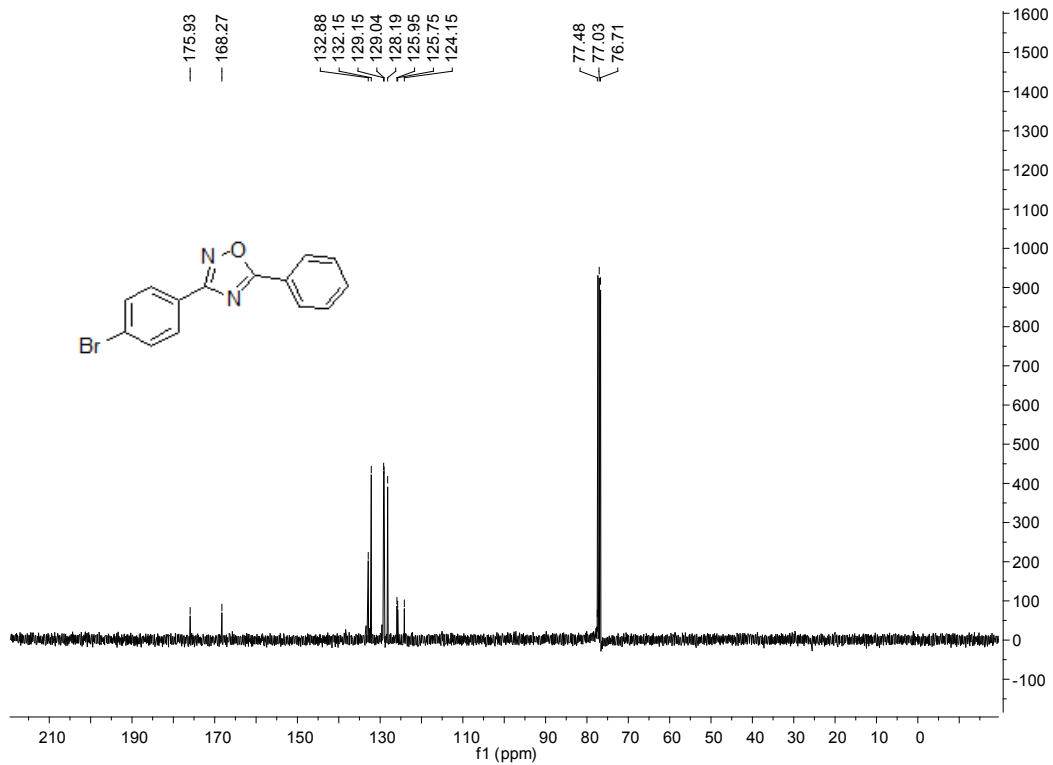

<sup>13</sup>C NMR of 3da

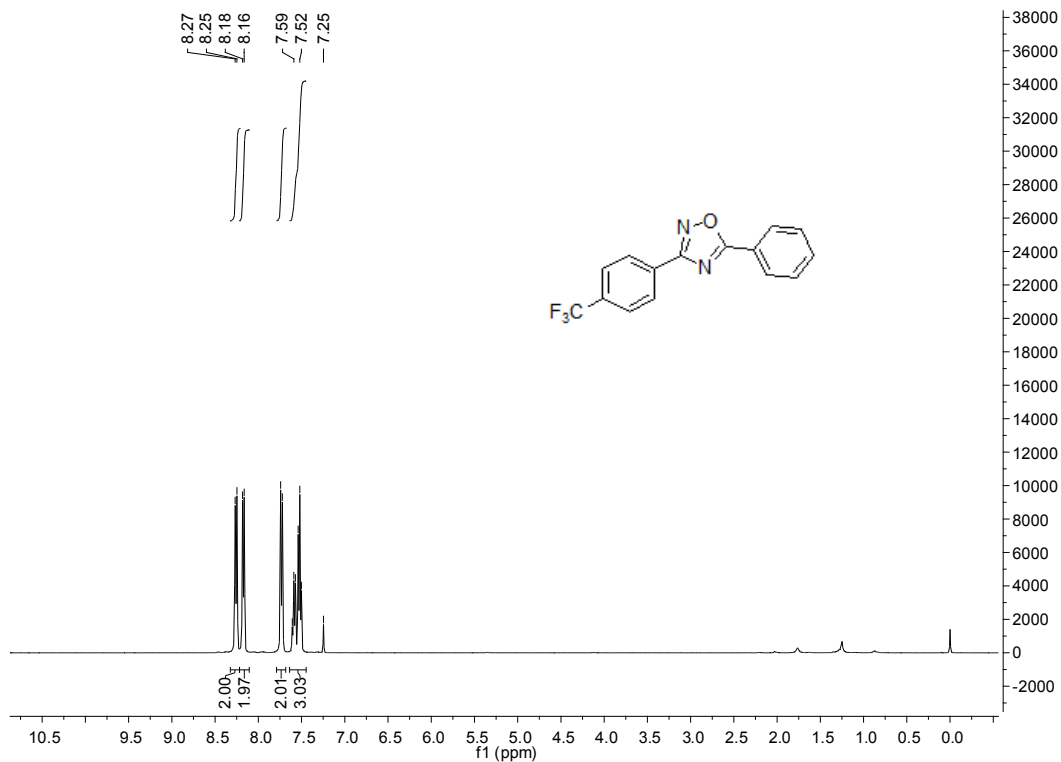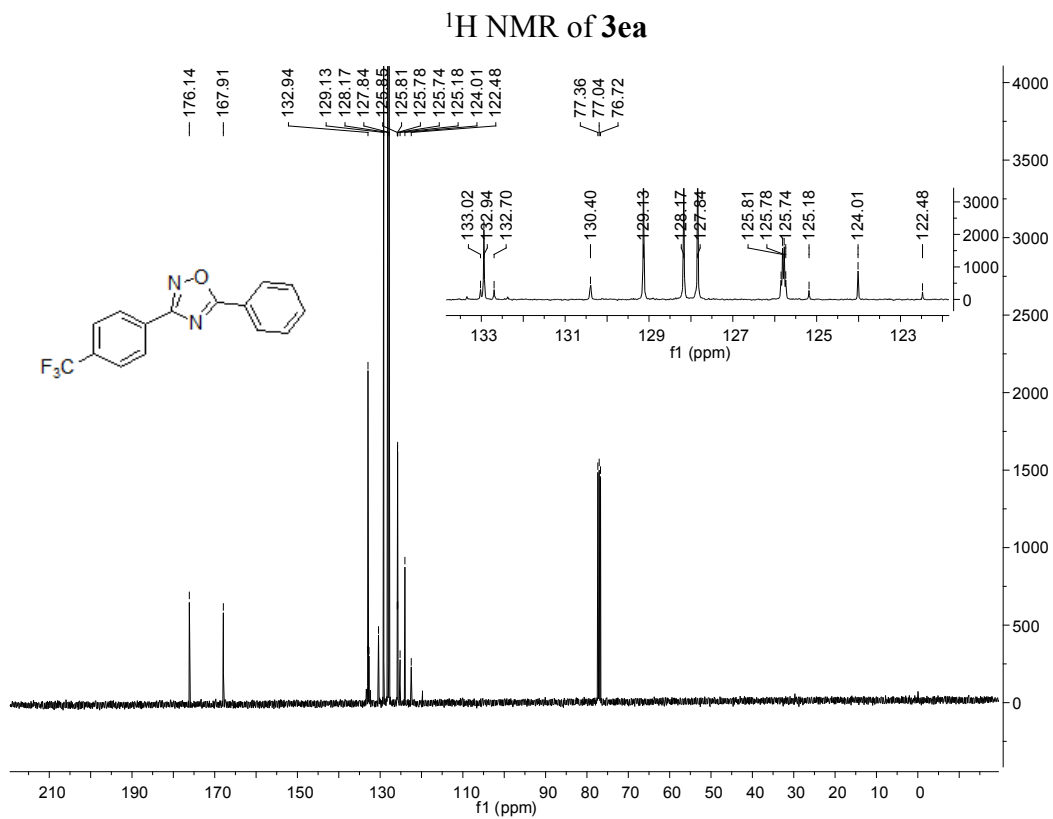

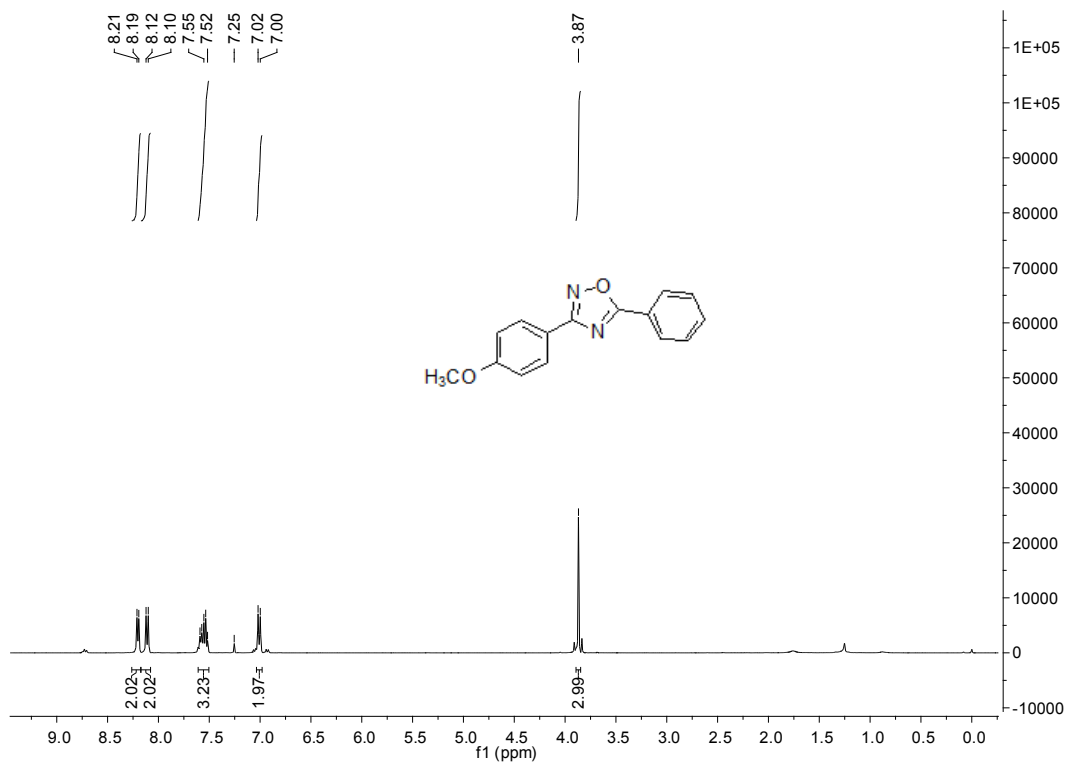

<sup>1</sup>H NMR of **3fa**

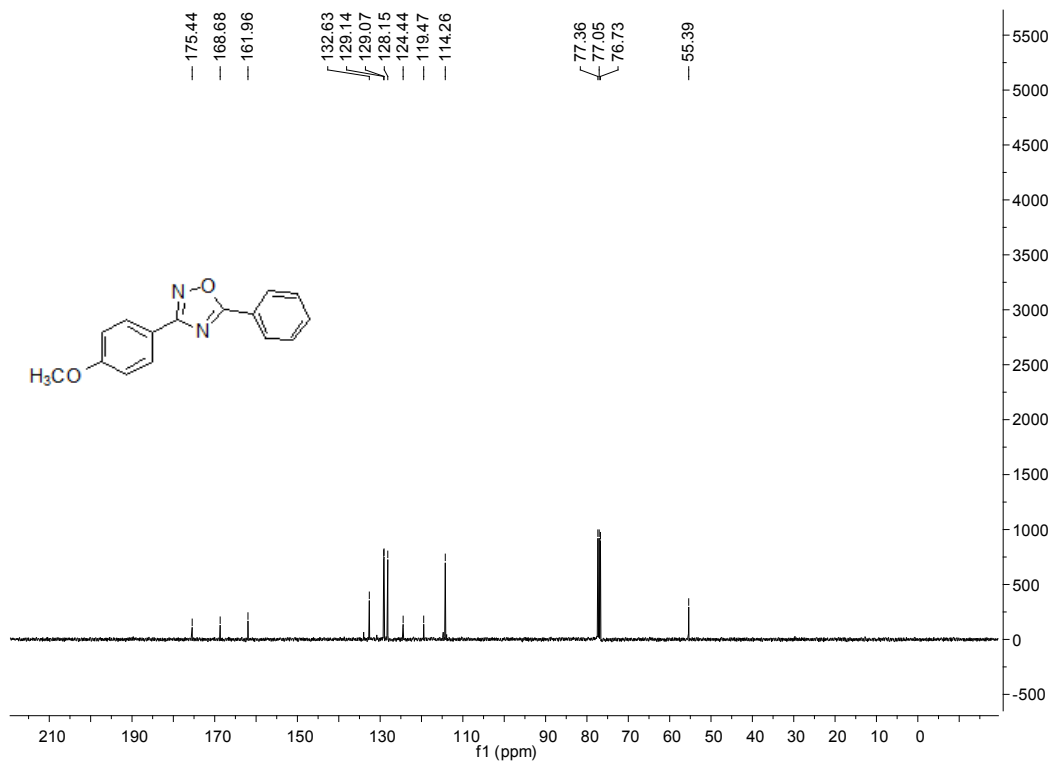

<sup>13</sup>C NMR of **3fa**

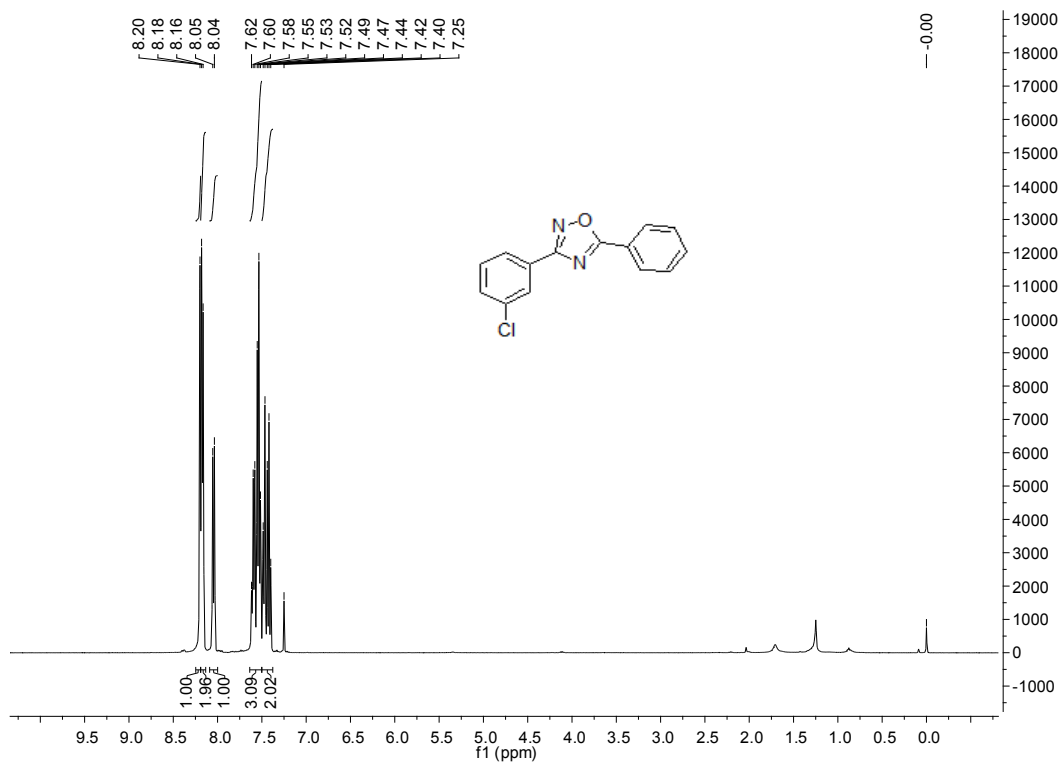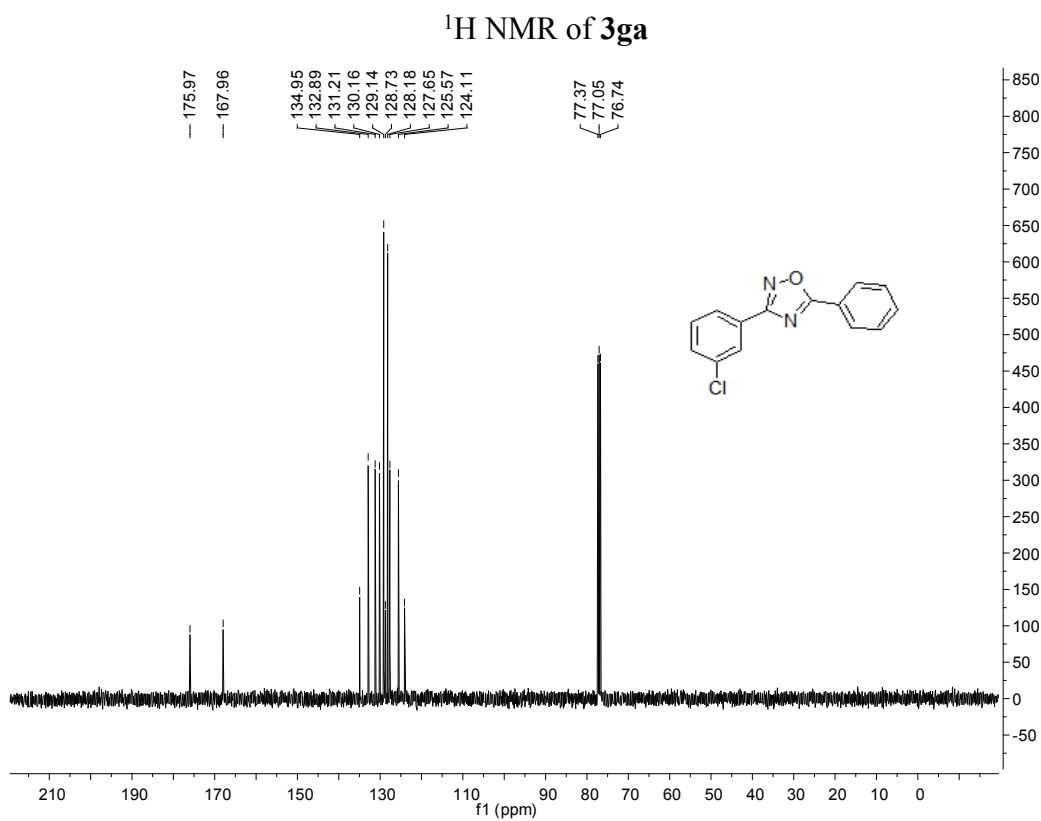

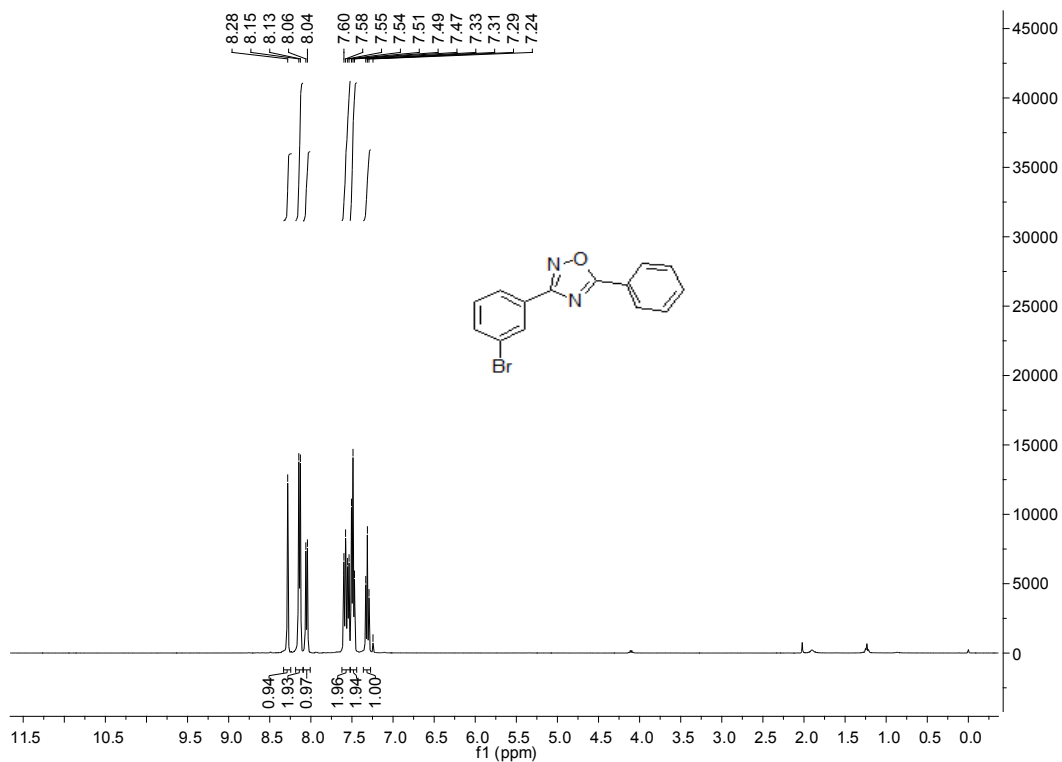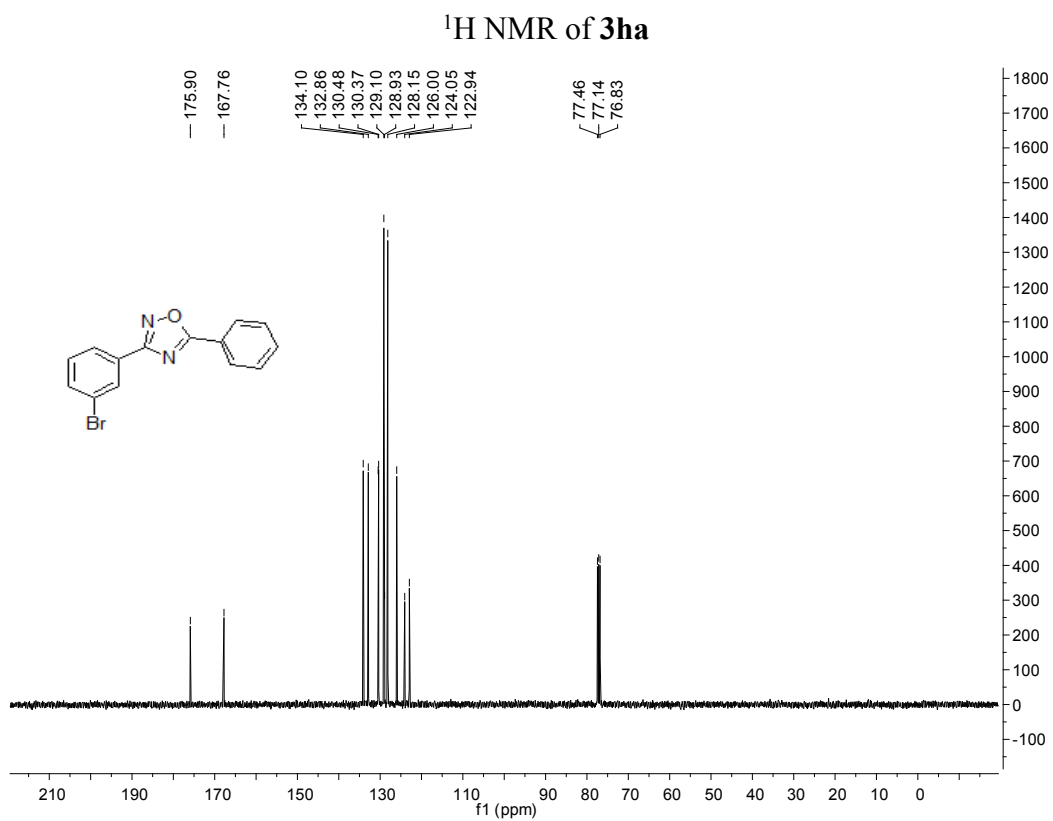

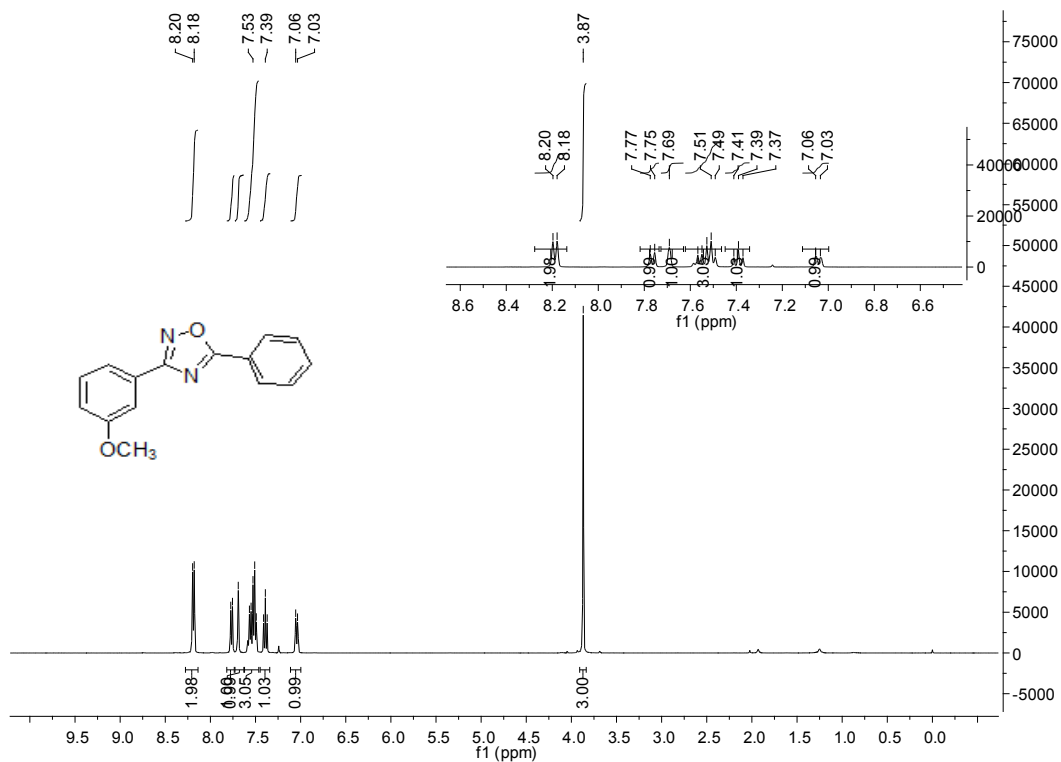

**<sup>1</sup>H NMR of 3ia**

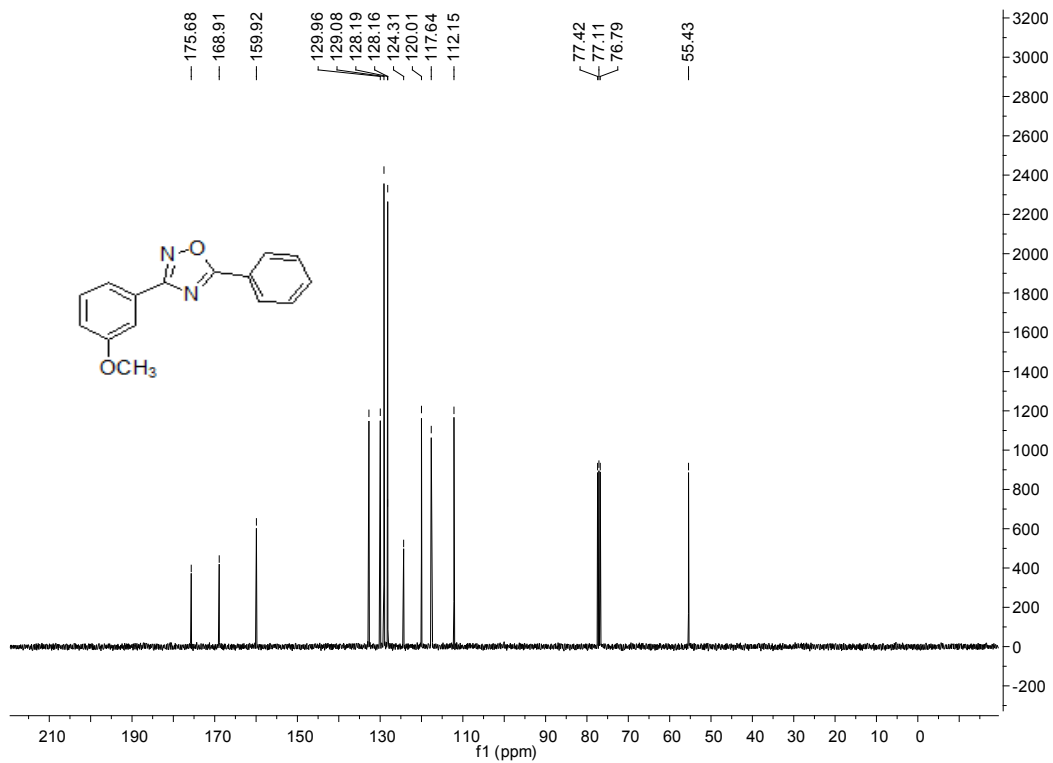

**<sup>13</sup>C NMR of 3ia**

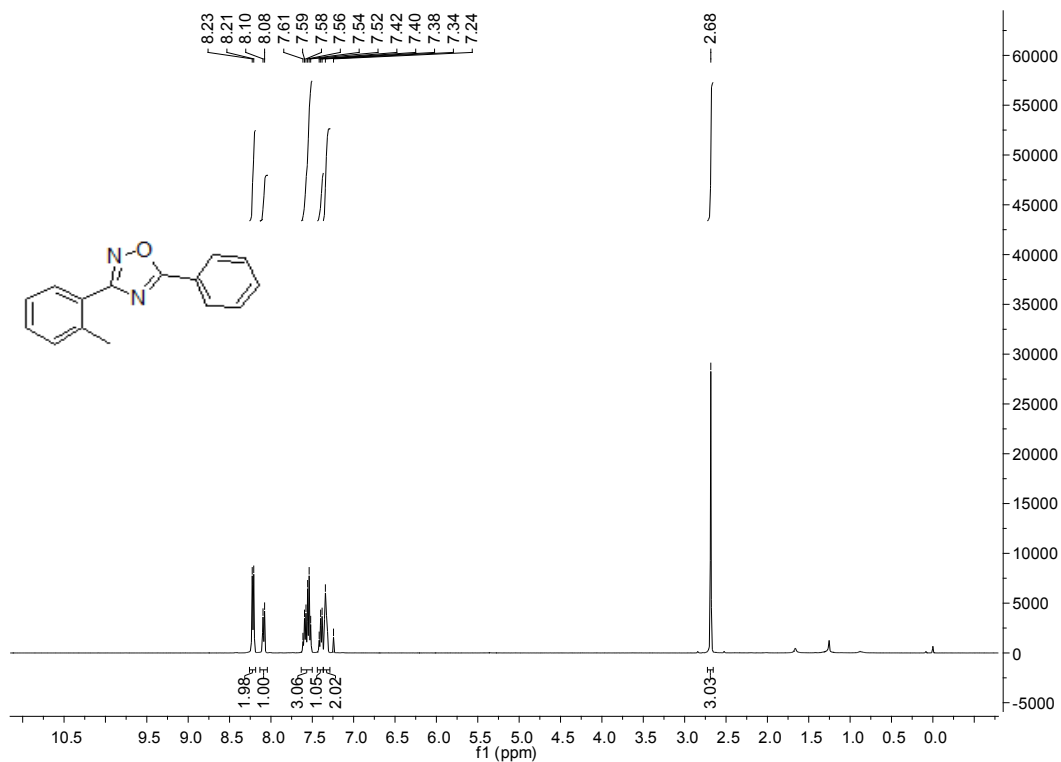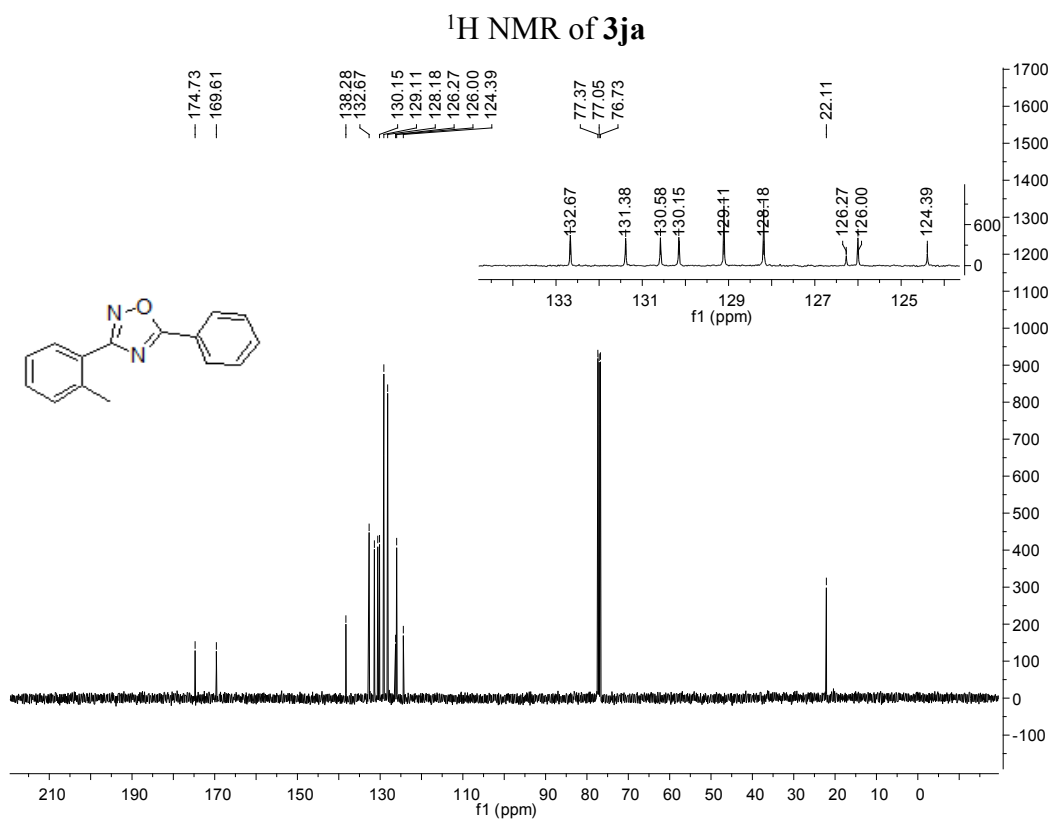



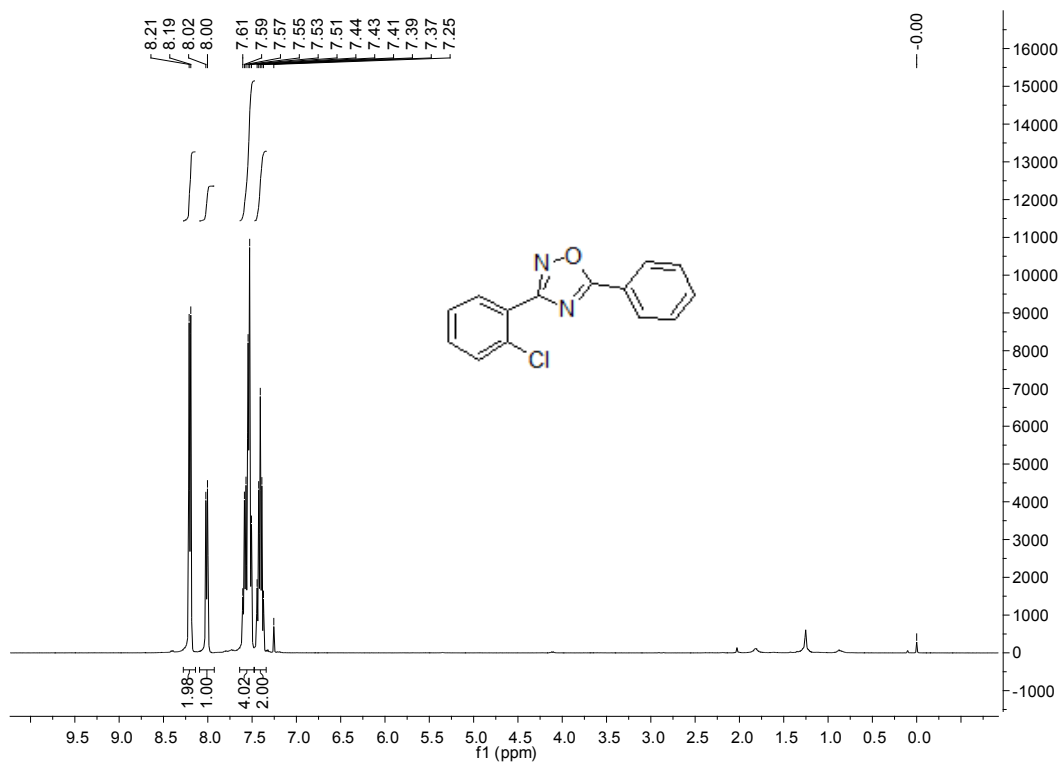

<sup>1</sup>H NMR of 3ka

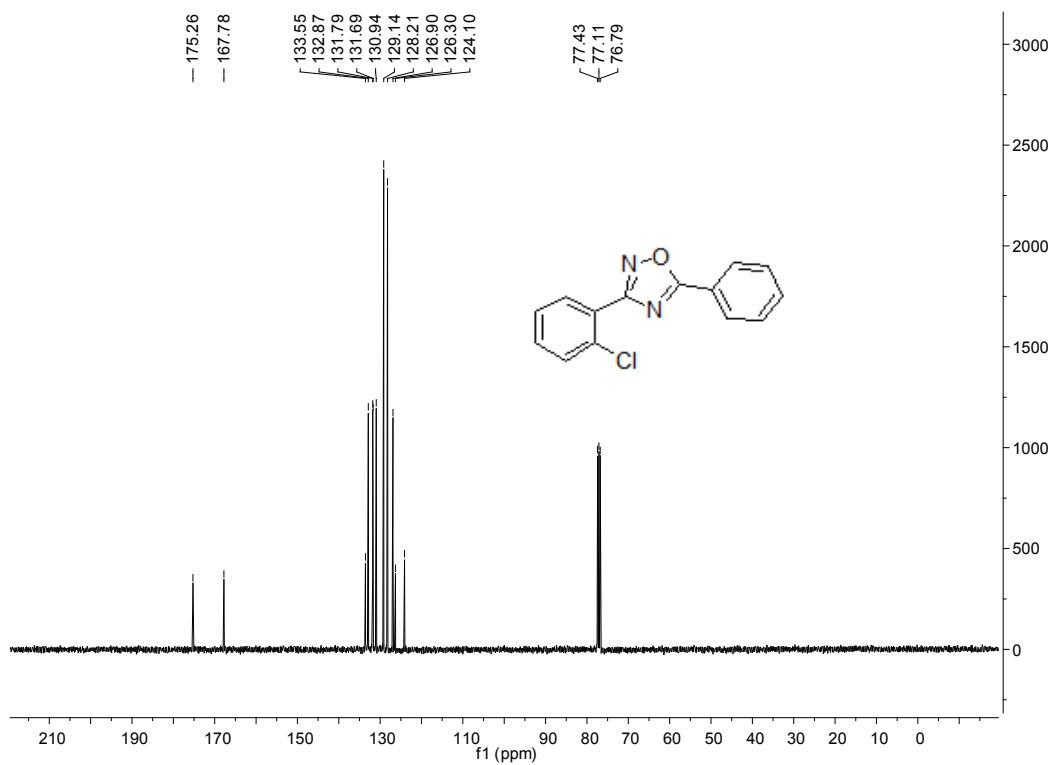

<sup>13</sup>C NMR of 3ka

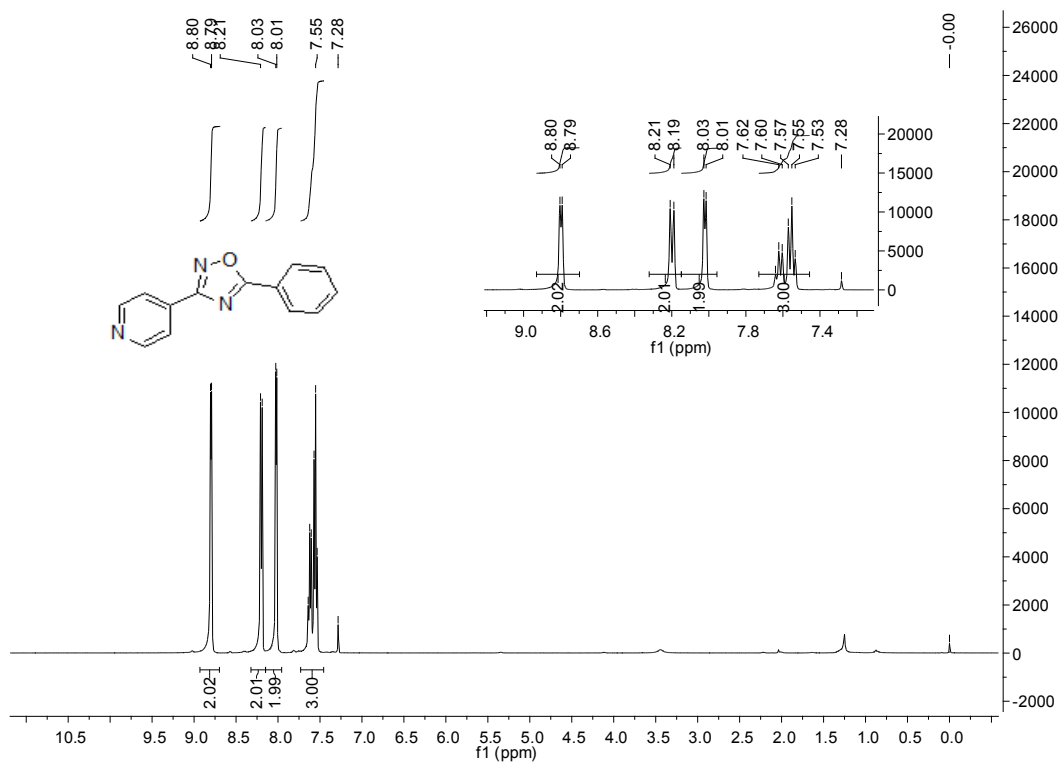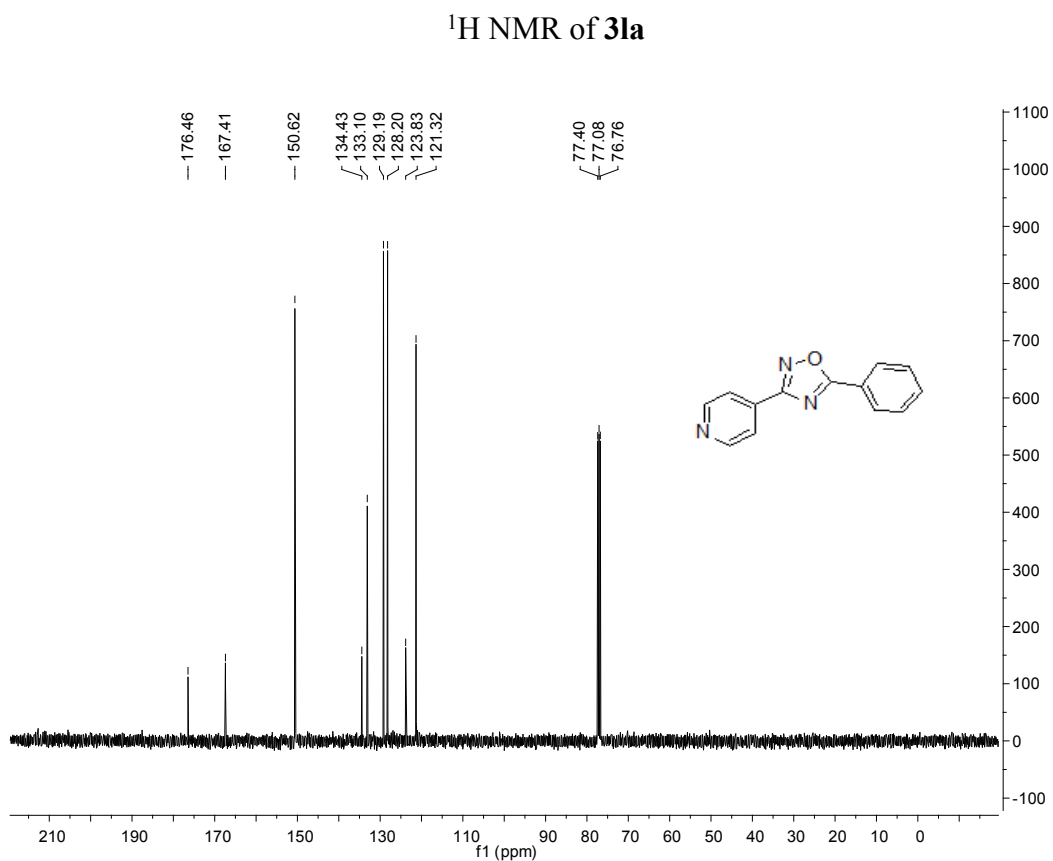

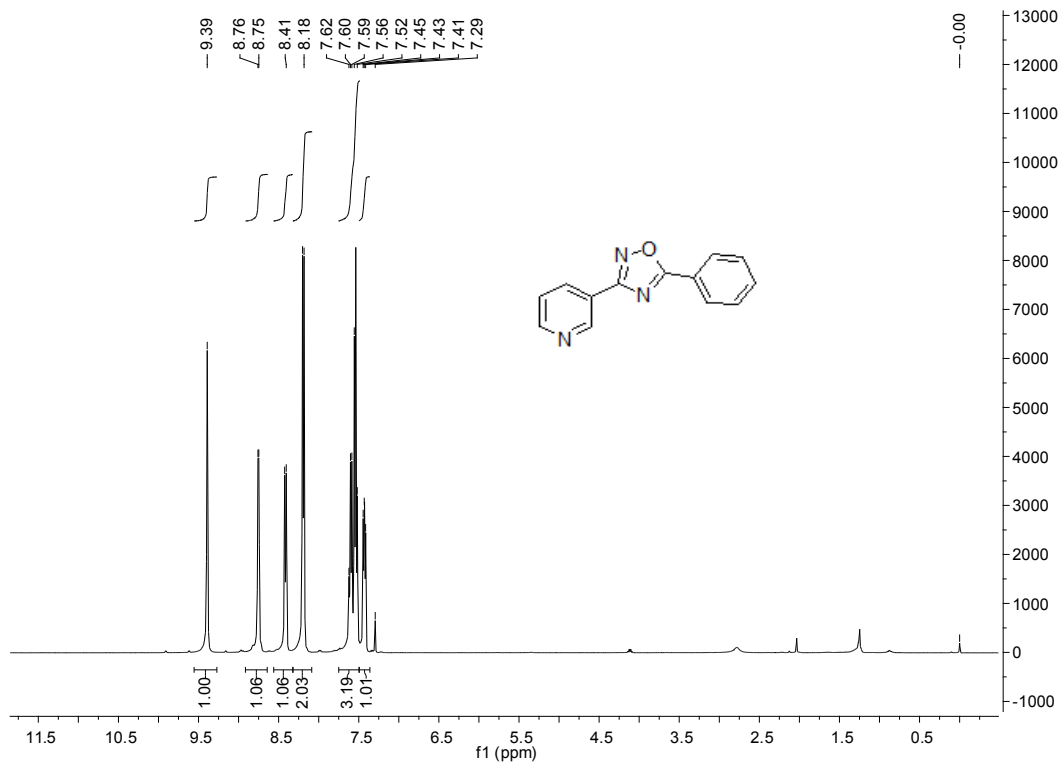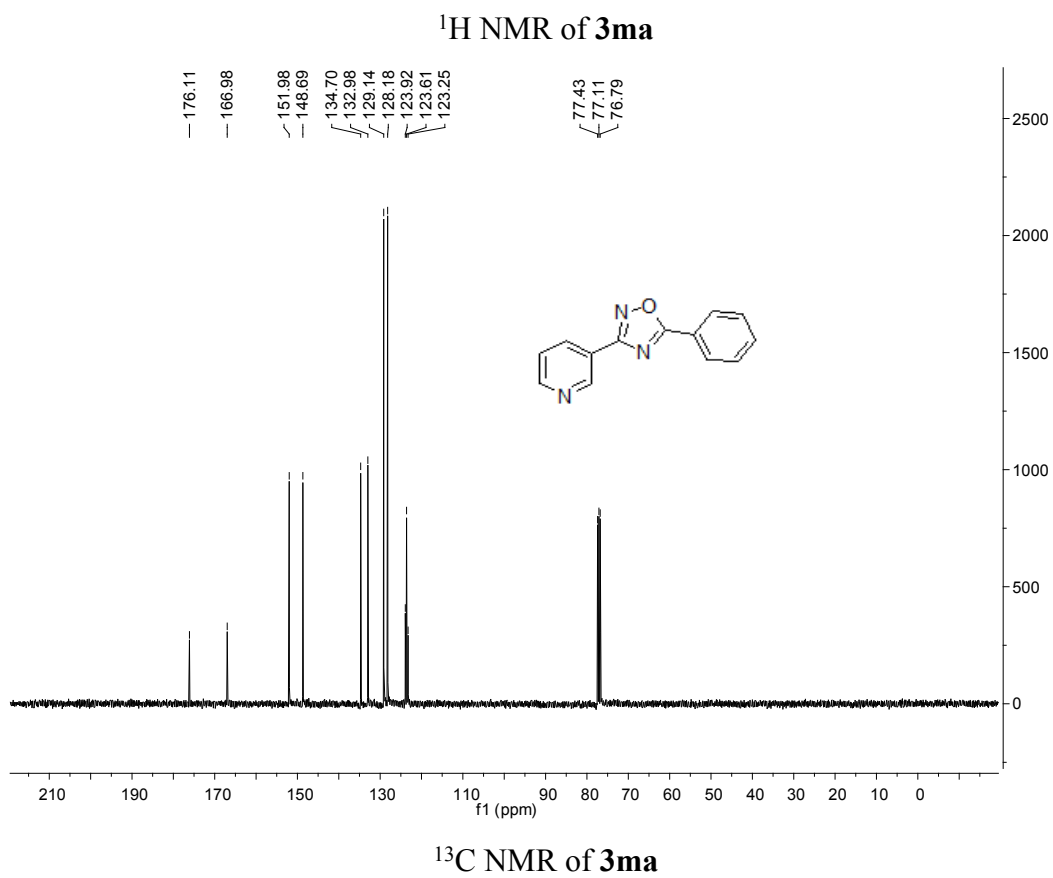

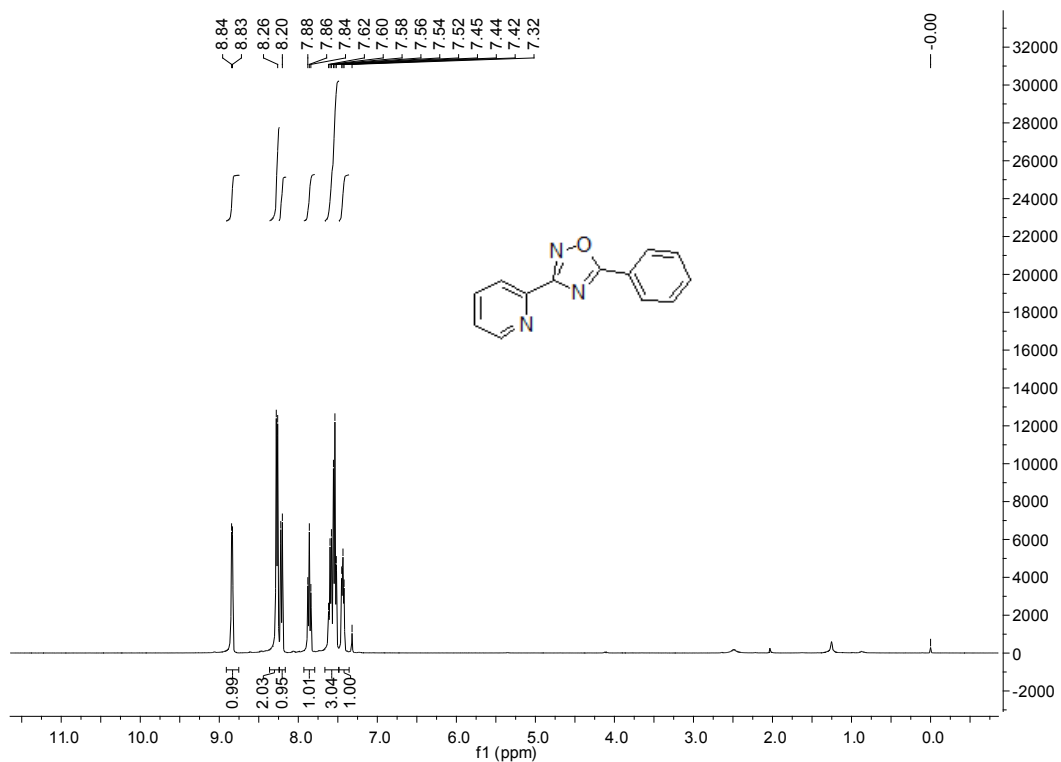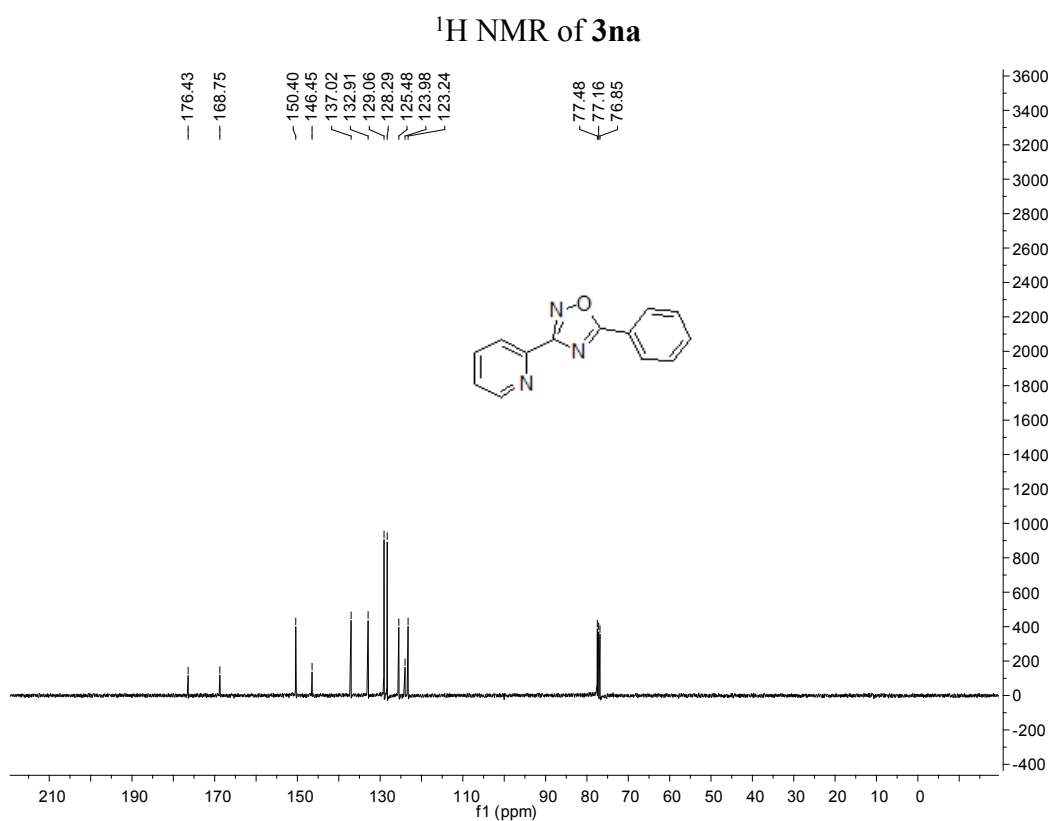

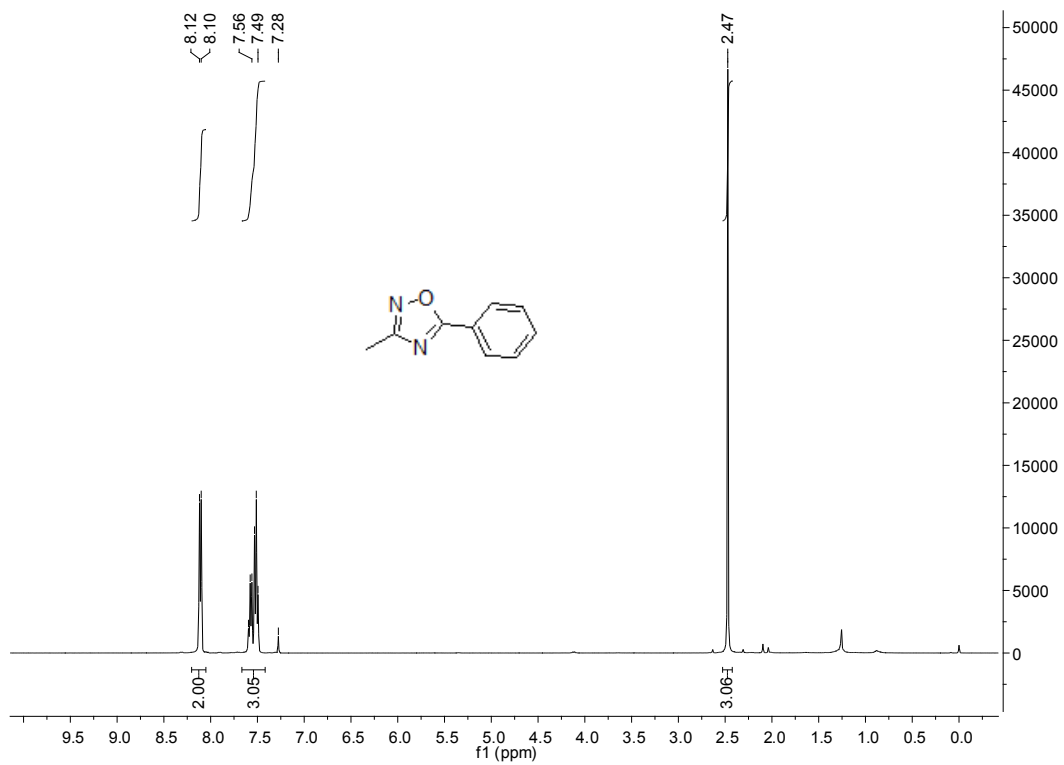

<sup>1</sup>H NMR of 30a

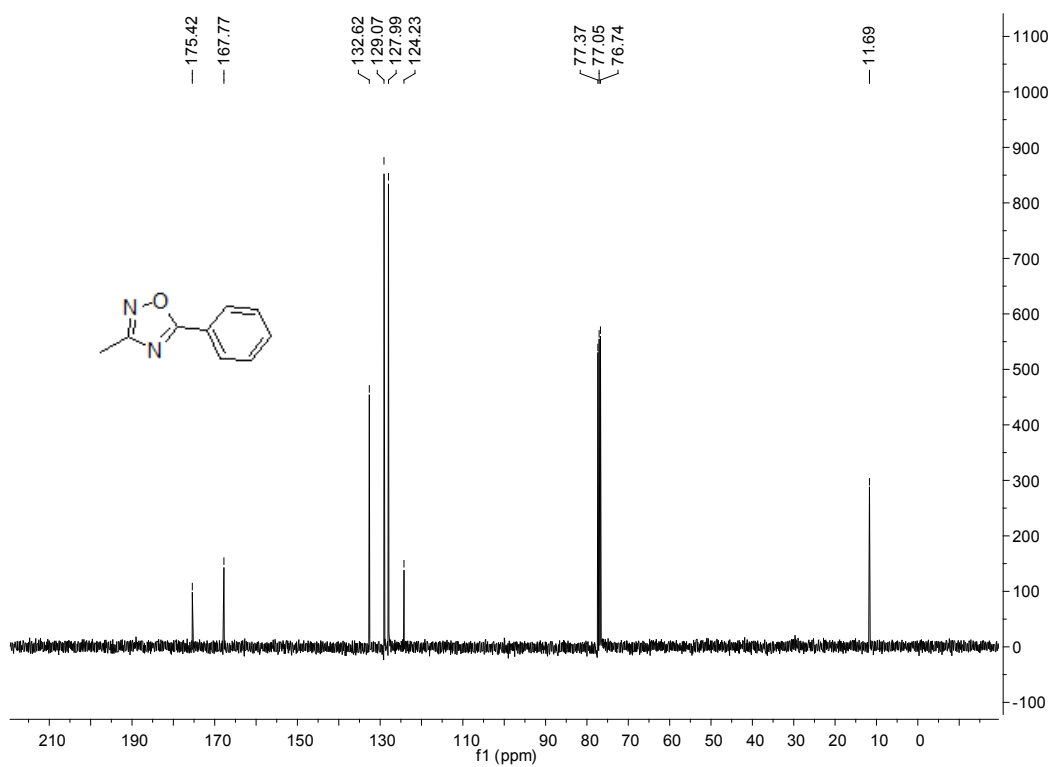

<sup>13</sup>C NMR of 30a

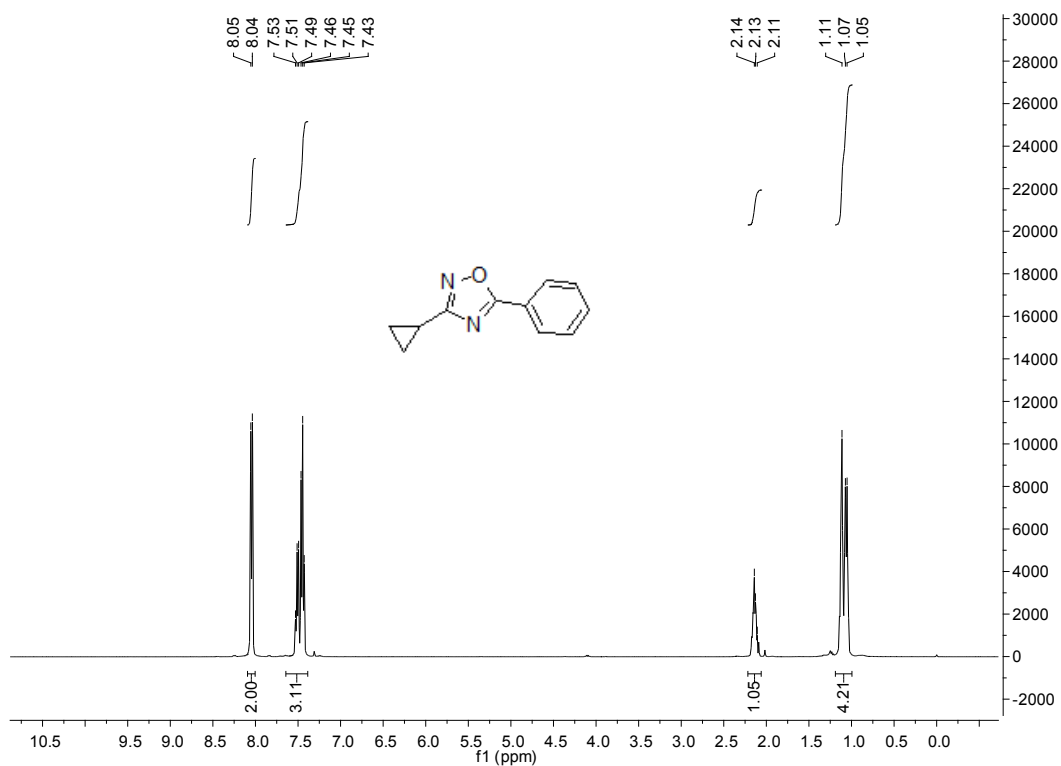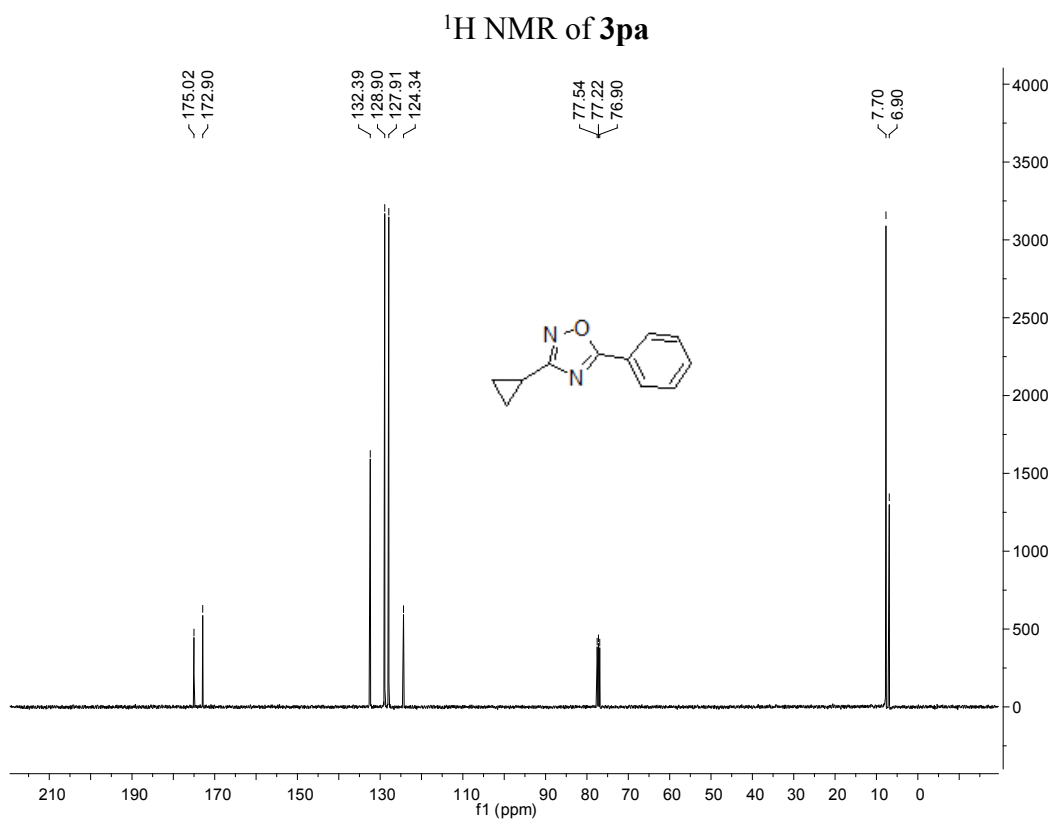

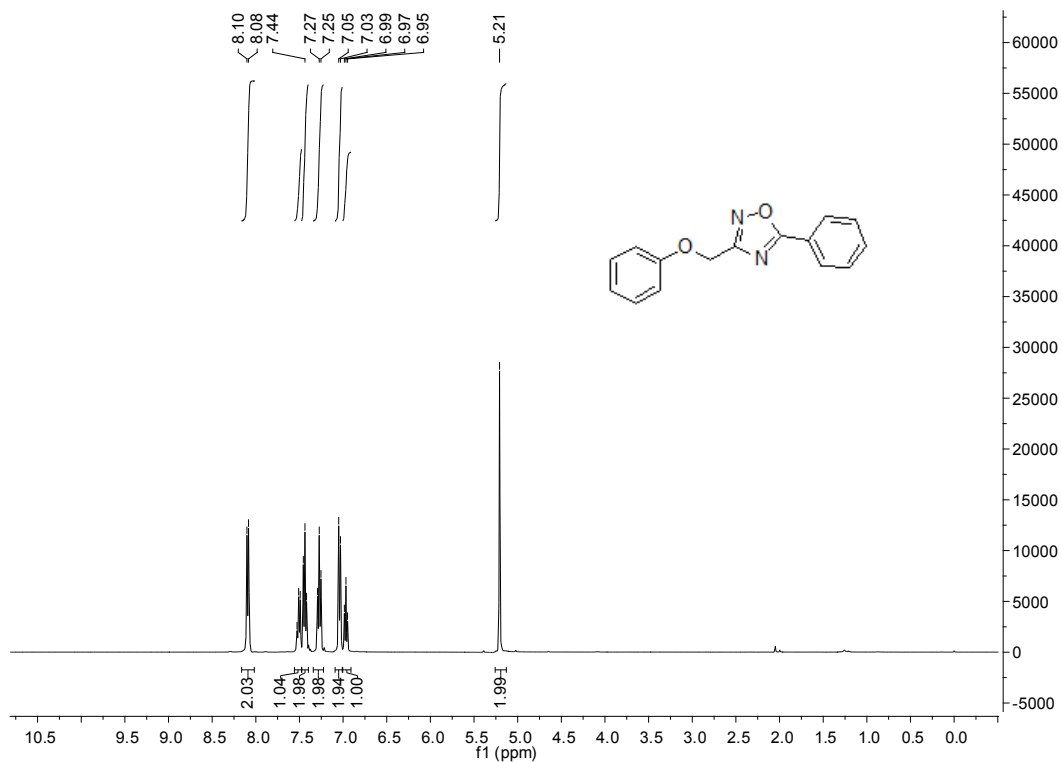

**<sup>1</sup>H NMR of 3qa**

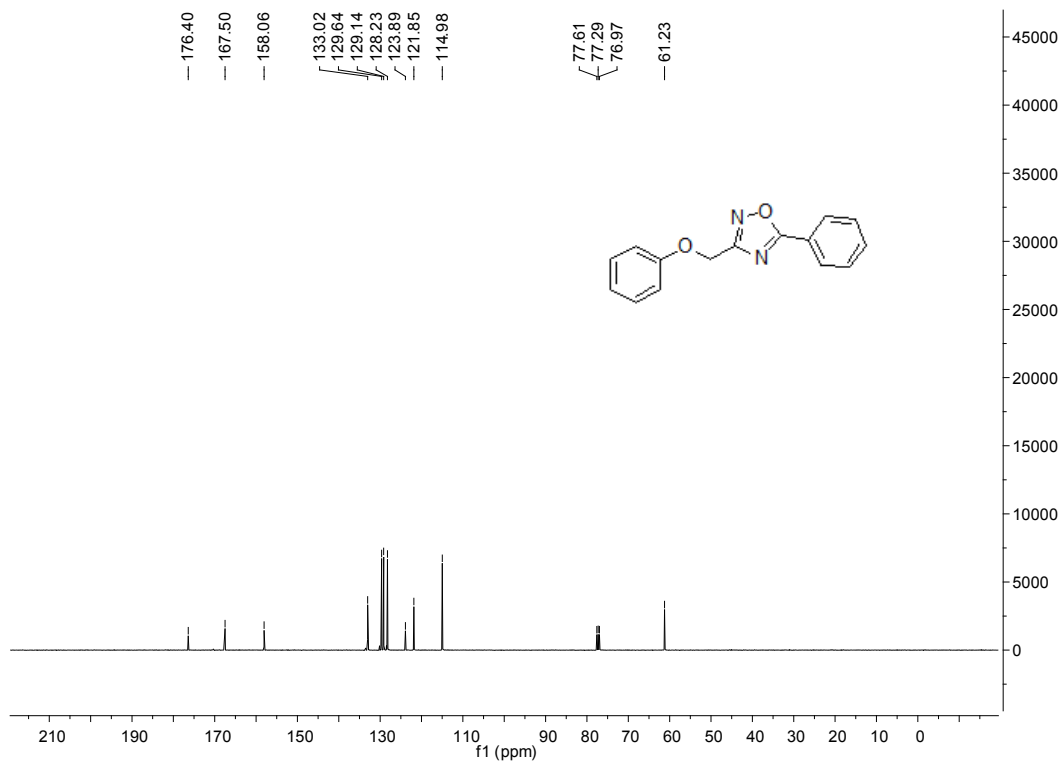

**<sup>13</sup>C NMR of 3qa**
